# Supplementary material
Source: MDPI journal article supplement (https://www.mdpi.com/2076-3417/13/11/6713)

## Supplementary Material

### Know an emotion by the company it keeps: Word Embeddings from Reddit/Coronavirus

**Figure S1.** Number of titles per week of the r/Coronavirus subreddit

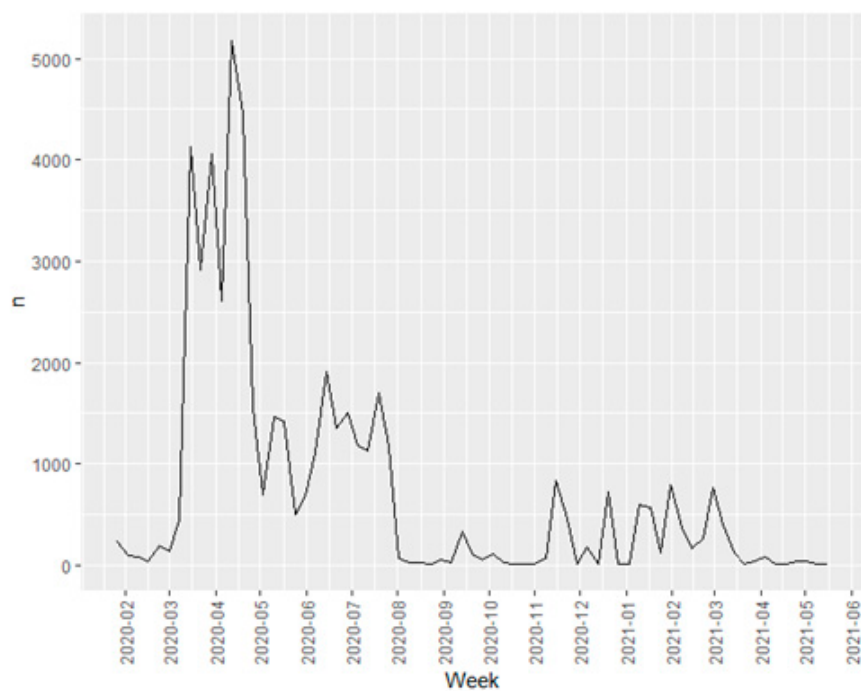

**Figure S2.** Top 50 most frequent words

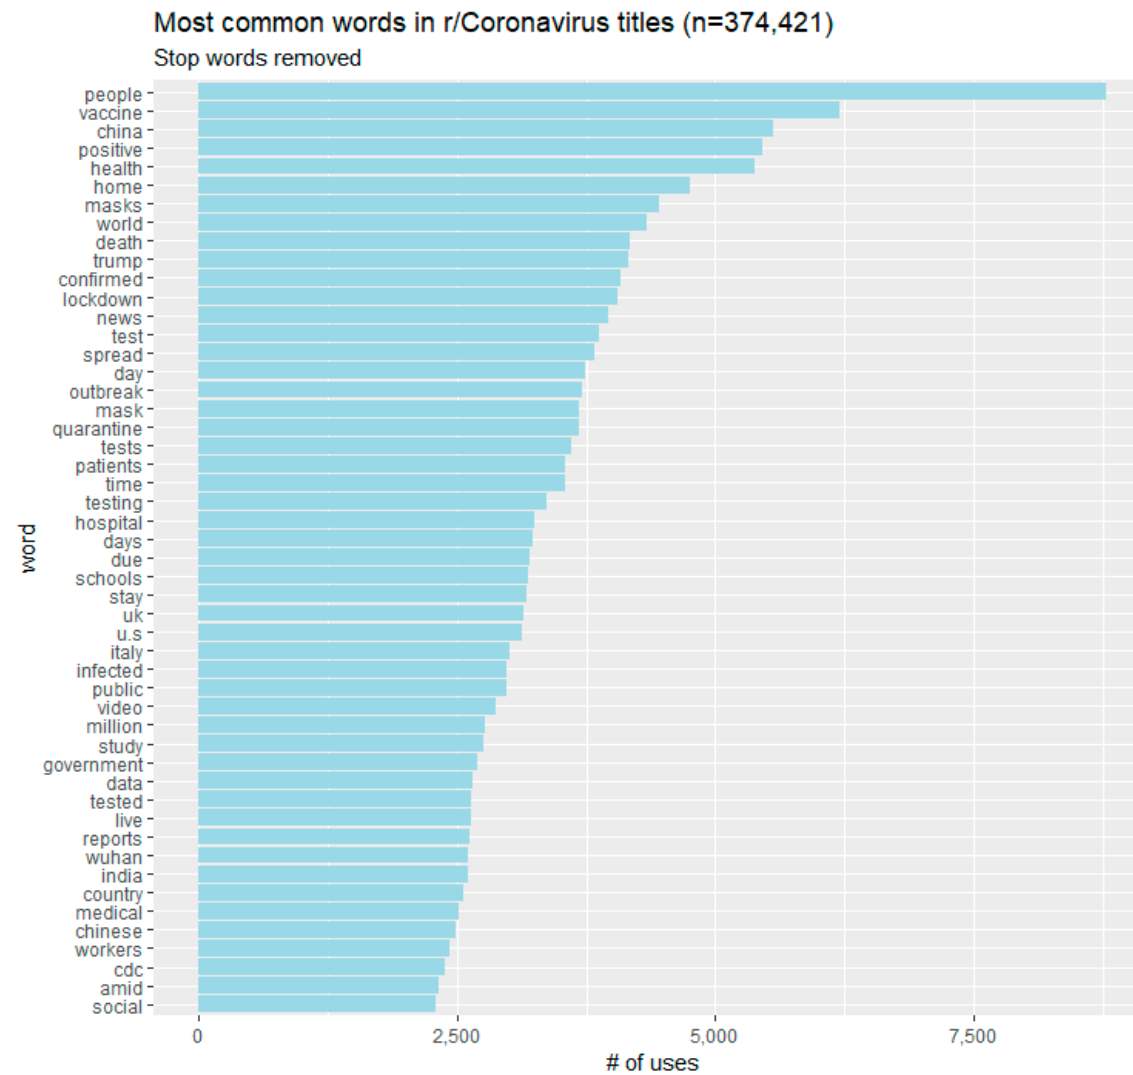

**Figure S3.** Terms with the steepest increase in frequency

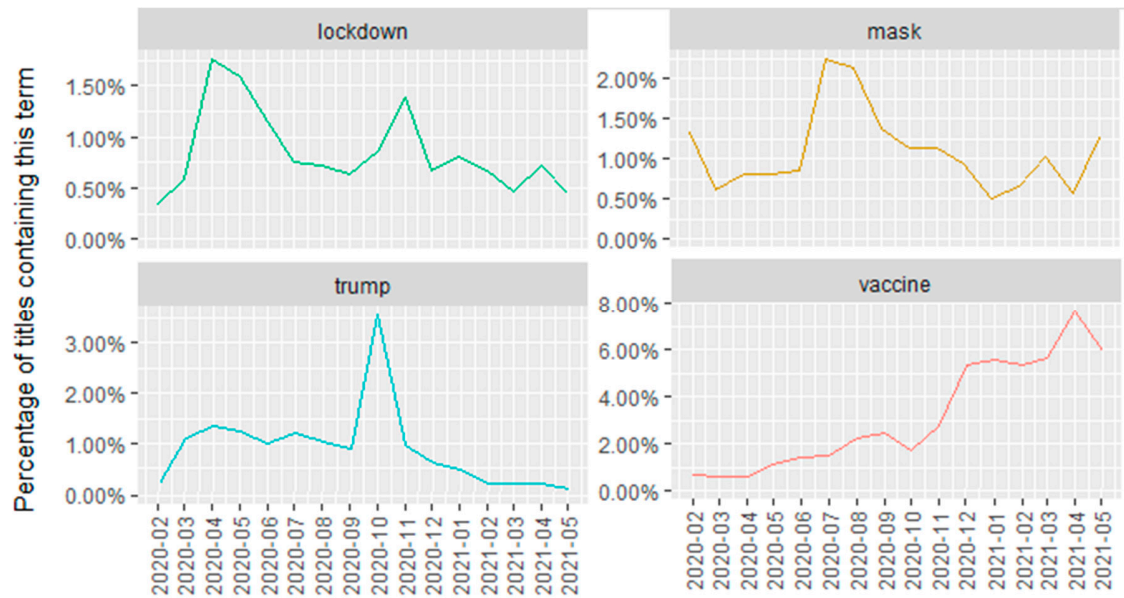

**Figure S4.** Wordcloud of all titles containing the “stress” term

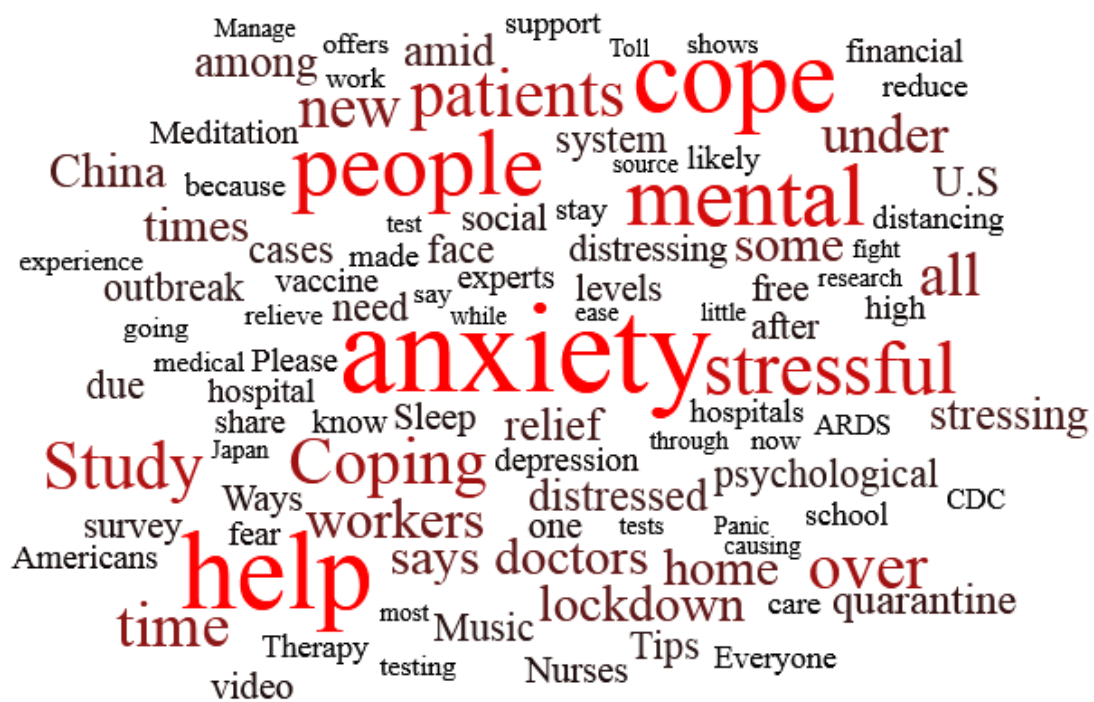

Supplement: s1 [file s1]
