# Supplementary material
Source: MDPI journal article supplement (https://www.mdpi.com/2076-3417/13/11/6713)
Supplement: s1 [file s1]

Archive with 2 entries (2 files):
- applsci-2324952-supplementary Table.xlsx
- applsci-2324952-supplementary-figures.pdf
