# Supplementary material
Source: MDPI journal article supplement (https://www.mdpi.com/2076-3417/13/11/6713)
Supplement: s1 [file s1 › applsci-2324952-supplementary Table.xlsx]

## Sheet: AppendixI
Category		diamond	hour	mother	mile	silver	magazine	officer	dog	cotton	blue	knife	church	chair	leg	apple	gun	president	house	beer	usa	robbery	hammer	priest	salt	gas	doctor	mountain	football	tornado	shirt	window	oxygen	drum	dollar	rap	eagle	water	car	biology	doll	fly	sarah	john	rose	cancer	oak	cruise	tuna
1. A precious stone	diamond	3.33067e-16	0.94035	1.01235	1.03762	1.01232	0.937782	0.993982	0.954723	0.87211	1.03404	0.982729	1.02339	0.959149	0.984537	1.03082	1.0346	1.09691	1.0008	1.04371	1.06145	0.971712	1.00588	1.04614	0.976785	1.10344	1.01719	0.836474	1.03595	0.989006	1.00369	0.93179	0.951537	1.02905	1.04886	0.969459	1.04376	0.988036	1.06123	1.01972	1.05248	0.879893	1.07815	0.932649	0.801098	0.931747	0.918526	0.331562	0.876928
	ruby	0.396393	0.892428	0.922786	0.936984	0.95478	0.998681	0.834097	0.986668	1.00637	1.00228	0.838483	0.924251	0.997578	0.896911	1.05137	0.881616	1.02268	0.951224	1.02449	1.15237	0.916387	0.901881	0.899545	0.998511	1.03794	0.989833	0.836816	0.890284	0.913368	0.968279	0.927391	1.01864	0.981445	0.925096	0.880777	0.886447	0.933125	0.959195	1.14499	0.926725	0.85723	1.01305	0.996147	0.862222	0.952427	0.881747	0.332736	0.856119
	gold	0.81994	0.856895	0.986472	0.862673	0.861751	0.887901	0.904506	0.935253	0.769334	0.963543	0.690186	0.992676	0.861345	0.937997	0.971572	0.771188	0.970833	1.04796	0.852758	1.09315	0.815116	0.893149	0.773757	0.896022	0.800813	0.920846	0.903977	0.879421	0.830675	0.90196	0.853719	0.814574	0.837175	0.788	0.900646	0.797856	0.867028	0.82596	0.973157	0.901958	0.949242	0.938845	0.930867	0.896707	0.973069	0.884247	0.768133	0.795076
	gem	0.778379	0.965009	0.967822	0.808121	0.86467	0.787036	1.00089	0.894324	0.921223	0.918479	1.01616	1.03215	0.975109	0.886803	0.882162	0.978062	1.16193	1.04615	0.935952	1.07289	0.922136	0.946642	1.00027	0.914301	1.09317	1.01051	0.821926	0.977187	0.960541	0.849266	0.854139	0.98364	1.0277	0.955751	0.899332	0.908623	0.979869	1.02507	0.812193	0.867505	0.875989	0.85512	0.929745	0.98329	0.93159	0.882232	0.794087	0.79059
		0.664904	0.91367	0.972357	0.911349	0.92338	0.90285	0.933369	0.942742	0.892259	0.979585	0.88189	0.993118	0.948295	0.926562	0.98398	0.916367	1.06309	1.01153	0.964226	1.09496	0.906338	0.936888	0.929927	0.946404	1.00884	0.984594	0.849798	0.94571	0.923398	0.930799	0.89176	0.942098	0.96884	0.929427	0.912554	0.909173	0.942015	0.967865	0.987516	0.937168	0.890588	0.971292	0.947352	0.88583	0.947208	0.891688	0.55663	0.829678
2. A unit time	hour	0.94035	4.44089e-16	0.905807	0.756792	1.02018	0.993782	0.954411	0.96499	1.0047	1.02016	0.944325	0.979333	1.00744	0.990221	0.899402	0.877565	0.970317	0.91113	0.934788	0.97455	0.945792	0.867843	0.978652	1.03842	0.891818	0.846439	0.941765	1.02908	0.852462	0.943334	0.864654	0.841809	0.982915	0.920135	0.864124	0.872355	0.942865	0.849262	0.977745	1.0374	0.902442	1.10146	0.870498	0.826569	0.917068	1.0292	0.951284	0.855614
	second	1.07441	0.966184	0.866584	1.03549	0.964185	1.01046	0.92028	0.922664	1.12194	0.995831	0.870151	0.980811	0.93246	1.02704	1.02308	1.0181	0.91476	0.958382	0.918915	0.948635	0.969581	0.986749	0.98198	1.05629	0.946423	0.873319	1.03266	0.904533	0.975013	0.928568	0.865643	0.937982	0.960959	0.982705	0.933485	0.947043	1.00643	1.06747	0.973613	0.940646	1.0312	0.987062	1.07404	0.874965	0.904991	1.05846	1.05545	1.01045
	minute	1.04107	0.685542	1.00206	0.858586	0.942555	0.933972	1.0297	0.984901	1.05716	0.832503	1.00878	0.972613	1.0439	1.04453	0.958617	1.0547	0.92776	0.944989	0.906676	0.981835	1.09847	0.953942	0.999348	0.912929	0.984989	0.932913	1.00491	1.01362	0.945875	0.847677	0.946131	0.926441	0.961243	0.873384	1.03621	1.02459	0.98925	0.917255	0.98203	0.973221	1.00558	1.01889	0.978855	0.989297	0.971135	1.02715	0.969764	0.90857
	year	0.974223	0.913627	0.649812	0.980014	0.971558	0.768624	0.961105	0.988036	0.991952	1.01375	0.888201	0.985363	0.980616	0.978325	1.02733	0.960735	0.941777	0.950659	0.831439	0.995979	0.908471	1.01845	0.809106	0.835478	0.943084	0.79915	1.01848	0.901714	0.92391	0.929824	0.812236	0.914163	0.880724	0.867089	1.04431	1.06574	1.00298	0.913134	0.979682	0.98074	1.06657	1.017	1.03921	0.870681	0.725741	0.930648	0.973886	0.946666
	day	1.02351	0.729284	0.905948	0.835851	0.974105	1.05079	0.99699	1.0085	1.10661	0.939327	1.01199	0.920731	1.03532	0.981185	1.05324	0.959455	0.895842	0.934785	1.01676	0.890626	1.10046	0.941877	0.93409	1.02533	0.969565	0.86533	1.02271	0.998625	0.89412	0.921001	0.877896	0.970793	0.943188	0.944027	0.956859	1.01458	1.03525	0.937564	1.06194	0.991515	0.991538	1.04853	0.977425	0.846656	0.95751	1.01879	1.00445	1.00438
		1.01071	0.823659	0.866042	0.893346	0.974516	0.951525	0.972497	0.973819	1.05647	0.960315	0.94469	0.96777	0.999947	1.00426	0.992336	0.974111	0.930091	0.939989	0.921715	0.958325	1.00456	0.953771	0.940635	0.973689	0.947176	0.86343	1.0041	0.969513	0.918276	0.914081	0.873312	0.918238	0.945806	0.917468	0.966997	0.984861	0.995356	0.936937	0.995003	0.984704	0.999466	1.03459	0.988007	0.881633	0.895289	1.01285	0.990967	0.945135
3. A relative	mother	1.01235	0.905807	7.77156e-16	0.883256	0.954829	0.932355	0.863788	0.829051	1.03401	0.918673	0.828873	0.788316	1.03564	0.786464	1.06232	0.908935	0.910684	0.917146	0.827003	0.95548	0.782504	1.00044	0.670967	0.888612	0.933008	0.651892	0.95361	0.885942	0.6596	0.841855	0.728054	0.928254	0.965506	0.79917	0.909154	0.91948	0.901389	0.817147	0.988845	0.903486	0.99178	0.895314	0.940349	1.03332	0.696558	0.832629	0.972372	0.888669
	father	0.888315	0.905903	0.313421	0.972736	1.03866	0.926196	0.907027	0.786955	1.06582	0.937614	0.84074	0.815399	0.950568	0.72235	1.04357	0.881899	0.857709	0.93203	0.850608	0.917378	0.795379	1.04532	0.696237	0.891573	0.986522	0.654805	0.947237	0.883485	0.676021	0.920041	0.733642	0.842387	1.02603	0.915002	0.896213	0.838939	0.991438	0.82976	0.927014	0.879272	0.884389	0.963462	0.878976	0.892806	0.735383	0.911319	1.03088	0.979266
	sister	0.76734	0.93797	0.487558	0.988321	1.0727	0.979044	0.898439	0.899139	0.999522	0.969599	0.948879	0.89248	0.996799	0.857761	0.996888	0.94	0.906626	0.876725	0.94723	0.975484	0.795379	1.02083	0.810214	0.868873	0.916171	0.725912	0.851337	0.942161	0.767421	0.864096	0.739627	0.921162	0.961495	0.917673	0.841678	0.940866	0.98609	0.83195	0.984336	0.919136	0.897798	0.877207	0.845877	0.971606	0.766658	0.91242	0.782666	0.809074
	brother	0.99032	0.936893	0.576369	0.950822	0.953244	0.875797	0.924088	0.822128	0.922838	0.946198	0.917393	1.06966	1.04501	0.886899	1.00234	0.883399	0.939973	1.02339	0.812138	0.891929	0.794371	0.920126	0.876255	0.922067	1.07439	0.804123	0.984789	0.820763	0.824304	0.787872	0.724879	0.953013	0.887978	0.958841	0.831757	0.952786	1.00851	0.812616	1.04647	0.895189	0.945407	0.975341	0.991363	0.954341	0.83759	0.913006	0.977584	0.928004
	son	1.0006	1.00466	0.483948	1.01062	1.06063	0.926221	0.939835	0.86184	0.993142	0.973612	0.860652	0.948828	0.965989	0.827737	1.03121	1.00134	0.839749	0.952089	1.00205	0.827103	0.914482	1.1338	0.865452	1.01073	1.03872	0.810485	0.936805	0.886178	0.843442	0.99027	0.947954	0.975887	1.05822	0.942511	0.965753	1.00522	0.966445	0.927292	1.00044	0.977723	0.946749	0.916382	0.9961	0.967403	0.902834	0.961821	1.05107	0.905288
		1.0006	1.00466	0.483948	1.01062	1.06063	0.926221	0.939835	0.86184	0.993142	0.973612	0.860652	0.948828	0.965989	0.827737	1.03121	1.00134	0.839749	0.952089	1.00205	0.827103	0.914482	1.1338	0.865452	1.01073	1.03872	0.810485	0.936805	0.886178	0.843442	0.99027	0.947954	0.975887	1.05822	0.942511	0.965753	1.00522	0.966445	0.927292	1.00044	0.977723	0.946749	0.916382	0.9961	0.967403	0.902834	0.961821	1.05107	0.905288
4. A unit of distance	mile	1.03762	0.756792	0.883256	4.44089e-16	1.05569	0.926735	0.925576	1.00734	1.05748	0.915626	0.881001	0.922522	1.04617	0.898899	0.99175	0.938378	1.12301	1.05095	0.918703	1.06082	1.00503	0.936607	0.913606	1.08538	0.995902	1.01869	0.749133	0.977589	0.833344	0.927638	0.834164	1.09161	0.972249	0.857085	0.945576	0.929871	1.04908	0.806011	1.01687	0.980977	0.999703	1.0429	0.961478	1.09417	0.896454	0.952852	0.908857	0.775955
	meter	0.969659	0.988881	0.966251	0.870014	0.887305	0.913785	0.968637	0.869703	0.880131	0.808022	0.837136	0.992355	0.959475	0.954438	0.840392	0.917673	0.946766	0.968737	0.889084	0.900198	0.91077	0.887121	0.905796	0.96589	0.876022	1.10063	0.863443	0.92303	0.939873	0.908179	0.867027	1.09271	0.881576	0.88379	0.973595	0.99252	0.869957	0.958402	0.980149	0.922692	0.902083	0.967221	0.921462	0.950456	1.09377	0.956269	1.01254	0.772189
	km	0.957385	0.860482	0.730781	0.738436	1.00348	1.01178	0.886217	0.957115	0.972033	0.978688	0.863886	0.920667	0.93269	0.860052	1.00629	0.91983	1.04409	1.00517	0.825205	0.985744	0.928067	1.00969	0.83021	0.919151	0.879787	0.97391	0.969006	1.01103	0.698752	0.956641	0.843507	0.871227	0.989747	0.863454	0.907108	0.932529	0.942055	0.790406	1.00422	1.01147	0.817471	1.05955	1.0211	0.972345	0.940275	0.909422	0.942416	0.786683
	inch	0.969739	0.903753	0.998137	0.958816	0.893259	0.900492	0.970009	1.11028	0.99332	0.947426	0.926399	0.914341	0.88351	0.96431	0.883001	0.944521	1.01307	0.863374	0.840255	1.13185	0.872405	0.804296	0.99522	0.986704	0.850723	1.04249	0.85435	0.893962	0.917629	0.950162	0.908648	0.926941	0.744885	0.782905	0.960481	0.901062	0.878189	0.830247	0.866675	0.79019	1.037	0.876541	0.941636	0.918862	1.04792	0.850692	0.927638	0.845312
	yard	0.998908	0.749287	0.70611	0.629667	0.8969	0.894343	1.00263	0.774878	0.896582	0.901909	0.799655	0.864384	0.987025	0.87519	0.968204	0.87997	0.957707	0.947601	0.845975	1.10199	0.75027	0.919112	0.777643	0.918465	0.964813	0.821646	0.85573	0.944192	0.683521	0.726138	0.694775	0.899488	0.946009	0.885195	0.788053	0.875829	0.845645	0.759559	0.98688	0.78374	0.809186	0.856176	0.914007	0.98456	0.913581	0.938972	0.889393	0.651431
		0.986662	0.851839	0.856907	0.799233	0.947327	0.929427	0.950614	0.943863	0.95991	0.910334	0.861615	0.922854	0.961773	0.910578	0.937926	0.920074	1.01693	0.967165	0.863845	1.03612	0.893308	0.911364	0.884495	0.975119	0.913449	0.991474	0.858332	0.949961	0.814624	0.893752	0.829624	0.976396	0.906893	0.854486	0.914962	0.926362	0.916984	0.828925	0.970959	0.897813	0.913089	0.960477	0.951937	0.984079	0.978399	0.921641	0.936169	0.766314
5.A metal	silver	1.01232	1.02018	0.954829	1.05569	5.55112e-16	0.801864	0.974913	0.909326	0.884742	0.957414	0.796733	0.944372	0.941503	1.05803	0.905771	0.841934	0.958488	1.0841	0.799985	1.01391	0.942084	0.89944	0.914385	0.773891	0.895291	0.921115	0.995581	0.872226	1.02596	0.91295	0.856982	1.01458	0.919493	0.9724	0.973861	1.00175	0.825555	0.916592	0.833352	0.855842	1.02	0.769161	0.968126	1.06058	1.01446	0.946334	0.935293	0.83674
	gold	0.81994	0.856895	0.986472	0.862673	0.861751	0.887901	0.904506	0.935253	0.769334	0.963543	0.690186	0.992676	0.861345	0.937997	0.971572	0.771188	0.970833	1.04796	0.852758	1.09315	0.815116	0.893149	0.773757	0.896022	0.800813	0.920846	0.903977	0.879421	0.830675	0.90196	0.853719	0.814574	0.837175	0.788	0.900646	0.797856	0.867028	0.82596	0.973157	0.901958	0.949242	0.938845	0.930867	0.896707	0.973069	0.884247	0.768133	0.795076
	iron	1.03388	1.01025	0.942637	1.0355	0.79664	0.926394	1.01304	0.920143	0.944734	0.808188	0.911732	1.03297	0.882173	0.838065	1.02205	0.980836	0.882855	0.994937	0.907189	1.00653	0.815356	0.944871	0.963833	0.894777	0.854014	0.91565	0.920451	0.884834	0.864305	0.761212	0.984446	0.703608	0.938917	0.925993	0.991689	0.815718	0.949921	0.760686	0.804646	0.796895	0.869184	0.8608	0.908633	0.985711	0.872118	0.986664	1.03853	0.802926
	copper	0.97911	0.776442	1.10454	1.02733	0.819385	0.87	1.04717	0.921391	0.802947	0.974347	0.910992	1.0108	0.878893	1.11121	0.883632	0.91193	0.945858	1.0025	0.924416	1.08159	0.943781	0.98563	0.961779	0.787455	0.846523	0.99139	0.936623	1.12623	0.97178	0.786126	0.938314	0.847462	0.973727	1.00284	1.10411	0.996597	0.748169	0.883254	0.845509	0.996084	1.03831	0.994703	1.03316	0.979259	0.982226	1.00975	1.00629	0.90031
	titanium
		0.961311	0.915942	0.997119	0.995299	0.825925	0.87154	0.984908	0.921528	0.850439	0.925873	0.827411	0.995205	0.890979	0.986326	0.945756	0.876472	0.939508	1.03237	0.871087	1.0488	0.879084	0.930773	0.903439	0.838036	0.84916	0.93725	0.939158	0.940678	0.923179	0.840562	0.908365	0.845057	0.917328	0.922308	0.992576	0.902981	0.847668	0.846623	0.864166	0.887695	0.969185	0.890877	0.960196	0.980565	0.960468	0.956749	0.937063	0.833763
6. A type of reading material	magazine	0.937782	0.993782	0.932355	0.926735	0.801864	9.99201e-16	1.02122	0.958696	0.80744	0.941924	0.920224	1.01604	0.841002	1.04244	0.92381	0.964768	0.972357	1.04207	0.941484	0.942002	0.919574	0.937168	0.99001	0.868461	1.03566	1.00421	0.805689	0.865212	0.95549	0.96687	0.851611	1.11609	0.845891	0.926646	0.969166	0.998632	0.97343	0.988855	0.672606	0.794531	0.950689	0.792868	0.967757	0.892333	0.905146	1.00615	0.953134	0.93899
	book	0.893368	0.942235	0.91549	0.935685	0.841296	0.769049	1.02192	1.02153	0.939069	0.896334	1.06581	1.03046	0.971698	0.968974	0.959673	1.01197	0.961416	0.990532	0.805884	1.12192	0.783168	0.948171	1.02441	0.876824	1.03382	0.950215	1.02423	1.03498	0.864893	0.946354	0.89766	0.957553	0.924193	0.918512	0.881275	0.983971	0.937064	0.983152	0.800372	0.991679	0.931588	0.840743	1.0491	1.0717	0.899803	0.996549	0.932312	0.971469
	newspaper	0.983839	0.960172	0.850944	0.854007	0.881717	0.771931	0.985578	0.93267	0.984436	0.927858	0.875298	1.04854	0.937255	0.99366	0.987384	0.996256	0.85761	0.974843	0.927654	0.936972	0.880142	1.00702	0.893072	1.03121	1.02202	0.874976	0.926004	0.896063	0.961654	0.927247	0.721706	0.989239	0.969914	0.968891	0.888722	0.938001	1.01265	0.954233	0.927681	0.890281	0.96516	0.860029	1.04889	0.953837	0.912488	0.981472	0.993036	0.916659
	journal	0.981233	0.971047	0.975115	0.915696	0.929322	0.652154	0.830719	1.09053	0.881	0.914449	0.968755	1.02631	0.848972	1.03473	0.994803	0.932099	0.971775	1.05369	1.11751	1.05742	0.902964	1.01046	0.972845	0.994956	1.02227	0.84872	0.907403	0.928435	0.909221	1.02259	0.920209	0.997685	0.937659	0.898643	1.04242	1.04295	1.00579	0.997774	0.688722	0.978962	1.05607	0.816093	0.929058	0.90452	0.83239	1.01525	0.997756	1.04726
	novel	0.975508	0.961308	0.938862	1.01152	0.901059	0.862729	0.967424	0.860901	0.83748	1.03258	1.0557	0.98778	0.970925	0.929237	0.970372	0.997625	0.930856	0.932203	0.95604	0.949536	0.8921	1.05822	0.867404	1.00874	1.01459	0.903037	0.982449	1.04209	0.894831	1.07107	1.02835	1.05216	0.922565	1.04841	0.958272	1.06382	0.875311	0.993735	0.732353	0.905704	1.09158	0.995264	0.972342	0.934274	0.859111	1.01338	0.984472	1.09863
		0.954346	0.965709	0.922553	0.928729	0.871052	0.763966	0.965372	0.972865	0.889885	0.94263	0.977158	1.02183	0.91397	0.993809	0.967209	0.980544	0.938803	0.998667	0.949715	1.00157	0.87559	0.992209	0.949548	0.956038	1.02567	0.916232	0.929155	0.953357	0.917218	0.986825	0.883907	1.02255	0.920044	0.95222	0.947971	1.00547	0.960848	0.98355	0.764347	0.912231	0.999019	0.860999	0.99343	0.951332	0.881788	1.00256	0.972142	0.994602
7. A military title	officer	0.993982	0.954411	0.863788	0.925576	0.974913	1.02122	-2.22045e-16	1.03251	0.941219	0.833809	0.723097	0.995665	0.795148	0.765357	1.01535	0.828389	0.972629	0.982833	0.969339	1.01419	0.926002	0.87912	0.94182	0.98143	0.826318	0.823758	0.957387	0.98768	0.916192	0.880458	0.855126	0.909257	0.945741	0.994065	0.948998	0.951918	0.986283	0.873911	0.834068	1.05354	0.897359	0.901497	0.987357	1.01198	1.00784	0.891441	0.936766	1.02381
	captain	0.850084	0.929833	0.83954	1.1149	0.929774	0.909581	0.766649	1.00009	0.893214	0.937486	0.951243	0.922784	0.994191	0.839515	0.982704	0.873951	0.846873	0.954653	0.920926	0.980357	0.847974	0.835803	0.955536	0.962191	0.913391	0.948857	1.05012	1.00416	0.905931	0.856954	0.857864	0.911792	0.913054	0.98214	0.96038	0.945088	1.03192	1.04478	0.963938	0.935419	0.849465	0.901211	0.986921	0.898332	0.982394	0.958906	0.797209	0.930608
	chief	1.05575	1.03193	1.00644	0.976917	0.877518	0.908581	0.368314	1.06384	0.961526	0.90505	0.805225	0.968638	0.720073	0.829126	1.02095	0.889914	0.815774	0.870152	1.03194	1.08371	0.901098	0.941198	0.91823	1.04656	0.962941	0.762685	0.924209	0.965532	1.02813	0.943792	0.841465	0.907979	0.910235	1.0192	1.07302	1.07551	1.00898	0.971572	0.837773	0.966225	0.937561	0.822385	0.950626	0.928165	0.973521	1.01042	0.99269	1.00773
	soldier	0.778773	1.01824	0.874604	1.03082	0.993281	1.01238	0.947977	0.787926	0.914288	1.02782	0.86784	0.876097	0.871143	0.952658	1.04708	1.06427	0.839318	0.933934	0.964247	1.01317	0.864942	1.03654	0.772178	0.844008	0.929315	0.795821	0.876349	0.953971	0.919718	0.940902	0.855016	0.994263	0.88295	0.90467	0.928788	0.870866	1.06328	0.98188	0.940707	0.981596	0.902135	0.897854	0.988708	0.89066	0.89797	0.776699	0.828956	0.889909
	commander	0.925633	0.938228	0.992559	1.13687	0.886219	0.957858	0.773566	1.04292	0.941985	0.940373	0.944428	0.953017	0.929723	0.936252	1.05329	0.894368	0.793665	1.01018	0.931442	0.948952	0.878866	0.849296	0.960033	0.901016	0.848716	0.95788	1.00543	0.983982	0.956518	1.00742	0.914246	0.947224	0.956042	0.95704	0.976524	0.934781	1.02562	0.996958	0.940074	0.981377	0.814872	0.924599	0.982275	0.923415	1.09404	0.96224	0.85573	0.927582
		0.920845	0.97453	0.915386	1.03702	0.932341	0.961924	0.714126	0.985459	0.930446	0.928907	0.858367	0.94324	0.862056	0.864582	1.02388	0.910178	0.853652	0.95035	0.96358	1.00808	0.883776	0.908392	0.909559	0.947042	0.896136	0.8578	0.962699	0.979065	0.945298	0.925905	0.864743	0.934103	0.921604	0.971424	0.977542	0.955633	1.02322	0.973821	0.903312	0.983632	0.880278	0.889509	0.979177	0.930511	0.991154	0.919942	0.88227	0.955929
8. A four-footed animal	dog	0.954723	0.96499	0.829051	1.00734	0.909326	0.958696	1.03251	3.33067e-16	0.91226	0.96131	0.841677	0.973689	0.991897	0.869322	0.99662	0.934428	0.939935	0.884643	0.840671	1.05735	0.854963	1.03179	0.929209	0.826187	0.923399	0.939904	0.770718	0.998177	0.789956	0.935649	0.920162	1.00957	1.01923	1.02822	0.908273	0.865637	0.820236	0.882645	1.05308	0.827682	0.80702	0.920242	0.96666	1.05677	0.965393	1.04297	1.02396	0.919725
	cat	0.934337	0.992725	0.754411	0.992179	0.922536	0.903777	1.04859	0.339306	0.890872	1.07726	0.845088	0.951266	0.951677	0.867836	0.987283	0.948686	0.934608	0.973789	0.806014	0.993058	0.808559	1.04292	0.850801	0.900897	0.926532	0.885706	0.811565	1.04423	0.81942	0.934378	0.946549	1.00294	0.946981	1.00431	0.924701	0.933308	0.837895	0.854387	0.983864	0.832903	0.940083	0.915473	0.937791	1.0502	0.912947	1.03041	0.973175	0.93354
	horse	0.920607	0.88118	0.951703	0.870544	0.9809	0.956665	0.951251	0.851983	0.8998	1.0174	0.879894	0.879711	0.984949	0.881568	0.875622	0.93265	0.968022	0.994699	0.923565	1.12054	0.868582	0.972607	0.772275	0.870647	0.840677	0.884712	0.891186	0.948333	0.833206	1.02814	0.953993	0.84464	0.890199	0.998512	0.888192	0.873447	0.806738	0.851797	0.97429	0.843434	0.82953	0.899355	0.947455	0.934185	0.849328	0.931095	0.90948	0.803715
	pig	1.06518	1.06112	0.957536	0.891667	0.844003	0.959929	1.10901	0.824621	0.919462	1.08251	0.958665	0.972943	0.95425	0.94943	1.06273	0.968072	0.839087	0.923297	0.934863	1.15524	0.749576	0.839938	0.940027	1.02822	1.0093	1.00422	0.962703	0.96984	0.995636	0.903292	0.980448	0.927498	0.856371	0.998031	0.822414	0.874415	0.97789	0.913694	0.948965	0.803406	0.934313	0.881489	1.02704	0.957152	0.950989	0.916254	1.03256	0.924388
	cow	0.988608	0.919286	0.985527	1.0664	0.868119	0.981228	1.09277	0.980318	0.937682	1.03553	0.893766	0.85501	0.962318	1.07958	1.09557	0.866847	0.978506	0.960757	0.731716	1.08543	0.904347	1.00624	0.88753	0.977819	0.847355	1.00219	1.02002	0.976961	0.989276	0.978656	0.945847	0.853811	0.970067	0.997625	0.833094	0.903839	0.701026	0.988286	0.937299	0.828614	0.920833	0.938174	0.988668	0.992149	0.923795	0.924392	0.949086	0.824881
		0.972691	0.963861	0.895645	0.965626	0.904977	0.952059	1.04683	0.749057	0.912015	1.0348	0.883818	0.926524	0.969018	0.929548	1.00356	0.930137	0.932031	0.947437	0.847366	1.08232	0.837205	0.978699	0.875968	0.920754	0.909454	0.943346	0.891238	0.987508	0.885499	0.956024	0.9494	0.927692	0.93657	1.00534	0.875335	0.890129	0.828757	0.898162	0.9795	0.827208	0.886356	0.910946	0.973523	0.998092	0.92049	0.969025	0.977652	0.88125
9. A type of fabric	cotton	0.87211	1.0047	1.03401	1.05748	0.884742	0.80744	0.941219	0.91226	5.55112e-16	1.01856	1.02184	1.00303	0.808801	0.961456	0.886649	1.00204	0.973031	0.90499	1.01566	0.888356	0.80222	0.807151	0.959162	0.844719	0.814859	1.05122	0.916735	1.0586	1.04051	0.805843	1.00665	0.957701	0.852801	0.941663	0.990027	0.949101	0.865608	1.04048	0.843178	0.993811	0.982716	0.880207	0.903958	0.976464	1.01279	0.95175	0.954949	0.915742
	silk	0.712012	1.02522	1.04087	0.982187	0.900725	0.82338	0.988927	0.918898	0.820858	1.00144	0.87655	0.87618	0.849277	0.91205	0.845805	0.888123	0.894115	0.918473	0.994827	1.06075	0.899847	0.855564	0.939216	0.956359	0.963595	1.00589	0.842178	0.990027	0.990272	1.03821	1.01791	1.09219	0.798241	0.898348	1.03572	0.894865	0.911335	0.922386	0.869166	0.828188	1.03417	0.907784	0.907105	0.869136	1.01461	0.832572	0.748276	0.895628
	leather	1.1267	0.954388	0.902645	0.950339	0.832737	0.859769	0.963992	0.855169	0.788325	0.776394	0.862453	0.898726	0.890213	0.977381	0.942602	0.805248	0.895638	0.946714	0.708286	0.984914	0.760988	0.813987	0.990349	0.831681	0.737465	0.920013	0.972169	0.964293	0.946931	0.84998	0.920534	0.88776	0.896255	0.928001	1.00959	0.727399	0.774734	0.740914	0.858598	0.728866	0.980309	0.931757	1.01475	1.13804	0.954098	0.99195	1.05493	0.813158
	nylon
	wool
		0.903607	0.99477	0.992506	0.996669	0.872735	0.830196	0.964713	0.895442	0.804591	0.932131	0.92028	0.925979	0.84943	0.950296	0.891686	0.898471	0.920928	0.923392	0.906256	0.978006	0.821018	0.825567	0.962909	0.877586	0.838639	0.992375	0.910361	1.00431	0.992572	0.898011	0.981698	0.979216	0.849099	0.922671	1.01178	0.857122	0.850559	0.901261	0.85698	0.850289	0.999066	0.906583	0.941938	0.994547	0.993835	0.925424	0.919386	0.874843
10. A color	blue	1.03404	1.02016	0.918673	0.915626	0.957414	0.941924	0.833809	0.96131	1.01856	7.77156e-16	0.939719	0.918784	0.962908	0.825003	0.969495	0.90159	0.940114	0.93301	0.928783	0.92429	0.91822	0.9704	0.845576	0.93451	0.859143	0.967921	0.899284	0.887077	0.861203	0.793874	0.88341	0.946213	0.917907	0.885356	1.02441	0.851272	1.04546	0.821652	0.997509	0.940868	0.698699	1.09119	0.928211	0.966221	0.960306	1.0752	0.947977	0.916019
	red	0.992578	1.00935	0.994109	0.97	0.965684	1.00578	0.949799	0.969704	1.082	0.538577	0.953199	1.06063	1.0337	0.872158	0.995736	0.982396	0.937627	0.866352	0.939651	0.946304	0.906495	0.996672	0.929631	1.02943	0.865077	0.943301	0.83483	0.870306	0.867461	0.885647	0.992879	0.798354	0.942315	0.930175	0.943757	0.878431	1.01563	0.872425	0.953155	0.934482	0.772018	0.9853	1.03468	0.994964	0.893521	0.988112	0.964631	0.922649
	yellow	1.00566	0.907686	1.00996	0.890442	0.897098	1.06701	0.934015	0.930548	1.09693	0.570653	0.849107	0.939956	0.959874	0.954042	1.0074	0.958603	0.936381	1.04188	0.881426	0.999094	0.981252	1.07843	0.888642	0.845997	0.801889	1.04728	0.875531	0.973078	0.930577	0.925236	1.009	0.822773	1.06362	1.0434	1.00661	0.918006	0.940039	0.864972	0.882453	0.971924	0.754129	0.978642	0.937135	1.02093	1.02979	0.992397	1.01932	0.853777
	green	0.972259	0.94235	0.868903	0.888147	0.873049	1.02627	0.954751	0.949836	1.08148	0.641552	0.867431	1.04876	0.963679	0.877197	0.939638	0.891657	1.06388	0.948242	0.815563	1.04153	0.968429	0.955931	0.978755	0.926809	0.846783	1.0097	0.839209	0.920046	0.894764	0.874663	0.877152	0.967773	0.928306	0.802499	1.00926	0.938405	0.954214	0.876081	0.980406	0.907034	0.787735	1.03428	0.966241	0.968532	0.927844	0.992081	0.909989	0.861325
	brown	0.953963	0.973794	0.944064	0.948354	0.89889	0.925929	0.867427	1.03668	0.95434	1.01316	0.926439	0.922106	0.926362	0.986053	0.97167	0.896259	0.940003	1.05598	0.911662	0.921831	0.861326	0.940248	0.992718	0.878817	0.946556	0.925415	0.95943	0.996748	0.958764	0.939892	0.95939	0.98756	1.03093	0.961704	0.939968	0.802597	0.989481	0.947604	0.958519	1.05909	1.07842	0.874077	0.907726	0.964099	0.99699	0.910033	0.897755	0.957497
		0.9917	0.970669	0.947142	0.922514	0.918427	0.993383	0.90796	0.969616	1.04666	0.690985	0.907179	0.978047	0.969305	0.902891	0.976788	0.926101	0.963601	0.969094	0.895417	0.966609	0.927145	0.988336	0.927065	0.923112	0.86389	0.978724	0.881657	0.929451	0.902554	0.883862	0.944367	0.904535	0.976617	0.924627	0.9848	0.877742	0.988965	0.876547	0.954408	0.962679	0.8182	0.992698	0.954799	0.98295	0.961691	0.991566	0.947934	0.902253
11. A kitchen utensil	knife	0.982729	0.944325	0.828873	0.881001	0.796733	0.920224	0.723097	0.841677	1.02184	0.939719	1.11022e-15	1.01497	0.818155	0.930172	1.00753	0.628532	0.905777	1.04263	0.784243	1.0221	0.841494	0.886972	0.847218	0.878744	0.72686	0.843848	0.824585	0.782365	0.843082	0.863107	0.843324	0.943241	0.797717	0.828763	0.855041	0.86294	0.913291	0.736074	0.875534	0.789164	0.999632	0.910008	0.963431	0.84821	1.03419	0.912657	0.944471	0.768179
	fork	0.998188	0.91537	0.882889	0.909592	0.999573	1.05055	0.932396	1.06373	1.14481	0.949713	0.800377	0.816307	0.916145	0.942221	1.05182	0.916712	0.965862	0.950698	0.852191	1.09111	0.883186	0.921181	0.992681	0.9191	0.882152	1.02216	0.919972	0.839833	0.810609	0.924374	0.928909	0.912597	0.895115	0.883824	0.942936	0.821421	0.884556	0.794959	0.895484	0.875103	1.08275	0.954238	0.981755	0.873937	0.968859	0.875133	0.954743	0.907781
	spoon	1.04692	0.932389	0.988584	0.92525	0.935157	0.982744	1.07504	1.01299	0.955573	0.829987	0.978424	0.493732	0.91228	0.897506	0.992133	0.923346	0.934245	0.958285	1.02212	1.01527	0.856153	0.978239	0.50522	0.922708	1.00259	0.937199	0.873654	0.898289	0.871848	1.04005	0.896149	0.979807	0.89887	0.983018	1.04533	0.913995	0.878109	0.890547	0.863491	0.783552	0.98244	0.967614	0.973312	0.891147	1.00907	0.97371	1.02842	0.800825
	bowl	1.02002	1.05842	0.934794	0.91077	0.943542	0.960636	0.985818	0.889583	1.01504	0.879242	0.817855	0.857805	1.0238	0.978249	1.05475	0.954423	1.0031	0.950437	0.852126	1.03267	0.842946	0.920461	0.739476	0.883652	1.01462	0.921156	0.888439	0.744432	0.885126	0.865566	0.891071	0.966687	0.897133	1.02448	0.852606	0.752499	0.732001	0.974967	0.934336	0.851717	0.946153	1.03278	1.06791	0.926979	0.929553	0.943997	0.917021	0.93689
	stove
		1.01196	0.962626	0.908785	0.906653	0.918751	0.978539	0.929087	0.951996	1.03431	0.899665	0.865552	0.795703	0.917595	0.937037	1.02656	0.855753	0.952245	0.975513	0.877669	1.04029	0.855945	0.926713	0.771149	0.901051	0.906555	0.931091	0.876663	0.81623	0.852666	0.923273	0.889863	0.950583	0.872209	0.930021	0.923978	0.837714	0.851989	0.849137	0.892211	0.824884	1.00274	0.966159	0.996602	0.885068	0.985419	0.926374	0.961164	0.853419
12. A building for religious services	church	1.02339	0.979333	0.788316	0.922522	0.944372	1.01604	0.995665	0.973689	1.00303	0.918784	1.01497	3.33067e-16	0.940064	0.988068	0.964554	0.890423	0.913271	0.88695	0.948894	1.02163	0.871246	1.00707	0.547934	0.818195	0.990517	0.895109	0.994478	0.980262	0.881725	0.987047	0.924203	1.05994	0.939993	0.968013	1.00693	0.780925	0.851898	0.861177	0.936594	0.829841	1.01759	0.888107	0.964054	0.911839	0.957076	0.869291	0.957967	0.954415
	temple	0.89362	1.00052	0.998377	0.847027	0.867109	0.942981	0.954707	0.856239	0.972084	0.93292	0.75814	0.820639	0.880014	0.936277	1.02273	0.949213	0.942644	1.02128	0.873478	0.98405	0.85119	0.92704	0.754892	0.838033	0.912574	0.970191	0.836936	0.860182	0.826256	0.948884	0.830754	0.884149	0.977526	0.973345	0.899569	0.869115	0.881792	0.877847	0.924166	0.877404	0.967261	1.00477	0.917928	0.97219	0.970598	0.735582	0.914817	0.855159
	chapel	0.95843	0.960584	0.935328	0.91664	0.954651	0.965283	0.964161	0.932772	1.00861	1.06175	0.924084	0.96679	0.914533	1.00179	0.971577	0.979834	0.968131	0.995429	1.03526	1.04784	0.925465	0.907879	1.00209	1.03843	0.94422	0.902852	0.95745	0.943227	0.931683	0.954715	0.918928	0.934886	0.935203	0.954035	0.941001	0.910209	1.10179	0.938685	0.749798	0.917534	1.12011	0.899134	0.895727	0.944421	0.84321	0.822093	0.941447	1.04777
	sanctuary	0.90404	0.918463	0.890253	0.856091	0.97309	0.909727	1.01385	0.864349	0.823809	0.87783	0.895315	0.914293	1.08721	0.998465	0.964865	0.839443	0.879391	0.887128	0.877264	0.948787	0.71624	0.835755	0.829463	0.816306	0.96722	0.854819	0.71379	0.949414	0.776332	0.849305	0.861153	1.1097	0.819016	0.860253	0.857554	0.730729	0.73622	0.845528	1.04486	0.856851	0.907251	0.939419	0.97715	1.02046	0.997659	0.797998	0.86325	0.888668
	house	1.0008	0.91113	0.917146	1.05095	1.0841	1.04207	0.982833	0.884643	0.90499	0.93301	1.04263	0.88695	0.827608	0.821576	0.927745	0.979399	0.809637	8.88178e-16	0.966758	0.921954	0.7471	0.884105	0.891108	1.00436	0.957248	0.834586	0.888573	1.02043	0.847191	1.00009	0.870749	0.934406	0.871704	0.857767	0.958513	0.930533	0.964643	1.00238	1.0167	0.707877	0.969188	0.947873	0.982872	0.818325	0.916515	1.04096	1.03341	1.03136
		0.956057	0.954007	0.905884	0.918645	0.964664	0.975219	0.982243	0.902338	0.942504	0.944858	0.927028	0.897168	0.929886	0.949235	0.970294	0.927662	0.902615	0.758158	0.940331	0.984852	0.822248	0.912371	0.805096	0.903065	0.954356	0.891511	0.878245	0.950703	0.852637	0.948008	0.881158	0.984615	0.908688	0.922682	0.932713	0.844302	0.907269	0.905122	0.934424	0.837902	0.99628	0.935862	0.947546	0.933447	0.937012	0.853184	0.942178	0.955474
13. A part of speech	verb
	noun
	adjective
	word	0.91001	0.893184	0.94462	0.899963	0.950573	0.880534	0.955265	0.903048	0.79054	0.997954	1.07983	1.01696	0.952836	0.979602	0.978238	1.04221	0.974092	0.951161	0.957349	0.877274	0.83684	0.878871	0.90374	0.903741	0.947963	0.92575	0.87499	1.07395	0.899907	0.74411	0.830538	1.03218	0.995494	0.90358	0.943153	0.962986	0.90916	0.967844	0.952474	1.03481	0.953219	1.08503	0.998513	1.00117	0.97283	1.03725	0.920894	0.865203
	sentence	0.93533	0.8521	0.741424	0.831088	0.996125	1.03079	1.01792	0.987007	1.07155	0.972698	0.926703	0.945536	1.02124	0.930903	1.05268	0.903277	0.998618	0.961836	0.968844	1.01074	0.854536	0.822413	0.948016	1.09775	0.840934	0.941936	0.96438	0.944667	0.81011	0.851907	0.839082	0.948377	1.09382	0.884861	0.91104	0.848998	0.987412	0.887456	1.09886	0.940539	0.93507	1.11006	1.03344	0.95216	0.865895	0.967591	0.995163	0.902843
		0.92267	0.872642	0.843022	0.865526	0.973349	0.955663	0.986594	0.945027	0.931046	0.985326	1.00327	0.981248	0.987038	0.955252	1.01546	0.972744	0.986355	0.956499	0.963097	0.944009	0.845688	0.850642	0.925878	1.00075	0.894449	0.933843	0.919685	1.00931	0.855009	0.798008	0.83481	0.990276	1.04466	0.894221	0.927097	0.905992	0.948286	0.92765	1.02567	0.987674	0.944145	1.09754	1.01598	0.976665	0.919362	1.00242	0.958028	0.884023
14. An article of furniture	chair	0.959149	1.00744	1.03564	1.04617	0.941503	0.841002	0.795148	0.991897	0.808801	0.962908	0.818155	0.940064	5.55112e-16	1.02963	0.985624	0.875616	0.817429	0.827608	1.01646	0.95466	0.878776	0.924591	0.977224	0.937947	0.802508	0.911453	0.853978	1.00078	0.918087	0.993247	0.886283	0.905381	0.90283	0.797274	1.11669	0.918706	1.00934	0.911184	0.790948	0.869954	1.04696	0.888582	0.903554	0.793575	0.966042	0.945628	1.05378	0.893301
	table	0.915493	0.903603	0.990447	0.918756	0.950386	0.859075	1.00519	1.05114	0.938837	0.880532	0.854256	0.963937	0.916016	0.991464	0.948565	0.953873	1.00942	0.98415	1.01165	0.945375	0.957919	1.00873	0.955109	0.88165	1.03163	1.0044	0.851252	0.844805	0.933456	0.981331	0.852794	1.0813	0.909827	0.925941	1.0492	1.01768	0.948862	0.900255	0.942644	0.816919	0.935567	0.912694	0.955799	0.962306	1.07977	1.09933	0.907963	0.853075
	couch	0.931134	0.923936	0.944653	0.959031	1.04523	0.990088	0.949848	0.772395	0.934663	0.894682	0.89224	0.961133	0.92378	0.895757	0.870572	0.938324	0.888516	0.910054	0.818146	1.05153	0.747726	0.769916	0.885882	0.944136	0.953398	0.865152	0.840534	0.814848	0.845924	0.841613	0.841649	0.942882	0.8765	0.994028	0.816726	0.848064	0.896112	0.787061	1.00978	0.767793	0.825881	0.865377	0.807891	1.01751	1.00541	0.97955	0.948884	0.792381
	bed	0.873025	0.716251	0.899702	0.901455	0.985175	1.09616	0.906242	0.99676	1.08644	0.958841	0.946919	1.04635	0.93207	0.937781	0.914326	0.948072	1.04103	0.977492	0.824436	0.917548	0.987479	0.925101	1.07809	0.967742	0.921165	0.76525	0.944594	0.975811	0.797849	0.832929	0.834676	0.574107	1.01809	0.990635	0.973725	0.92587	0.931931	0.847054	0.933938	1.0108	0.910723	1.05051	1.04914	0.982042	0.824169	0.934444	0.94291	0.913607
	sofa
		0.9197	0.887807	0.967611	0.956352	0.980573	0.946581	0.914108	0.953048	0.942185	0.924241	0.877893	0.97787	0.923955	0.963657	0.929772	0.928971	0.9391	0.924826	0.917672	0.967279	0.892975	0.907085	0.974076	0.932869	0.927176	0.886562	0.87259	0.909061	0.873829	0.91228	0.853851	0.875917	0.926811	0.92697	0.989087	0.92758	0.94656	0.861389	0.919326	0.866366	0.929783	0.92929	0.929095	0.938857	0.968848	0.989737	0.963385	0.863091
15. A part of the human body	leg	0.984537	0.990221	0.786464	0.898899	1.05803	1.04244	0.765357	0.869322	0.961456	0.825003	0.930172	0.988068	1.02963	1.44329e-15	0.92849	0.930299	0.939392	0.821576	0.949498	0.950277	0.719345	0.927329	0.855767	1.02471	1.12768	0.921868	0.809508	0.920542	0.735933	0.995001	0.870049	0.821101	0.948575	0.997747	0.972397	0.889788	1.0765	0.917111	0.948226	0.866615	0.916727	1.03231	0.883707	0.918651	0.916175	0.950509	0.98093	0.884373
	arm	0.950162	0.805374	0.845978	0.911489	0.982113	0.94827	0.908507	0.937366	0.897002	0.846505	0.9009	0.999066	0.950612	0.709884	0.982169	0.873461	1.01312	0.969411	0.915393	1.00033	0.672963	0.682847	0.87269	0.961902	0.949621	0.959301	0.910799	0.984963	0.838769	0.792986	0.81167	0.873932	0.840168	0.808657	0.904599	0.881244	0.933074	0.848794	0.885472	0.80384	0.903324	0.889697	1.01664	0.892458	0.98282	1.02601	0.985374	0.876833
	head	1.04781	1.04885	0.912668	0.937857	0.900339	0.828583	0.760273	1.0275	0.896581	0.975951	0.863214	0.918269	0.690778	0.938716	1.13711	1.00594	0.82869	0.863679	0.977732	1.04853	0.757307	0.949582	0.854813	0.933538	0.930561	0.788298	0.880822	0.78984	1.04098	0.94579	0.797206	0.948771	0.895644	0.933619	0.955364	1.01077	1.02994	0.887806	0.864846	0.848167	1.03226	0.815422	0.931292	0.909986	0.949969	0.884733	1.02443	0.904355
	eye	1.00161	1.053	0.984251	0.892561	0.862817	0.839996	0.996617	0.947051	0.88785	0.82086	0.944594	1.01321	0.964976	1.0208	0.926014	0.879989	0.991024	0.915447	1.01888	1.09344	0.783519	0.898099	0.898068	0.930772	1.04369	0.949345	0.90843	0.973032	0.945946	0.881216	0.75115	0.982608	1.02209	0.92436	1.01356	0.975816	0.921879	0.815858	0.883906	0.959729	0.945155	0.894041	0.988266	1.05026	0.899616	1.03248	0.966587	0.94203
	ear	0.958624	0.947089	0.934434	1.06067	0.835241	0.797369	0.917128	0.999787	0.791731	0.812575	0.779791	0.973017	0.881325	0.906834	0.804215	0.833014	0.89052	0.922682	0.928394	0.918753	0.792709	0.817224	0.899915	0.846517	0.847856	0.927203	0.91422	0.948544	0.944867	0.84441	0.860328	0.855366	0.719923	0.892606	1.00424	0.802801	0.896065	0.782928	0.829969	0.802075	0.94214	0.905085	1.04834	0.888983	0.935012	0.951134	0.942536	0.85172
		0.988549	0.968907	0.892759	0.940296	0.927707	0.891332	0.869576	0.956204	0.886924	0.856179	0.883734	0.978326	0.903464	0.894059	0.9556	0.904541	0.93255	0.898559	0.95798	1.00226	0.745169	0.855016	0.876251	0.939487	0.979882	0.909203	0.884756	0.923384	0.901299	0.891881	0.818081	0.896356	0.885279	0.911398	0.970032	0.912084	0.971491	0.850499	0.882484	0.856085	0.947921	0.907311	0.973649	0.932067	0.936718	0.968973	0.979972	0.891862
16. A fruit	apple	1.03082	0.899402	1.06232	0.99175	0.905771	0.92381	1.01535	0.99662	0.886649	0.969495	1.00753	0.964554	0.985624	0.92849	5.55112e-16	0.90805	1.01926	0.927745	0.932545	0.905445	0.928032	0.840563	0.944843	0.969776	0.94143	1.01748	0.898782	1.05681	1.01065	0.962855	1.02644	1.02179	0.881563	0.909235	1.01745	0.847937	0.934476	0.934992	0.917718	1.01582	1.02635	0.972368	0.850894	0.975804	0.989106	0.924822	1.05255	0.959684
	orange	0.980231	1.00774	0.872892	0.94021	1.01208	1.17253	0.782426	1.01485	1.10465	0.71964	0.928314	0.895801	0.915288	0.955682	0.979014	0.831704	1.02572	0.983064	0.931755	0.965494	1.10197	0.936981	0.902065	0.855068	0.856978	1.05878	0.900143	1.01051	0.923183	0.835406	0.969431	0.875741	0.972846	0.930056	0.972933	0.791825	0.941299	0.94937	0.982708	1.06711	0.919236	1.05863	1.01681	1.08109	1.02687	0.87543	0.924208	0.998778
	banana	0.969061	0.909823	0.697877	0.96476	0.916969	0.91177	0.98919	0.816604	0.898873	0.901631	0.797088	0.79418	0.987179	0.818348	0.910174	0.788844	0.962501	0.964568	0.78964	1.02953	0.747422	0.831689	0.765118	0.751859	0.820259	0.880915	0.795532	0.865599	0.82458	0.885226	0.745737	0.871892	0.905644	0.851326	0.942956	0.644808	0.895845	0.792295	1.01427	0.761962	0.859199	0.910441	0.950233	0.932786	0.944192	0.958345	0.911862	0.751409
	kiwi	1.00276	0.964136	0.887241	1.01069	0.795838	0.831267	0.775394	0.800322	0.921017	0.827014	0.89744	0.98008	0.85203	0.75747	1.0085	0.899369	0.939943	0.940766	0.920477	1.02938	0.853648	0.871956	0.945103	0.829662	0.872513	0.860394	0.866584	0.947092	0.892179	0.918652	0.815004	0.875351	0.94756	0.925666	0.93046	0.84305	0.916568	0.787674	0.753046	0.809579	0.889713	0.853908	0.85673	0.988158	0.954264	1.04297	1.00054	0.953743
	lemon	1.04392	1.0922	0.947404	0.989135	0.937911	0.921389	0.935664	0.901896	0.889672	0.961579	0.881419	1.06687	0.961301	0.868493	0.863728	0.856654	0.793956	0.874731	0.84454	1.01837	0.727123	0.670537	1.01479	0.977129	0.875664	0.983279	0.906849	0.968038	0.933329	0.739826	0.946262	1.03427	0.847149	0.811465	0.872421	0.909819	0.740609	0.905616	0.882031	0.804455	0.996313	0.830339	0.8522	0.980602	1.02734	1.00352	1.07166	0.939624
		1.00536	0.974661	0.893548	0.979309	0.913715	0.952154	0.899606	0.906058	0.940172	0.875872	0.902357	0.940297	0.940284	0.865696	0.940353	0.856924	0.948276	0.938175	0.883791	0.989645	0.871638	0.830345	0.914384	0.876699	0.873369	0.960169	0.873578	0.96961	0.916785	0.868393	0.900574	0.935809	0.910953	0.88555	0.947244	0.807488	0.88576	0.873989	0.909954	0.891785	0.938162	0.925136	0.905373	0.991688	0.988354	0.961017	0.992162	0.920648
17. A weapon	gun	1.0346	0.877565	0.908935	0.938378	0.841934	0.964768	0.828389	0.934428	1.00204	0.90159	0.628532	0.890423	0.875616	0.930299	0.90805	1.11022e-15	0.895169	0.979399	0.679709	0.96155	0.761037	0.847493	0.894982	0.981767	0.724091	0.909764	1.00951	0.922098	0.832639	0.962012	0.910596	0.929615	0.860305	0.811639	0.885363	0.833111	0.894649	0.701801	0.967122	0.690578	0.902168	0.980717	0.942146	0.930917	0.934662	0.95196	0.939233	0.896395
	sword	1.09974	0.989163	0.871756	0.934903	0.961348	1.02073	0.869146	0.842874	0.946936	0.916147	0.796018	0.957668	1.02702	0.836997	1.08307	0.813065	0.953326	0.982185	0.794004	1.08584	0.760064	0.78418	0.831216	0.917184	0.908801	0.843016	0.938602	1.04054	0.848928	0.861745	0.862145	0.924338	0.719523	1.01447	0.889768	0.864648	0.784786	0.739957	0.891979	0.675466	0.971219	0.997068	0.96336	1.00014	0.983333	1.01587	1.05751	0.811733
	rifle
	pistol
	bomb	1.01475	0.904371	0.960248	0.959209	0.873258	1.0755	0.987064	0.885881	1.00814	0.908407	0.860315	0.940337	1.035	1.02641	1.00792	0.876484	0.936756	1.04812	0.868381	1.01525	0.808378	0.885796	0.850073	1.00372	0.996815	0.867583	1.0682	0.907565	0.811696	0.98259	0.915968	0.940545	0.927378	0.98905	0.861255	0.930648	0.973363	0.847492	0.993745	0.859154	0.834828	0.95446	0.875097	1.01215	0.952434	0.885518	0.9058	0.977516
		1.04969	0.9237	0.913646	0.944163	0.89218	1.02033	0.894866	0.887728	0.985708	0.908715	0.761622	0.929476	0.979214	0.931236	0.99968	0.844775	0.928417	1.00323	0.780698	1.02088	0.776493	0.839156	0.858757	0.967557	0.876569	0.873454	1.00544	0.956736	0.831088	0.935449	0.896236	0.931499	0.835735	0.938387	0.878795	0.876135	0.884266	0.763083	0.950949	0.741733	0.902738	0.977415	0.926868	0.981072	0.95681	0.951117	0.967515	0.895215
18. An elective office	president	1.09691	0.970317	0.910684	1.12301	0.958488	0.972357	0.972629	0.939935	0.973031	0.940114	0.905777	0.913271	0.817429	0.939392	1.01926	0.895169	6.66134e-16	0.809637	0.929462	0.987841	0.787786	1.00035	0.891449	0.98513	0.945666	0.784341	0.953824	0.933822	0.986213	0.956901	1.06383	0.957843	0.914578	0.988207	1.02885	0.961738	0.943456	0.989684	1.00908	0.89214	0.970551	0.85801	0.943372	0.867676	1.09628	1.05331	1.04523	0.916472
	senator	0.929974	1.07754	0.98454	1.09384	0.960461	0.934145	0.840316	0.86357	0.617715	0.869636	0.957853	0.899746	0.558231	0.818114	0.934572	0.888391	0.805581	0.854068	1.01702	0.887945	0.798451	0.983222	0.972929	0.935777	0.949399	0.863692	0.973436	1.01283	0.9245	1.0087	0.892768	0.986862	0.919983	0.934173	1.05891	0.88311	0.994967	0.992557	0.98109	0.908882	0.819265	0.976031	0.863993	0.868824	1.00304	0.970702	0.962345	0.930976
	governor	1.01575	0.936511	0.907883	0.969614	0.997931	0.927756	0.873613	1.00954	0.868001	0.973986	1.00809	0.781733	0.897237	1.02433	1.01208	0.804435	0.80836	0.863983	0.947088	0.972944	0.837134	0.801933	0.90934	0.859603	1.00035	0.848837	1.01786	0.961024	0.880332	0.983589	0.953641	0.946334	0.951521	0.936156	0.965263	0.819985	0.991873	0.916643	1.10486	1.01307	1.0003	0.918253	0.942016	0.953511	0.99503	0.95687	0.978727	1.11313
	congressman	0.984733	0.981297	0.892183	0.952773	0.963678	0.974564	0.902442	0.897363	0.812733	0.914412	0.991036	0.850565	0.735713	0.874624	0.943194	0.925268	0.851845	0.772514	1.01776	0.936815	0.863074	0.993783	0.782819	0.974819	0.898561	0.840262	1.06399	0.976811	0.819241	0.968149	0.921642	1.01106	0.877111	0.925778	0.956571	0.796708	1.09839	0.961786	1.05687	0.944322	0.976675	1.00225	0.875914	0.852257	0.919667	0.932965	0.915795	0.939594
	mayor	0.995146	0.953332	0.951689	0.94229	1.00539	1.05059	0.869087	0.98936	0.943934	1.10354	1.03181	0.867116	0.905623	0.994621	1.02638	0.865503	0.853402	0.922048	0.993282	0.886544	0.905007	0.933082	0.935299	0.903137	1.04439	0.791624	0.951414	1.02087	0.943491	1.04314	0.93417	1.05428	0.888419	1.04239	0.99419	0.885918	0.895704	0.98162	1.1831	1.08025	1.03542	0.992431	1.00049	1.07275	1.08377	0.903999	1.01537	1.02513
		1.0045	0.983799	0.929396	1.0163	0.97719	0.971882	0.891617	0.939954	0.843083	0.960337	0.978914	0.862486	0.782847	0.930217	0.987097	0.875753	0.829797	0.84445	0.980921	0.934418	0.83829	0.942475	0.898367	0.931693	0.967673	0.825751	0.992103	0.981071	0.910756	0.992097	0.95321	0.991277	0.910322	0.965342	1.00076	0.869492	0.984878	0.968458	1.067	0.967731	0.960442	0.949395	0.925156	0.923004	1.01956	0.96357	0.983492	0.98506
19. A type of human dwelling	house	1.0008	0.91113	0.917146	1.05095	1.0841	1.04207	0.982833	0.884643	0.90499	0.93301	1.04263	0.88695	0.827608	0.821576	0.927745	0.979399	0.809637	8.88178e-16	0.966758	0.921954	0.7471	0.884105	0.891108	1.00436	0.957248	0.834586	0.888573	1.02043	0.847191	1.00009	0.870749	0.934406	0.871704	0.857767	0.958513	0.930533	0.964643	1.00238	1.0167	0.707877	0.969188	0.947873	0.982872	0.818325	0.916515	1.04096	1.03341	1.03136
	home	0.895989	0.936525	0.823441	0.977862	0.963649	1.06335	0.929109	0.946758	0.989504	0.934715	1.03259	0.84436	0.994428	0.933991	1.0125	0.893921	0.967435	0.919163	0.970028	0.992854	0.810345	0.714221	0.943872	0.915089	1.02688	0.851725	0.952775	0.99828	0.847328	0.911283	0.893347	0.923875	0.963804	1.04483	0.963584	0.852538	0.961128	0.844313	1.1149	0.942829	0.903459	1.05165	1.00224	1.04586	0.952774	0.767933	0.926773	0.993977
	apartment	0.848532	0.846713	0.781347	0.866364	0.985233	0.985685	0.984113	0.800221	0.992054	0.905506	0.943819	0.910991	1.03595	0.917444	0.933852	0.975555	1.01609	0.940914	0.873955	0.996341	0.776945	0.950494	0.881679	0.832863	0.944098	0.932693	0.687346	0.920769	0.797326	0.839676	0.664509	1.01139	0.9687	0.972963	0.847809	0.965216	0.701978	0.787742	0.904635	0.860269	0.911058	0.979763	1.04788	1.00749	0.944955	0.934209	0.96813	0.739227
	condo	0.901621	0.892613	0.757353	0.873558	0.967126	0.950555	0.839511	0.852945	0.951388	0.876801	0.832497	0.758676	0.908154	0.724873	0.943028	0.774185	0.935416	0.990549	0.844333	1.01071	0.722979	1.07221	0.752877	0.910719	0.975143	0.819712	0.771215	0.960778	0.811803	0.974771	0.856278	0.818511	0.897536	0.913803	0.95751	0.751636	0.879847	0.739385	0.855947	0.757631	0.868741	0.86941	0.911977	1.00812	0.813813	0.922511	0.887115	0.887925
	mansion	1.06307	1.03673	0.970494	0.880568	0.938303	1.00025	0.851514	0.930132	1.05069	0.87557	0.843291	0.706824	0.876803	0.948505	1.0638	0.756673	0.944695	0.892786	0.915405	1.01274	0.771074	0.87555	0.866787	0.778038	0.896623	0.995412	0.896663	0.946019	0.830153	1.05991	0.931223	1.00536	0.929245	0.946162	0.952833	0.760251	0.96773	0.811636	1.01009	0.755384	0.950367	0.936254	1.01686	0.923949	1.05372	0.689174	0.999065	0.854985
		0.942002	0.924741	0.849956	0.92986	0.987681	1.00838	0.917416	0.88294	0.977724	0.90512	0.938966	0.82156	0.928588	0.869278	0.976185	0.875947	0.934655	0.935853	0.914096	0.98692	0.765688	0.899317	0.867265	0.888213	0.959999	0.886826	0.839315	0.969255	0.82676	0.957146	0.843221	0.938708	0.926198	0.947106	0.93605	0.852035	0.895065	0.83709	0.980455	0.804798	0.920563	0.956989	0.992368	0.960749	0.936356	0.870957	0.962898	0.901495
20. An alcoholic beverage	beer	1.04371	0.934788	0.827003	0.918703	0.799985	0.941484	0.969339	0.840671	1.01566	0.928783	0.784243	0.948894	1.01646	0.949498	0.932545	0.679709	0.929462	0.966758	1.11022e-15	0.96143	0.804739	0.872634	0.958794	0.838242	0.744755	1.02579	0.935746	0.904111	0.910475	0.780304	0.937372	0.94297	0.935381	0.890703	0.770021	0.804881	0.704742	0.785829	0.942458	0.778894	0.853698	1.02519	1.06638	1.11756	0.978959	0.941708	0.976146	0.805019
	wine	0.932394	0.888258	0.861565	0.803349	0.862227	0.944091	0.923486	0.771423	1.02454	0.946529	0.814151	0.849168	0.989702	0.90916	1.08317	0.765888	0.979553	0.955305	0.768138	1.03609	0.799949	0.860053	0.820459	0.914091	0.939635	0.984587	0.83803	0.950027	0.885608	0.885899	0.74353	0.953377	0.912677	0.94223	0.979216	0.789825	0.753019	0.81849	0.920125	0.775939	0.937805	0.877801	1.06058	1.05796	1.01347	0.941433	0.931969	0.720029
	bud	0.96544	1.01502	0.71575	0.970316	0.885093	0.928878	0.907721	0.905132	0.911316	0.779464	0.82868	0.991855	0.910361	0.790604	0.979286	0.888258	0.849073	0.917051	0.77378	0.978796	0.598075	0.949278	0.834307	0.746121	0.785797	0.745312	0.997065	0.914387	0.711349	0.778333	0.846443	0.799616	0.91723	0.971264	0.948333	0.910935	1.06905	0.807096	0.847094	0.813362	0.855027	0.953771	0.81017	0.8355	0.894554	0.916995	1.0747	0.895643
	pint	1.17612	0.935694	0.929319	0.833155	0.826688	1.0173	0.924131	0.861209	1.08903	0.87857	0.850262	0.904069	0.949788	0.947068	0.967752	0.780933	0.937583	0.992397	0.70494	1.17884	0.814007	0.847679	0.969743	0.88097	0.886232	0.949059	0.929282	0.959042	0.936433	0.85442	0.814288	0.827449	0.85239	0.97847	0.937051	0.895484	0.760683	0.829188	0.835181	0.761418	0.99996	0.875382	1.02869	1.13037	0.986962	1.00367	1.06129	0.673152
	liquor	1.02409	0.843149	0.92414	0.870992	0.965066	1.09666	0.930385	0.937714	1.08655	1.01445	0.807391	0.908303	1.00284	0.949651	0.856986	0.536065	0.915805	0.999486	0.541119	0.988169	0.792957	0.845952	0.946243	0.911065	0.794673	0.971007	0.918208	0.974435	0.865232	0.928665	0.957424	0.906226	0.947052	0.989111	0.897672	0.870823	0.736566	0.755709	0.979267	0.860754	0.953926	0.974118	1.07259	0.933699	1.03224	0.902973	1.01873	0.831054
		1.02835	0.923382	0.851555	0.879303	0.867812	0.985683	0.931013	0.86323	1.02542	0.90956	0.816945	0.920458	0.97383	0.909196	0.963949	0.730171	0.922295	0.9662	0.696994	1.02867	0.761946	0.875119	0.905909	0.858098	0.830218	0.935152	0.923666	0.9404	0.861819	0.845524	0.859812	0.885928	0.912946	0.954356	0.906458	0.854389	0.804811	0.799263	0.904825	0.798074	0.920083	0.941252	1.00768	1.01502	0.981238	0.941356	1.01257	0.784979
21. A country	usa	1.06145	0.97455	0.95548	1.06082	1.01391	0.942002	1.01419	1.05735	0.888356	0.92429	1.0221	1.02163	0.95466	0.950277	0.905445	0.96155	0.987841	0.921954	0.96143	2.22045e-16	1.05002	1.01892	0.9571	1.03899	0.9724	0.992123	1.02698	1.06474	0.978153	1.07342	1.05605	1.07603	0.888506	0.988757	0.942622	0.939225	0.976892	1.04215	1.06277	1.02984	1.02763	1.12285	0.983744	0.998676	0.989053	0.997071	1.14728	1.0783
	canada	0.992889	0.968525	1.03996	1.00178	1.0089	0.937128	0.905147	0.941321	0.961101	0.8113	1.03656	1.04785	0.944557	0.935039	0.863895	0.944725	0.949279	0.947817	1.03607	0.851735	1.04934	0.997169	0.950043	1.03628	1.00463	0.96387	0.963877	1.02809	1.01412	1.0777	0.899242	0.960074	1.00629	0.998683	0.987847	0.943673	1.02539	0.832486	1.0297	1.02068	0.864453	1.05822	0.889698	0.9315	1.0057	1.04935	0.937785	1.11253
	france	1.0633	0.934531	0.987264	1.04973	0.976127	0.944365	1.03054	0.945014	0.954219	0.991916	0.877752	1.0408	0.964224	1.01147	0.894743	0.974346	0.839119	0.996474	0.982919	0.784286	0.913908	1.0174	0.986105	1.01549	0.887861	0.906892	1.00905	0.992405	0.951814	1.00064	1.0218	0.899035	0.961339	1.06123	1.045	0.998494	1.01323	0.893119	1.02529	0.988805	0.928584	0.968455	0.981904	0.901957	0.93642	1.00552	0.994776	0.938306
	spain	0.994563	0.896579	0.933631	0.888883	1.08664	0.975731	1.03345	0.999297	1.04662	0.9227	0.961957	1.01796	1.11192	0.981337	0.981752	1.02958	0.85105	0.970552	0.981218	0.74332	1.00523	1.01721	0.929916	1.02511	0.971753	0.99472	0.980856	0.923328	0.909331	1.06221	0.962547	0.926941	0.923857	1.03415	0.912938	1.04351	1.01755	0.96529	1.02875	0.989866	0.876463	1.10826	0.974148	0.844636	0.924043	1.01411	0.971781	1.02591
	germany	1.06494	0.973702	0.973222	0.979399	0.967897	0.905239	1.05503	0.911384	1.02864	0.966154	0.871682	0.972126	1.06184	1.01512	0.917919	0.966939	0.953938	0.964559	0.943108	0.730317	0.9728	1.06739	0.953985	1.03046	0.912809	0.852478	1.05839	0.975105	0.982462	1.08252	1.01521	0.911555	0.955075	1.04224	0.994367	0.96724	1.10627	0.972641	0.960921	0.899023	0.932165	0.967108	0.992633	0.86939	0.899861	1.0298	1.02495	1.01631
		1.03543	0.949577	0.977911	0.996122	1.0107	0.940893	1.00767	0.970873	0.975786	0.923272	0.95401	1.02007	1.00744	0.978647	0.912751	0.975428	0.916245	0.960271	0.980949	0.777415	0.99826	1.02362	0.95543	1.02927	0.94989	0.942016	1.00783	0.996733	0.967176	1.0593	0.990969	0.954727	0.947013	1.02501	0.976555	0.978429	1.02787	0.941136	1.02149	0.985644	0.925859	1.04498	0.964425	0.909232	0.951016	1.01917	1.01531	1.03427
22. A crime	robbery	0.971712	0.945792	0.782504	1.00503	0.942084	0.919574	0.926002	0.854963	0.80222	0.91822	0.841494	0.871246	0.878776	0.719345	0.928032	0.761037	0.787786	0.7471	0.804739	1.05002	2.22045e-16	0.711571	0.738987	0.855879	0.840259	0.771975	0.821185	1.00507	0.732615	0.875282	0.784721	0.836464	0.795619	0.826118	0.86071	0.769319	0.835276	0.661686	0.852576	0.591472	0.873726	0.899936	0.96061	0.899317	0.943304	0.804078	0.983621	0.795326
	theft	0.982704	0.931589	0.946782	0.85782	0.854289	0.859804	0.679123	0.90245	0.866323	0.88506	0.752566	0.916251	0.820039	0.936548	0.958079	0.619568	0.960384	1.00286	0.91476	1.105	0.67074	0.809368	0.821407	0.867343	0.718683	0.848216	0.865663	1.04008	0.857235	1.02396	0.91909	0.769502	0.809884	0.86639	1.11183	0.72825	0.768324	0.724652	0.777381	0.754977	0.993702	0.823899	1.00629	1.07172	0.818916	0.885729	0.999591	0.880489
	homicide	0.974853	0.954122	0.983408	1.02558	1.02496	1.00474	0.877936	0.925487	1.05081	0.963897	0.951402	0.729821	1.00582	0.906701	1.05212	0.887036	0.868611	0.919489	0.989679	0.997724	0.764823	0.855946	0.907394	1.02297	0.921344	0.867496	0.992097	1.04429	0.934964	1.09106	0.956856	0.911778	0.905366	1.04945	0.949218	0.834694	0.930644	0.942606	1.01692	0.744924	0.950532	0.943566	1.01153	0.853149	0.909127	0.983224	0.960967	0.953934
	murder	0.987549	0.973501	0.744643	0.96413	0.921723	0.975545	0.779223	0.835196	0.972838	1.05552	0.900514	0.846284	0.959269	0.839045	1.04107	0.84131	0.933796	0.947169	0.936362	0.980583	0.671708	0.997353	0.742551	0.862984	0.88728	0.746685	0.875454	0.985192	0.806578	0.957782	0.898868	0.875677	0.929491	0.828356	0.96316	0.864311	0.965265	0.798097	0.954925	0.856902	1.01988	0.831174	0.983977	1.03245	0.840445	0.842703	1.00064	0.964736
	killing	1.02619	0.987541	0.876075	0.970999	0.767922	0.936262	0.992396	0.913992	0.987482	0.858781	0.956669	0.930237	1.00503	0.999458	1.07922	0.906323	0.907652	0.99905	0.890571	1.00819	0.844716	0.986333	0.866315	0.930962	1.01814	0.889608	1.09535	1.11502	0.864648	0.857707	0.922822	0.874904	0.972405	0.977871	1.00448	1.00182	0.876452	0.78591	1.01542	0.80715	0.989607	1.02617	1.0046	1.00219	0.891359	1.04064	0.990019	0.925576
		0.988602	0.958509	0.866683	0.964712	0.902195	0.939184	0.850936	0.886417	0.935935	0.936296	0.880529	0.858768	0.933786	0.880219	1.0117	0.803055	0.891646	0.923133	0.907222	1.0283	0.737997	0.872114	0.815331	0.908028	0.877141	0.824796	0.92995	1.03793	0.839208	0.961158	0.896471	0.853665	0.882553	0.909638	0.97788	0.839679	0.875192	0.78259	0.923444	0.751085	0.965489	0.90495	0.993401	0.971764	0.88063	0.911276	0.986967	0.904012
23. A carpenter's tool	hammer	1.00588	0.867843	1.00044	0.936607	0.89944	0.937168	0.87912	1.03179	0.807151	0.9704	0.886972	1.00707	0.924591	0.927329	0.840563	0.847493	1.00035	0.884105	0.872634	1.01892	0.711571	8.88178e-16	0.993861	0.969064	0.81827	1.00041	0.869761	0.973599	0.895783	0.770036	0.902537	1.03678	0.734718	0.870006	0.904987	0.769501	0.924332	0.849312	0.94137	0.787568	0.961682	0.988547	0.921742	0.958286	1.01717	0.851946	1.00614	0.927643
	nail	1.00617	0.928204	0.881373	0.883609	0.999728	1.00405	1.04507	0.934282	0.898498	0.902651	0.963972	0.916689	1.04217	0.967789	0.914395	0.718502	0.934215	0.888709	0.823275	0.986432	0.752995	0.992642	0.897629	0.941585	0.877217	0.923624	0.8682	1.05262	0.935682	0.910688	0.8244	0.968141	0.948606	0.914628	0.848061	0.904636	0.729284	0.875471	0.984677	0.886382	1.02963	1.01478	0.871497	1.01483	1.01903	0.984086	1.01598	0.957881
	drill	0.959526	1.05146	1.08434	0.939946	0.836121	1.01301	0.861369	0.982702	0.867237	0.877363	0.893511	1.05823	0.83785	0.921321	0.975616	0.995942	0.875084	0.961087	0.906532	0.906091	0.890155	0.827859	0.915184	0.937232	0.801739	0.98891	0.934364	0.917133	0.954967	0.89579	0.838789	0.974066	0.852499	0.88526	0.99137	0.978721	0.948084	0.944349	0.930959	0.908721	0.952246	1.02535	0.869338	1.01369	1.07587	0.898202	1.0539	0.879968
	wrench
	screw	0.964083	0.948853	0.970171	0.868754	0.93114	0.945048	1.06921	0.921282	0.945741	0.948448	0.977277	0.906824	0.95125	1.10778	0.982247	1.02578	0.935115	0.900761	0.912076	0.858962	0.793493	0.867946	0.918689	0.856366	0.871087	0.916326	0.901532	1.05805	0.895029	0.873713	0.874323	1.04713	0.867292	0.916124	0.955859	0.879185	0.989387	0.872144	1.0077	0.891088	0.899035	0.9646	1.03826	0.957894	0.959537	0.925063	0.967611	0.777358
		0.983914	0.949089	0.98408	0.907229	0.916607	0.974818	0.963694	0.967515	0.879657	0.924715	0.930433	0.972204	0.938964	0.981055	0.928205	0.896929	0.936192	0.908666	0.87863	0.942602	0.787054	0.896149	0.93134	0.926062	0.842078	0.957316	0.893464	1.00035	0.920365	0.862557	0.860012	1.00653	0.850779	0.896505	0.925069	0.883011	0.897772	0.885319	0.966177	0.86844	0.960649	0.998318	0.925209	0.986174	1.0179	0.914824	1.01091	0.885713
24. A member of the clergy	priest	1.04614	0.978652	0.670967	0.913606	0.914385	0.99001	0.94182	0.929209	0.959162	0.845576	0.847218	0.547934	0.977224	0.855767	0.944843	0.894982	0.891449	0.891108	0.958794	0.9571	0.738987	0.993861	5.55112e-16	0.86705	0.850304	0.74166	0.881189	0.875415	0.673891	0.908689	0.768475	1.00045	0.865805	0.862072	0.981637	0.781024	0.862143	0.741179	1.01721	0.860567	1.01241	0.979966	0.903612	0.917397	0.850911	0.859644	0.965958	0.918993
	minister	0.95334	0.970559	0.977682	1.07418	1.0192	1.02511	0.769945	0.939647	1.01133	1.0543	0.870556	1.0119	0.885027	0.9158	1.05742	1.07548	0.772709	0.978002	0.91592	1.08734	1.00605	1.01648	0.906513	0.981629	0.974672	0.784881	0.899231	0.974547	1.00321	1.00035	0.9217	0.850953	1.03796	0.98849	0.940023	1.01012	0.985917	0.900834	0.983222	1.03208	0.984221	0.881612	1.0151	1.01767	1.07535	1.05494	0.950039	1.0369
	pastor	0.957713	0.924955	0.818094	1.00593	0.929878	1.02514	0.934034	0.940574	0.995448	0.962171	0.963317	0.230648	0.898255	0.931121	0.925999	0.875269	0.91286	0.81192	0.969764	0.995739	0.791152	0.912389	0.553791	0.95353	1.04124	0.846477	1.05754	0.960635	0.819305	0.990677	0.885021	1.03397	0.94239	1.05672	0.904973	0.796338	0.924616	0.837756	0.968883	0.844608	1.03823	0.945131	0.938668	0.907761	0.971506	0.911542	0.934764	0.948344
	monk	1.05167	0.895993	0.697566	0.945482	1.00029	1.00791	0.742434	0.985408	0.99772	0.920455	0.845437	0.747703	0.960736	0.781694	1.10206	0.820945	0.842095	0.912797	0.885372	0.958011	0.720253	0.893994	0.722105	0.846777	0.947977	0.67154	1.01214	0.948939	0.766845	0.934112	0.739942	0.849296	0.778774	0.924005	0.846681	0.821013	1.05117	0.77563	0.896689	0.81021	0.891926	0.911401	0.928041	0.913097	0.863455	0.963455	0.965019	0.95307
	preacher	0.92863	0.98042	0.729732	0.976909	0.878731	0.981529	0.898299	0.823122	1.03783	0.909244	0.80034	0.550352	0.956006	0.806265	1.04026	0.739073	0.802782	0.877324	0.82139	1.04974	0.690584	0.909216	0.596075	0.945999	0.8778	0.828161	1.01333	0.939954	0.721698	0.978646	0.896375	0.965341	0.901883	0.996147	0.890098	0.740858	0.89779	0.719072	0.991101	0.682548	0.9166	0.909812	0.965912	0.807304	0.833369	0.784606	0.974636	0.856606
		0.987498	0.950116	0.778808	0.983221	0.948498	1.00594	0.857306	0.923592	1.0003	0.938349	0.865373	0.617708	0.93545	0.858129	1.01412	0.881149	0.844379	0.89423	0.910248	1.00959	0.789405	0.945188	0.694621	0.918997	0.938399	0.774544	0.972684	0.939898	0.796989	0.962494	0.842303	0.940003	0.905362	0.965487	0.912682	0.829871	0.944327	0.794894	0.971421	0.846003	0.968677	0.925584	0.950267	0.912646	0.918919	0.914837	0.958083	0.942782
25. A substance for flavoring food	salt	0.976785	1.03842	0.888612	1.08538	0.773891	0.868461	0.98143	0.826187	0.844719	0.93451	0.878744	0.818195	0.937947	1.02471	0.969776	0.981767	0.98513	1.00436	0.838242	1.03899	0.855879	0.969064	0.86705	8.88178e-16	0.919403	0.953709	0.84368	0.913356	0.909987	0.8471	0.878233	0.932567	0.91436	0.851378	1.07021	0.830843	0.722436	0.865828	0.894343	0.984114	0.992016	0.867219	0.955639	1.00877	1.03811	0.8842	1.05535	0.92639
	pepper	0.996511	0.80452	0.834978	0.991901	0.845181	0.994212	0.792621	0.825079	0.815928	0.929566	0.6408	0.845516	0.851201	0.923319	0.873976	0.687545	0.985211	0.976199	0.775551	1.03731	0.755509	0.798753	0.799332	0.850323	0.70381	0.861824	0.79736	0.930403	0.804399	0.845622	0.980648	0.878335	0.917078	0.906649	0.856153	0.72207	0.718068	0.762576	0.84419	0.791521	0.917987	0.912873	1.0327	1.02592	0.883507	0.751474	0.973257	0.808105
	spice
	sugar	1.09231	1.0131	1.01699	0.963208	0.874854	0.920026	1.04658	0.883748	0.832253	0.986633	0.961718	0.879032	0.941968	0.900946	0.951022	0.958014	1.01781	1.04325	0.903751	1.1362	0.884319	0.916239	0.96029	0.910035	0.980894	1.01781	0.97167	0.939809	0.962134	0.906126	1.05497	0.79132	0.976935	1.01984	0.933483	0.865339	0.913691	0.875288	0.84236	0.820506	0.936957	0.863778	0.901169	0.936591	0.832246	1.01458	1.05837	1.01478
	herbs	1.10728	1.03384	0.984163	0.990543	0.799553	0.907464	0.986766	0.94439	0.90673	1.0585	1.00264	0.941284	1.01748	0.909347	0.967259	0.941767	1.09573	1.03735	0.810975	1.06859	1.00313	1.08439	0.886451	0.789005	0.929532	0.958484	1.0186	1.05659	1.00123	0.978307	0.944905	0.80489	0.937957	0.951667	1.0198	0.919606	0.781169	0.879463	0.814506	0.907616	1.01458	0.922806	0.950559	1.06235	0.885112	1.05381	1.04954	0.938797
		1.04322	0.97247	0.931185	1.00776	0.82337	0.922541	0.95185	0.869851	0.849907	0.977302	0.870977	0.871007	0.937148	0.93958	0.940509	0.892273	1.02097	1.01529	0.83213	1.07027	0.87471	0.942111	0.878281	0.849788	0.88341	0.947956	0.907828	0.96004	0.919436	0.894289	0.964689	0.851778	0.936583	0.932384	0.969911	0.834464	0.783841	0.845789	0.84885	0.875939	0.965385	0.891669	0.960016	1.00841	0.909744	0.926017	1.03413	0.922017
26. A fuel	gas	1.10344	0.891818	0.933008	0.995902	0.895291	1.03566	0.826318	0.923399	0.814859	0.859143	0.72686	0.990517	0.802508	1.12768	0.94143	0.724091	0.945666	0.957248	0.744755	0.9724	0.840259	0.81827	0.850304	0.919403	6.66134e-16	0.999523	0.920664	1.03261	0.809891	0.855883	0.97107	0.818504	0.884872	0.717452	0.875138	0.759452	0.811783	0.70953	0.928653	0.778611	0.876868	0.986932	0.950497	1.02324	0.934065	1.00023	1.05767	0.742147
	petrol	1.05612	0.902914	0.946396	0.882724	0.901728	0.958384	1.02237	0.825043	0.891706	0.956674	0.765083	0.978082	0.884604	1.14266	0.821504	0.810752	0.849058	0.953657	0.713906	1.00921	0.904257	0.890142	0.962748	0.966174	0.661658	1.10591	0.838837	0.934968	1.00592	0.881186	0.935955	0.963724	0.946953	0.834152	1.0169	0.878898	0.713535	0.81776	0.821607	0.862675	0.970499	0.941763	0.962802	1.03833	1.04147	1.00516	1.05877	0.718477
	electricity	0.999146	0.897354	1.00746	0.976966	0.890134	0.960663	1.0072	0.957438	0.950426	0.982463	0.920431	0.98268	1.01721	1.00839	0.802648	0.937074	0.984244	0.959919	0.844368	0.995328	0.826174	0.724271	0.954498	0.875487	0.676485	0.931662	0.791918	1.03253	0.945736	1.00047	0.913304	0.804979	0.868377	0.838025	0.962367	0.850264	0.579788	0.737432	0.971436	0.82237	0.92102	0.962418	0.959376	0.944844	1.01283	1.0668	1.02032	0.802217
	oil	0.984235	1.0133	1.01232	1.11695	0.874646	0.958977	0.961423	1.0227	0.916839	0.941233	0.853789	1.01405	0.81286	1.06712	0.940692	0.761234	0.860254	0.971426	0.78141	0.897765	0.874299	0.886005	0.886302	0.945287	0.604202	0.895529	0.931836	0.926238	0.994882	0.979095	1.02328	0.875319	0.899076	0.809631	0.894102	0.839783	0.831994	0.78793	0.956471	0.846008	0.967636	1.10036	0.973516	0.849388	0.90867	0.919976	0.885188	0.837348
	coal	0.940047	0.966283	1.05868	0.967681	0.893903	0.82112	1.0039	0.942679	0.953811	0.840896	0.989101	0.979231	0.939012	0.895198	0.856114	0.825208	1.0391	1.02028	0.91346	0.882515	0.810586	0.827703	0.890978	0.935332	0.7591	1.08589	0.794939	0.975646	0.838756	0.956503	0.902317	0.879665	0.862184	0.964005	0.909125	0.909463	0.84426	0.707001	0.921842	0.734209	0.860598	1.09394	1.01623	0.84394	0.896682	0.983688	0.964749	0.859728
		1.0166	0.934333	0.991574	0.988044	0.89114	0.94696	0.964243	0.934252	0.905528	0.916082	0.851053	0.988911	0.891238	1.04821	0.872478	0.811672	0.935665	0.972506	0.79958	0.951444	0.851115	0.829278	0.908966	0.928337	0.675362	1.0037	0.855639	0.980398	0.919037	0.934627	0.949186	0.868438	0.892293	0.832653	0.931525	0.847572	0.756272	0.751931	0.920002	0.808775	0.919324	1.01708	0.972485	0.939948	0.958743	0.99517	0.997339	0.791983
27. An occupation or profession	doctor	1.01719	0.846439	0.651892	1.01869	0.921115	1.00421	0.823758	0.939904	1.05122	0.967921	0.843848	0.895109	0.911453	0.921868	1.01748	0.909764	0.784341	0.834586	1.02579	0.992123	0.771975	1.00041	0.74166	0.953709	0.999523	7.77156e-16	0.931694	0.984709	0.792864	0.96818	0.716812	0.788995	0.901211	1.05315	0.927535	0.921182	1.00282	0.830886	0.949192	0.940853	1.05109	0.857869	0.945747	0.931569	0.632659	0.929765	1.00166	1.047
	teacher	0.960565	0.954566	0.572234	0.935093	1.07146	0.895496	0.903014	0.893164	0.99888	0.938033	0.834944	0.863841	0.885524	0.964978	1.0207	1.03994	0.967144	1.03125	0.988003	0.997372	0.964235	1.01867	0.791025	0.873021	0.963163	0.731937	0.956135	0.921014	0.872839	0.858122	0.845091	0.977058	0.870033	0.976082	0.974544	0.812005	1.03876	0.921204	0.942197	1.01156	1.05259	0.915665	1.04955	0.910728	0.83931	0.795926	0.934594	0.88474
	nurse	0.939388	0.769644	0.536878	0.91837	1.00386	0.964819	0.746483	0.924463	1.04414	0.924523	0.832639	0.931281	0.934902	0.817781	1.01949	0.92012	0.910439	0.970237	0.990471	0.930994	0.828626	0.923614	0.771554	0.969131	0.989408	0.358618	0.957198	1.02239	0.715719	0.86578	0.622541	0.753927	0.940099	0.942605	0.897571	0.939704	0.978538	0.760669	0.964056	0.900786	1.0077	0.961253	0.972378	0.995767	0.722213	0.901202	0.952222	0.935678
	professor	0.920381	1.0118	0.880806	0.923787	0.839197	0.793934	0.712597	0.978584	0.843352	1.06748	0.891298	0.996425	0.811194	0.930708	1.03551	0.964044	0.931764	1.0818	0.926762	0.998414	0.82454	0.982543	0.964629	0.935432	1.00104	0.713157	0.889034	0.952226	0.937314	0.940257	0.945408	0.967932	1.02912	1.05588	1.04484	1.0205	1.02468	0.945228	0.504458	0.979714	1.06154	0.639118	0.735325	1.04621	0.816454	0.880961	1.00066	1.06286
	psychologist	0.990464	1.08135	0.964923	1.00505	0.758018	0.751936	0.964963	0.988224	0.970877	1.00765	0.908013	1.03565	0.923501	0.975813	0.923497	1.02195	0.933571	0.953203	0.894716	1.18718	0.922324	0.762339	0.966559	0.91481	0.956684	0.853857	0.924981	0.852977	0.942856	0.919429	0.821914	1.04508	0.790537	1.01156	0.907654	0.92999	0.949989	0.93681	0.801617	0.807078	0.962878	0.875052	0.865118	0.988874	0.860192	1.12885	0.964213	0.917273
		0.965598	0.93276	0.721347	0.960197	0.918729	0.88208	0.830163	0.944868	0.981694	0.981122	0.862148	0.944461	0.893315	0.92223	1.00334	0.971163	0.905452	0.974215	0.965149	1.02122	0.86234	0.937514	0.847085	0.929221	0.981963	0.664392	0.931808	0.946663	0.852319	0.910354	0.790353	0.906598	0.9062	1.00786	0.950429	0.924677	0.998955	0.878959	0.832304	0.927997	1.02716	0.849791	0.913623	0.974629	0.774166	0.927341	0.970671	0.969509
28. A natural earth formation	mountain	0.836474	0.941765	0.95361	0.749133	0.995581	0.805689	0.957387	0.770718	0.916735	0.899284	0.824585	0.994478	0.853978	0.809508	0.898782	1.00951	0.953824	0.888573	0.935746	1.02698	0.821185	0.869761	0.881189	0.84368	0.920664	0.931694	3.33067e-16	0.767782	0.818989	0.946438	0.848478	0.977697	0.974978	0.852005	1.01405	0.852909	0.727625	0.871627	0.866159	0.897372	0.876755	0.933311	0.938789	0.98389	0.982993	0.812236	0.850089	0.778591
	river	0.812949	1.00102	0.803536	0.930128	0.871506	0.904885	1.05655	0.934838	0.988592	0.982377	0.884505	0.688939	0.994848	1.00894	1.05504	0.881005	0.914024	1.08938	0.853539	1.02052	0.848352	1.04044	0.825508	0.801549	0.932598	1.02475	0.809249	0.911563	0.95977	1.04047	0.948094	0.893376	1.04695	0.961104	0.931782	0.899586	0.687522	0.838735	0.973072	0.881013	0.930682	0.84144	0.969106	0.917241	1.02673	0.893687	0.713217	0.766838
	lake	0.963463	1.03868	0.844313	0.948118	0.897949	0.971346	0.888886	0.90253	0.964022	0.969472	0.912688	0.788754	0.821537	0.969294	0.967926	0.91712	0.99228	0.968164	0.930616	0.870997	0.886132	0.935388	0.929522	0.447118	0.907663	0.99925	0.834912	0.884272	0.874058	1.0023	0.929067	1.01265	0.99119	0.878638	0.977388	0.833199	0.748227	0.91013	0.988044	0.941184	1.01737	0.971984	0.946876	0.916442	1.08701	0.769765	0.968691	0.860364
	hill	0.953409	0.992615	0.988258	0.859011	0.906127	0.960432	0.955128	0.965549	0.963904	1.02666	0.906468	0.921812	0.853629	0.8781	0.968063	0.985884	0.912576	0.798543	1.0728	1.05471	0.892172	0.863616	0.967436	1.00022	0.997903	0.921127	0.885289	0.944246	0.952458	0.987956	0.897178	0.966398	0.955524	0.840687	0.922887	0.906883	1.11038	0.912542	0.878741	0.860314	1.11661	0.935277	0.893577	0.861642	0.920474	0.809003	0.885607	0.956203
	valley	1.0211	0.992379	0.992941	0.831018	1.00594	1.01054	0.859947	1.00803	1.00209	0.918741	0.961066	0.835619	0.896233	0.870414	0.896935	0.92789	1.05397	1.04407	1.03086	0.948644	1.00406	0.957147	0.914724	0.931737	0.989473	1.00511	0.767043	0.861407	0.824718	0.958475	0.834451	0.895796	1.02843	1.00196	0.966423	0.875383	0.928089	0.913419	1.00995	1.01677	1.00298	1.00131	1.01464	0.967614	1.03702	0.725164	0.903759	1.00777
		0.91748	0.993292	0.916532	0.863482	0.93542	0.930578	0.94358	0.916333	0.967069	0.959307	0.897862	0.84592	0.884045	0.907252	0.957349	0.944283	0.965335	0.957747	0.964712	0.98437	0.890381	0.933271	0.903676	0.804861	0.94966	0.976386	0.824124	0.873854	0.885999	0.987128	0.891454	0.949183	0.999414	0.90688	0.962506	0.873592	0.840369	0.889291	0.943194	0.919331	0.98888	0.936664	0.952598	0.929366	1.01085	0.801971	0.864273	0.873953
29. A sport	football	1.03595	1.02908	0.885942	0.977589	0.872226	0.865212	0.98768	0.998177	1.0586	0.887077	0.782365	0.980262	1.00078	0.920542	1.05681	0.922098	0.933822	1.02043	0.904111	1.06474	1.00507	0.973599	0.875415	0.913356	1.03261	0.984709	0.767782	2.22045e-16	0.876401	0.971122	0.985084	1.05561	0.981724	0.9213	0.857533	0.8776	1.00956	0.993716	0.949593	0.873969	0.933532	0.926955	0.938822	0.893061	0.969864	0.830357	0.926121	1.00011
	basketball	0.982308	1.01502	0.928283	0.919726	0.894733	0.945287	0.931374	0.903281	1.0245	0.875889	0.834872	0.924269	0.959594	0.923458	1.01102	0.93734	0.992705	1.1232	0.85268	1.06297	1.03965	0.980964	0.912265	0.861179	1.02251	1.02977	0.769064	0.367394	0.938592	0.94178	1.01436	1.06739	1.02906	0.981674	0.906671	0.911209	1.0004	0.982237	0.891291	0.897684	0.908741	0.935642	0.857946	0.982117	0.932977	0.893184	0.971699	0.938897
	tennis	1.04637	0.956614	0.987351	0.875912	0.955304	0.863546	0.908141	0.998969	0.975717	0.947749	0.917661	0.978103	1.00939	0.908614	0.924355	0.900183	0.928835	1.05326	0.961673	0.995326	1.05531	1.02462	0.903175	1.02873	0.968955	1.10183	0.832367	0.616379	0.93555	1.05463	0.966586	0.996884	0.89675	0.942764	0.89109	0.903437	0.96147	0.928107	0.883733	0.827281	0.981687	1.02018	1.06232	0.866554	1.00905	1.00861	0.965256	0.900122
	soccer	1.0632	0.976096	0.902014	0.971779	0.921865	0.953634	0.990282	0.911456	1.04288	0.892233	0.778737	0.966782	1.01503	0.907893	1.01605	0.917632	0.921516	1.00392	0.80689	0.939636	0.927333	1.00692	0.908498	0.922235	0.9384	1.02097	0.834166	0.230425	0.906775	1.00745	1.07514	1.06902	0.969513	0.878771	0.803552	0.860129	0.967316	0.936425	0.977492	0.879577	0.896698	0.974169	1.03037	0.990243	0.955	0.773961	0.973163	0.961032
	volleyball	1.0175	0.983948	1.03371	1.03535	0.856668	0.918206	0.93142	0.961451	0.88691	0.761605	0.810464	0.842868	0.989421	0.895108	0.90091	0.820225	1.00646	1.05599	0.823709	0.974673	0.951668	0.89681	0.874173	0.786454	0.933614	1.03816	0.813527	0.433878	0.961422	0.991812	0.95188	1.06377	0.954841	0.991926	0.87129	0.803332	0.878992	0.89318	0.881606	0.850054	0.889263	0.98796	0.933468	0.885093	1.02816	0.851592	0.918498	0.812459
		1.02907	0.992152	0.947461	0.95607	0.900159	0.909177	0.949779	0.954667	0.997722	0.872911	0.82482	0.938457	0.994842	0.911123	0.981829	0.899495	0.956667	1.05136	0.869813	1.00747	0.995807	0.976581	0.894705	0.902392	0.979217	1.03509	0.803381	0.412019	0.923748	0.993358	0.998611	1.05053	0.966378	0.943287	0.866027	0.871141	0.963547	0.946733	0.916743	0.865713	0.921984	0.968981	0.964585	0.923414	0.97901	0.87154	0.950948	0.922524
30. A weather phenomenon	tornado	0.989006	0.852462	0.6596	0.833344	1.02596	0.95549	0.916192	0.789956	1.04051	0.861203	0.843082	0.881725	0.918087	0.735933	1.01065	0.832639	0.986213	0.847191	0.910475	0.978153	0.732615	0.895783	0.673891	0.909987	0.809891	0.792864	0.818989	0.876401	8.88178e-16	0.963166	0.726203	0.80704	0.89844	0.895556	0.878819	0.829279	0.902548	0.737027	1.02669	0.804767	0.779582	1.04806	1.06607	0.89362	0.73139	0.883959	1.00169	0.90852
	rain	0.998433	0.845448	0.967263	0.929367	0.860731	1.03466	0.906232	0.893994	0.935306	0.869156	0.814818	0.898193	1.02814	0.927061	0.949739	0.830958	1.02009	0.843722	0.817635	1.02931	0.75061	0.795849	0.835185	0.766038	0.818752	0.913739	0.886503	0.909486	0.80389	0.938427	0.876179	0.776706	0.772129	0.876419	0.899566	0.777532	0.792686	0.787125	0.944263	0.777753	0.893561	0.894952	1.01554	1.04815	0.964928	0.866212	1.00412	0.882898
	snow	0.897287	0.90153	0.979512	0.880766	0.924442	0.79066	0.92513	0.81256	1.00891	0.979083	0.885441	1.10116	0.932705	0.934009	1.03168	1.01211	0.955251	1.01778	1.01156	1.05868	0.9792	0.967001	0.965773	0.983092	0.949963	0.963203	0.773522	0.919168	0.942587	1.0288	0.834228	1.02594	1.01989	0.994161	0.949559	0.901461	0.855869	0.91788	0.897852	0.868826	0.922546	0.944773	0.983633	0.990377	1.00344	0.937877	0.894018	0.743483
	hurricane	0.934778	0.979501	0.901238	0.984447	0.864644	0.804866	0.936974	0.912716	0.962491	0.8939	1.08005	0.956608	0.904263	0.986686	0.996494	0.884834	0.997963	0.919767	0.939528	1.02033	0.932119	0.913134	0.890266	0.850623	1.03788	0.921171	0.857919	0.766831	0.870395	0.870085	0.858372	0.938541	0.931905	0.968395	1.03747	0.912063	0.983956	0.957901	0.886676	0.87828	0.894317	0.918918	0.983307	0.827888	0.816227	0.991502	0.85351	1.00389
	flood	1.04568	1.02125	0.970841	0.833608	0.818778	0.949124	1.0837	0.991424	1.02002	0.915536	0.992481	0.887612	0.952916	0.908934	0.926133	0.89415	0.933114	0.933685	0.942968	1.02698	0.846064	0.731004	0.869649	0.896384	0.960082	0.910639	0.861724	0.987434	0.910159	0.984599	0.875735	0.864388	0.886186	0.99471	0.943088	0.853974	0.842231	0.960217	0.972929	0.84592	0.998632	1.01987	0.994891	0.893534	0.952069	0.951454	1.02779	0.892018
		0.973037	0.920038	0.895691	0.892306	0.89891	0.90696	0.953645	0.88013	0.993449	0.903776	0.923174	0.94506	0.947222	0.898525	0.98294	0.890938	0.978527	0.912429	0.924434	1.02269	0.848121	0.860554	0.846953	0.881225	0.915313	0.900323	0.839731	0.891864	0.881758	0.957016	0.834144	0.882522	0.90171	0.945848	0.9417	0.854862	0.875458	0.87203	0.945682	0.835109	0.897728	0.965315	1.00869	0.930714	0.893611	0.926201	0.956226	0.886162
31. An article of clothing	shirt	1.00369	0.943334	0.841855	0.927638	0.91295	0.96687	0.880458	0.935649	0.805843	0.793874	0.863107	0.987047	0.993247	0.995001	0.962855	0.962012	0.956901	1.00009	0.780304	1.07342	0.875282	0.770036	0.908689	0.8471	0.855883	0.96818	0.946438	0.971122	0.963166	5.55112e-16	0.852193	0.97696	0.942077	0.843853	0.868088	0.808007	0.929973	0.955559	0.920102	1.05095	0.983067	0.92417	1.00525	1.02209	1.02857	0.925502	0.992472	0.842911
	sweater
	pants	0.914769	1.05453	0.931659	1.06657	0.973995	1.01285	0.916928	0.858031	0.988635	0.906138	0.811701	0.93654	1.07948	0.962439	0.953988	0.848727	0.958877	1.02163	0.821887	1.142	0.891419	0.865759	0.998996	0.878003	0.923628	1.10528	0.901194	0.950443	1.01843	0.801759	1.00844	1.02283	0.980617	0.941837	0.944449	0.81623	0.859616	0.938046	1.01873	1.01273	0.910274	0.957177	1.06977	1.00381	1.07314	0.966594	0.991791	0.865839
	jeans
	socks	0.905362	1.06967	0.95229	0.970504	0.826292	0.906694	0.927033	0.883087	0.859429	0.914373	0.761038	0.959473	0.88299	0.928926	0.703182	0.888259	0.92881	0.978628	0.779023	0.980544	0.741374	0.73411	0.854803	0.853388	0.837914	1.03986	0.897241	0.919482	0.962975	0.742945	0.969048	1.05424	0.756001	0.692871	0.891954	0.806876	0.753219	0.819386	0.797265	0.777605	0.934808	0.890151	1.01076	1.04483	1.06074	0.879087	0.918794	0.777256
		0.941274	1.02251	0.908601	0.988237	0.904412	0.962137	0.90814	0.892256	0.884636	0.871462	0.811949	0.96102	0.985238	0.962122	0.873342	0.899666	0.948196	1.00012	0.793738	1.06532	0.836025	0.789968	0.92083	0.859497	0.872475	1.03777	0.914958	0.947016	0.981523	0.772352	0.943228	1.01801	0.892898	0.826187	0.901497	0.810371	0.847603	0.90433	0.912034	0.947094	0.942716	0.923833	1.02859	1.02358	1.05415	0.923728	0.967686	0.828669
32. A part of a building	window	0.93179	0.864654	0.728054	0.834164	0.856982	0.851611	0.855126	0.920162	1.00665	0.88341	0.843324	0.924203	0.886283	0.870049	1.02644	0.910596	1.06383	0.870749	0.937372	1.05605	0.784721	0.902537	0.768475	0.878233	0.97107	0.716812	0.848478	0.985084	0.726203	0.852193	5.55112e-16	0.914023	0.927117	0.943646	0.933584	0.97621	0.861682	0.880193	0.912399	0.842504	0.932204	0.965456	1.02821	0.953648	0.934366	1.00591	0.94169	0.719309
	door	1.09935	0.884012	0.770509	0.78741	1.00029	0.979398	0.906217	0.837788	1.1096	0.938625	0.861027	0.893915	0.939824	1.05594	1.01198	0.868182	0.946913	0.999272	0.893309	1.06941	0.753633	1.01328	0.735358	0.92213	0.763099	0.872678	0.914049	0.934159	0.794368	0.921534	0.824389	0.920282	1.02175	0.885803	0.967854	0.862144	0.783635	0.721399	0.957868	0.804646	0.796623	0.885827	0.962385	1.03916	0.916705	0.877643	1.03511	0.734755
	floor	0.874987	0.90642	0.990463	0.997596	0.957266	1.0796	0.95083	0.792121	0.827054	0.924293	0.868006	0.924741	0.785204	0.994966	0.895089	0.887702	1.01922	0.788205	0.915541	1.04539	0.78584	0.916943	0.868161	0.911923	0.819728	0.849679	0.780475	0.990543	0.777876	0.818512	0.848118	0.973844	0.915622	0.787723	0.98436	0.870187	0.858518	0.856819	1.01256	0.896211	0.941145	0.93944	0.966143	0.923265	0.929696	0.93563	0.982919	0.919323
	wall	1.01891	0.993942	1.05714	0.975377	0.91669	0.879026	0.943585	1.01835	0.905289	0.888703	0.950374	0.96919	0.784215	0.914803	0.903457	0.824097	0.946612	0.997943	0.9831	0.998478	0.879215	1.00645	0.90301	1.02058	0.936712	0.986273	0.85554	0.946061	0.941909	1.04054	0.885589	0.975496	0.973556	0.829924	1.02288	0.997072	0.915908	0.871468	0.945353	0.888138	1.05345	1.03877	0.983039	0.916154	0.937494	1.04831	1.02882	0.793199
	roof	0.921644	0.841287	0.929024	0.833248	0.916421	0.959236	0.944904	0.877024	0.826674	0.961406	0.807284	0.881984	0.866805	1.02129	1.06067	0.908674	0.942953	0.977527	0.89163	0.97556	0.75588	0.868855	0.81166	0.953334	0.845148	0.860802	0.844376	0.95994	0.873597	0.857619	0.830333	0.959247	0.858158	0.833731	0.871183	0.924407	0.81993	0.826978	0.954029	0.783491	0.966442	0.964271	0.995408	0.842298	1.02122	0.8245	0.913015	0.80078
		0.969337	0.898063	0.895037	0.885559	0.929529	0.949773	0.920132	0.889088	0.935054	0.919287	0.866003	0.918807	0.852466	0.971409	0.979527	0.87985	0.983905	0.926739	0.92419	1.02898	0.791858	0.941613	0.817333	0.93724	0.867151	0.857249	0.848584	0.963157	0.822791	0.898079	0.847107	0.948578	0.93924	0.856165	0.955972	0.926004	0.847934	0.831371	0.956443	0.842998	0.937973	0.958754	0.987038	0.934904	0.947896	0.9384	0.980312	0.793473
33. A chemical element	oxygen	0.951537	0.841809	0.928254	1.09161	1.01458	1.11609	0.909257	1.00957	0.957701	0.946213	0.943241	1.05994	0.905381	0.821101	1.02179	0.929615	0.957843	0.934406	0.94297	1.07603	0.836464	1.03678	1.00045	0.932567	0.818504	0.788995	0.977697	1.05561	0.80704	0.97696	0.914023	5.55112e-16	1.10896	0.990048	1.03452	0.926256	0.836159	0.833117	0.886438	0.928634	0.862437	1.0015	0.967918	0.908271	0.716054	1.01983	0.997558	0.936655
	carbon	0.972182	0.95896	1.00991	0.927818	0.994781	0.914263	1.03277	0.897038	0.881866	0.922313	0.899112	1.0873	0.934666	1.02862	0.931382	0.91226	1.00086	1.05785	0.814051	0.972225	0.998959	0.917101	1.11238	0.999097	0.607457	1.0452	0.877203	0.994676	0.993747	0.921138	1.03054	0.792465	0.931249	0.862093	0.956238	0.974913	0.842412	0.821132	1.02285	0.852065	0.936748	0.989195	0.953155	0.987842	0.955066	1.10201	1.01165	0.827017
	helium	1.09728	0.921674	0.949244	0.872999	1.02676	0.95971	0.989662	0.965485	0.870978	0.971729	0.940216	0.905602	0.922262	0.880961	0.917425	0.919772	0.959746	0.872656	0.943561	1.12379	0.744974	0.932666	0.942017	0.841832	0.929064	0.889848	0.849952	0.93532	0.78596	1.00146	0.953212	0.856567	0.83974	0.860783	0.927789	0.778269	0.851441	0.859606	0.855734	0.815287	0.977134	0.874023	1.0135	0.957163	0.969142	0.873688	1.07588	0.839461
	nitrogen	0.911139	1.00326	1.05396	0.984859	0.853685	0.918843	0.942141	0.972584	0.806208	0.855309	0.892315	1.01631	0.967554	0.891203	0.937388	0.910643	1.04157	1.06988	0.858317	0.951953	0.822365	0.887069	1.02582	0.914538	0.703944	0.99843	0.868498	1.01844	0.896586	0.984339	0.917693	0.804218	0.93946	0.969317	0.88701	0.998701	0.795406	0.768039	0.925894	0.84211	0.886537	0.968466	0.957616	1.02912	0.886151	1.02774	1.0042	0.803048
	sodium	0.879874	0.887973	0.974362	0.969768	0.789326	0.896832	1.07392	0.909866	0.667114	0.8105	0.937479	0.983264	0.939358	1.06105	0.951533	0.925465	1.05044	0.969494	0.788742	0.940221	0.839355	1.07252	0.952018	0.67472	0.732309	1.02429	0.93846	1.03909	0.911942	0.811067	0.916669	0.826804	0.863894	0.833809	1.0369	0.875431	0.744968	0.80672	0.796027	0.913442	0.990351	0.930652	0.93754	0.985411	0.994661	0.962871	0.952253	0.780918
		0.962403	0.922736	0.983147	0.969411	0.935826	0.961148	0.989549	0.950909	0.836774	0.901213	0.922473	1.01048	0.933844	0.936586	0.951904	0.919551	1.00209	0.980856	0.869528	1.01284	0.848424	0.969227	1.00654	0.872551	0.758256	0.949353	0.902362	1.00863	0.879055	0.938992	0.946427	0.820014	0.936661	0.90321	0.968492	0.910714	0.814077	0.817723	0.897388	0.870307	0.930641	0.952767	0.965945	0.97356	0.904215	0.997228	1.00831	0.83742
34. A musical instrument	drum	1.02905	0.982915	0.965506	0.972249	0.919493	0.845891	0.945741	1.01923	0.852801	0.917907	0.797717	0.939993	0.90283	0.948575	0.881563	0.860305	0.914578	0.871704	0.935381	0.888506	0.795619	0.734718	0.865805	0.91436	0.884872	0.901211	0.974978	0.981724	0.89844	0.942077	0.927117	1.10896	1.11022e-15	0.727021	0.804021	0.836429	0.888724	0.840863	0.921649	0.693039	1.14107	0.934179	1.05991	0.818171	0.933418	0.971728	1.02886	0.972148
	guitar	0.943241	0.844914	0.853062	0.896353	0.882708	0.765783	0.898884	0.921088	0.858022	0.864792	0.809874	0.9423	0.892853	0.921872	0.912496	0.78723	0.881106	0.923847	0.764402	0.974067	0.677732	0.747047	1.00421	0.748649	0.916012	0.825884	0.838884	1.04244	0.851109	0.814582	0.81666	0.888043	0.664671	0.790763	0.833518	0.794331	0.847279	0.718563	0.835581	0.817834	0.992813	0.882627	0.946057	0.957146	0.970117	0.971106	1.00406	0.830698
	piano	0.946435	0.892962	0.790554	0.884929	0.916421	0.908141	0.945764	0.885172	0.862765	0.877371	0.791832	0.834993	0.915867	0.895305	0.893236	0.845769	0.86858	0.94406	0.830179	1.07182	0.769021	0.850007	0.852378	0.841015	0.906694	0.914527	0.823545	0.835361	0.712284	0.743258	0.923594	0.913725	0.688431	0.877353	0.755368	0.738554	0.864037	0.718299	0.880103	0.830325	0.991386	0.860127	0.926848	0.866735	0.917743	0.769512	0.909633	0.720904
	violin	0.898055	0.786004	0.720957	0.96532	0.963752	0.983862	0.851882	0.870527	1.0254	0.90322	0.798923	0.986128	0.91298	0.814366	1.0002	0.875932	0.92069	0.932498	0.954051	1.04592	0.729489	0.894925	0.817539	0.879135	0.871582	0.743346	0.864291	0.7909	0.730571	0.88372	0.730415	0.801952	0.891334	0.983303	0.85371	0.821194	1.02424	0.797232	0.956844	0.768838	0.841377	0.967457	0.951079	0.85873	0.849765	0.857956	0.873227	0.859741
	bass	0.966551	0.943715	0.958523	0.994319	0.831631	0.751224	1.01843	0.852444	0.947804	0.768098	0.778774	1.00039	0.931042	0.89743	0.771847	0.884029	0.844488	0.904174	0.861495	0.952486	0.796364	0.800917	0.866097	0.940773	0.914515	0.925089	0.767416	0.828621	0.914855	0.953821	0.913538	0.931625	0.685325	0.872197	0.907137	0.791445	0.8781	0.797141	0.915521	0.724899	0.911532	0.862654	1.02314	0.890104	0.980136	0.995092	0.989313	0.851297
		0.956665	0.890102	0.85772	0.942634	0.902801	0.85098	0.93214	0.909693	0.909359	0.866278	0.795424	0.940761	0.911114	0.89551	0.891868	0.850653	0.885888	0.915257	0.869102	0.98656	0.753645	0.805523	0.881205	0.864786	0.898735	0.862011	0.853823	0.89581	0.821452	0.867491	0.862265	0.928861	0.73244	0.850127	0.830751	0.796391	0.900476	0.77442	0.90194	0.766987	0.975635	0.901409	0.981407	0.878177	0.930236	0.913079	0.961018	0.846958
35. A kind of money	dollar	1.04886	0.920135	0.79917	0.857085	0.9724	0.926646	0.994065	1.02822	0.941663	0.885356	0.828763	0.968013	0.797274	0.997747	0.909235	0.811639	0.988207	0.857767	0.890703	0.988757	0.826118	0.870006	0.862072	0.851378	0.717452	1.05315	0.852005	0.9213	0.895556	0.843853	0.943646	0.990048	0.727021	7.77156e-16	0.948643	0.741768	0.897294	0.781823	1.02036	0.877882	1.05413	0.92086	0.910048	1.03333	0.939939	0.968074	0.986143	0.885193
	penny	0.879599	0.990602	0.902978	0.912011	0.953701	0.899186	0.940015	1.04653	0.870283	1.0193	0.954784	1.07369	0.933784	0.93463	1.01918	1.01097	1.06392	1.05632	0.936271	0.830926	0.943355	1.06793	1.03897	0.935429	0.930415	1.01994	0.929765	1.02384	0.965974	0.920254	1.04188	0.957637	0.834301	0.853478	0.900287	0.998237	0.915475	0.954889	0.778827	0.985733	1.05332	1.0874	1.01237	0.96551	0.848947	0.992044	0.982183	0.976519
	dime
	nickel
	quarter	1.00885	0.973985	0.94613	0.875676	0.843311	0.881765	1.0485	0.976966	1.06817	1.07127	0.915454	1.03277	0.97834	1.00677	0.943649	1.00345	1.05656	1.08036	0.861051	1.0928	1.00352	0.890442	1.01836	1.02081	0.89619	1.03656	1.00006	0.97609	0.936875	1.00888	0.923084	1.01542	0.931073	0.877711	0.959011	0.941825	1.00344	0.857183	0.991475	0.903619	1.00129	0.946426	1.12462	0.840972	0.944885	0.990002	1.00695	0.933921
		0.979102	0.961574	0.882759	0.88159	0.923137	0.902532	0.994194	1.01724	0.960039	0.991975	0.899667	1.02482	0.903133	0.979715	0.957356	0.942021	1.03623	0.99815	0.896008	0.970829	0.924331	0.942792	0.973134	0.935873	0.848019	1.03655	0.927275	0.973744	0.932802	0.924329	0.969537	0.987702	0.830798	0.865594	0.935981	0.893943	0.938735	0.864632	0.93022	0.922411	1.03625	0.984896	1.01568	0.946602	0.911257	0.983373	0.991758	0.931878
36. A type of music	rap	0.969459	0.864124	0.909154	0.945576	0.973861	0.969166	0.948998	0.908273	0.990027	1.02441	0.855041	1.00693	1.11669	0.972397	1.01745	0.885363	1.02885	0.958513	0.770021	0.942622	0.86071	0.904987	0.981637	1.07021	0.875138	0.927535	1.01405	0.857533	0.878819	0.868088	0.933584	1.03452	0.804021	0.948643	3.33067e-16	0.903546	0.881708	0.922531	1.02993	0.87465	0.92462	1.07119	0.932939	1.02631	1.05031	0.889121	0.930476	0.917952
	jazz	0.929932	0.950925	0.924916	0.907712	0.890453	0.896088	1.02022	0.89027	0.926167	0.96982	0.928731	0.934517	0.979598	0.960255	0.973739	1.03239	0.987686	1.04256	0.963138	1.02199	1.00964	1.05874	0.881904	0.748463	1.09043	0.997489	0.772847	0.653459	0.897838	0.979665	0.922134	1.03198	0.953383	0.908344	0.914584	0.865114	0.922833	1.00705	0.997739	0.94559	1.08472	0.87517	0.951379	0.94979	0.990192	0.905743	0.903148	0.932995
	blues	0.926029	0.93763	0.88357	1.01521	0.928029	0.916855	0.999357	0.755607	0.911617	0.932533	0.850879	0.946956	0.933353	0.863073	1.00787	0.923606	0.931197	0.990707	0.770028	1.11816	0.79775	0.878537	0.90962	0.90957	0.980761	0.913241	0.907194	0.846331	0.869855	0.86729	0.929664	0.879767	0.846554	1.00782	0.739942	0.867849	0.863346	0.837367	0.94622	0.820499	0.891124	0.947829	0.965445	0.951484	0.926478	0.924154	0.9476	0.785198
	rock	1.05213	0.954656	0.819651	0.948091	0.930656	1.03786	0.882002	0.963817	0.947098	0.886179	0.840458	0.856694	0.930845	0.895073	1.00727	0.818012	0.974641	1.03726	0.904799	1.05761	0.864862	0.837097	0.886569	0.868603	0.981188	0.925086	0.932755	0.857193	0.776948	0.867764	0.891923	0.960631	0.869789	0.875032	0.867416	0.831694	0.949691	0.898029	0.971391	0.909469	0.941395	0.850864	0.885937	0.878068	0.941256	0.851573	1.00196	0.927625
	pop	1.05141	0.898699	0.99049	0.871248	0.929412	0.908283	0.87892	0.910749	0.92701	0.885002	0.976173	0.982352	0.953317	1.00643	0.976053	0.914166	1.13067	1.03648	0.903809	0.975758	0.895985	0.784067	0.921985	0.905648	0.942018	1.01267	0.929737	0.956566	0.95414	0.860737	0.870361	1.01589	0.944687	0.917043	0.977984	0.856261	1.04526	0.938628	0.943096	0.997014	0.977244	0.934303	0.965537	0.957776	1.01278	0.864437	1.038	0.943915
		0.985792	0.921207	0.905556	0.937568	0.930482	0.94565	0.945898	0.885743	0.940384	0.939588	0.890256	0.945489	0.982761	0.939445	0.996475	0.914707	1.01061	1.0131	0.862359	1.02323	0.885789	0.892685	0.916343	0.900499	0.973906	0.955204	0.911317	0.834216	0.87552	0.888709	0.909533	0.984559	0.883687	0.931377	0.874981	0.864893	0.932568	0.920721	0.977675	0.909444	0.96382	0.935871	0.940247	0.952685	0.984204	0.887006	0.964238	0.901537
37. A bird	eagle	1.04376	0.872355	0.91948	0.929871	1.00175	0.998632	0.951918	0.865637	0.949101	0.851272	0.86294	0.780925	0.918706	0.889788	0.847937	0.833111	0.961738	0.930533	0.804881	0.939225	0.769319	0.769501	0.781024	0.830843	0.759452	0.921182	0.852909	0.8776	0.829279	0.808007	0.97621	0.926256	0.836429	0.741768	0.903546	1.11022e-15	0.938857	0.870096	1.01321	0.930632	0.883536	1.01068	0.983582	0.965901	0.982517	0.866347	1.00531	0.949066
	robin	0.854732	0.966028	0.84916	0.909521	0.873894	0.945604	1.02673	0.847731	0.82397	0.80392	0.882516	0.969302	0.853109	1.0009	0.967007	0.841534	0.881208	0.897106	0.78916	0.977074	0.7903	0.918152	0.860665	0.885336	0.865131	0.850665	0.908111	0.958489	0.81479	0.813301	0.834125	0.991359	0.910695	0.971376	0.913697	0.845396	0.950338	0.928088	0.967603	0.83106	0.79472	0.945861	0.917643	0.971396	0.917509	0.88444	1.06274	0.818064
	hawk	1.06481	0.949755	0.894926	0.910285	0.924353	0.914809	0.887797	0.972217	1.02129	0.933024	0.855557	0.857955	0.821889	0.943083	0.859703	0.74323	0.928252	0.911822	0.913199	0.906748	0.822549	0.852462	0.931256	0.968905	0.844824	0.997259	0.924414	1.00078	0.918232	1.00511	1.00913	1.03508	0.793174	0.824856	0.890024	0.756627	0.916541	0.862457	0.928316	0.786053	1.05041	0.954432	0.974618	0.916373	1.07477	0.891884	1.06443	0.965516
	parrot	0.92474	1.08533	0.903489	1.03127	0.882451	0.786834	0.933194	0.906139	0.818829	0.976281	0.880983	0.925002	0.847889	0.899896	0.998097	0.819776	0.857413	0.895653	0.913795	1.14784	0.666299	0.850921	0.953937	0.88292	0.914548	0.806561	1.02909	0.989581	0.906315	0.931311	0.832576	0.98173	0.906064	0.998173	0.832455	0.912658	0.917328	0.954881	0.783717	0.70989	0.890624	0.892715	0.946018	0.946891	0.907547	1.00207	0.956732	0.86917
	owl	0.832455	0.992035	0.891598	0.912535	0.934208	0.977851	0.860284	0.820378	0.900408	0.964786	0.825653	0.916364	0.883995	0.978984	0.96153	1.01184	1.02664	0.992717	0.893098	1.07628	0.826072	0.845523	0.884739	0.888746	0.921068	0.876736	0.879851	0.931307	0.892912	0.794258	0.81924	0.986778	0.888389	0.968337	0.774598	0.871579	0.822775	0.898937	0.91016	0.882502	0.88803	0.992759	0.92417	1.08516	0.96746	0.911037	0.846894	0.773659
		0.919184	0.9731	0.891731	0.938697	0.923331	0.924746	0.931985	0.88242	0.902719	0.905857	0.86153	0.889909	0.865117	0.942529	0.926855	0.849899	0.93105	0.925566	0.862827	1.00943	0.774908	0.847312	0.882324	0.89135	0.861005	0.890481	0.918875	0.951551	0.872305	0.870398	0.894256	0.984241	0.86695	0.900902	0.862864	0.846565	0.909168	0.902892	0.920601	0.828027	0.901465	0.959289	0.949206	0.977144	0.96996	0.911155	0.987221	0.875095
38. A non-alcoholic beverage	water	0.988036	0.942865	0.901389	1.04908	0.825555	0.97343	0.986283	0.820236	0.865608	1.04546	0.913291	0.851898	1.00934	1.0765	0.934476	0.894649	0.943456	0.964643	0.704742	0.976892	0.835276	0.924332	0.862143	0.722436	0.811783	1.00282	0.727625	1.00956	0.902548	0.929973	0.861682	0.836159	0.888724	0.897294	0.881708	0.938857	6.66134e-16	0.787844	0.964681	0.838912	0.944273	0.914852	1.03891	1.10127	0.960885	0.953373	0.979341	0.759664
	coke	1.02258	1.01993	0.946016	0.994187	0.800553	0.818623	0.97675	0.756425	0.774954	0.962832	0.784282	0.94955	0.972952	0.979748	0.965628	0.924364	0.944339	1.02811	0.748307	0.961631	0.746744	0.800264	0.892232	0.745773	0.781003	0.893934	0.852166	1.05821	0.934905	0.836919	0.879227	0.926585	0.753476	0.994805	0.849133	0.909948	0.674183	0.738729	0.768855	0.688054	0.922287	0.893404	1.01342	1.04952	0.913489	1.00105	1.04475	0.813641
	milk	1.0317	0.942957	0.823644	0.916131	0.83851	0.986951	0.9373	0.905481	0.861963	0.998611	0.762481	0.965945	0.88572	0.895824	0.918637	0.745462	0.917319	0.98369	0.700114	1.05133	0.885992	0.952693	0.857049	0.968077	0.749776	1.11575	0.894632	0.982856	0.914648	0.849343	0.876683	0.810122	0.941898	0.878275	1.03694	0.88244	0.655661	0.925553	0.96393	0.788916	0.953954	0.950372	0.926523	1.04561	0.92513	1.00837	0.97051	0.630047
	soda	1.04277	0.87344	0.743434	0.837622	0.861453	0.821819	0.970808	0.896982	0.811053	0.834842	0.826021	0.897989	0.934952	0.953684	0.947653	0.853806	0.921524	0.922367	0.756969	1.02482	0.712591	0.770263	0.884279	0.811999	0.695493	0.918448	0.895209	0.943167	0.823414	0.671393	0.780091	0.78177	0.831405	0.860291	0.913921	0.72112	0.684983	0.755844	0.843157	0.748989	0.959422	0.900709	1.02845	1.02339	0.857846	0.864867	1.03896	0.681037
	juice	0.921343	1.00405	0.983086	0.994571	0.776763	0.966952	0.950666	0.896974	0.853231	0.867515	0.853223	1.01246	0.921405	0.947248	1.01945	0.849589	0.904543	0.994287	0.699265	1.00946	0.80542	0.989209	0.867271	0.814037	0.81358	0.954492	0.894678	0.976579	0.930101	0.902765	0.887013	0.865463	0.807575	0.891709	0.836986	0.871415	0.577301	0.807757	0.923463	0.843539	1.00939	0.876839	0.979779	1.04483	0.909647	0.997729	0.930005	0.798507
		1.00129	0.956647	0.879514	0.958317	0.820567	0.913555	0.964361	0.85522	0.833362	0.941851	0.82786	0.935568	0.944873	0.970601	0.95717	0.853574	0.926236	0.978619	0.721879	1.00483	0.797205	0.887352	0.872595	0.812464	0.770327	0.977088	0.852862	0.994074	0.901123	0.838079	0.856939	0.84402	0.844615	0.904475	0.903738	0.864756	0.648032	0.803145	0.892817	0.781682	0.957864	0.907235	0.997417	1.05292	0.9134	0.965078	0.992712	0.736579
39. A transportation vehicle	car	1.06123	0.849262	0.817147	0.806011	0.916592	0.988855	0.873911	0.882645	1.04048	0.821652	0.736074	0.861177	0.911184	0.917111	0.934992	0.701801	0.989684	1.00238	0.785829	1.04215	0.661686	0.849312	0.741179	0.865828	0.70953	0.830886	0.871627	0.993716	0.737027	0.955559	0.880193	0.833117	0.840863	0.781823	0.922531	0.870096	0.787844	1.22125e-15	0.999422	0.688187	0.9502	0.992989	0.969924	0.950235	0.903056	0.99575	0.957193	0.82538
	truck	0.958424	0.846185	0.872435	0.907246	0.882175	0.985251	0.943562	0.851197	1.03257	0.936015	0.772618	0.879083	0.991693	0.915496	0.999132	0.795655	1.00426	0.949407	0.888336	0.986343	0.783618	0.85973	0.806367	0.933351	0.770634	0.938713	0.862472	0.840304	0.817915	0.951193	0.783342	0.868841	0.955317	0.798988	0.962306	0.815011	0.764923	0.746151	1.10338	0.793816	0.919914	0.954786	0.879102	1.00344	0.994318	0.897417	0.896495	0.738139
	suv	1.03441	0.897228	0.705309	0.935287	0.844322	0.963811	0.897151	0.731582	0.971226	0.893718	0.620324	0.774874	0.948282	0.84042	1.03665	0.596879	0.895436	0.947588	0.698605	0.99496	0.675919	0.89286	0.701132	0.793172	0.727456	0.860244	0.836681	0.876568	0.703606	0.922567	0.742328	0.890191	0.91428	0.807965	0.886411	0.636058	0.715777	0.686373	1.00579	0.690478	0.919323	0.907762	1.00773	1.00271	0.967594	0.875404	1.0418	0.718932
	taxi	0.807263	0.977213	0.894099	0.902788	0.913547	0.9789	0.899242	0.835662	1.03809	0.956916	0.798833	1.00846	0.997255	0.997679	1.0807	0.911576	0.962751	0.981359	0.856823	1.08864	0.916912	1.03371	0.902049	0.947368	0.882706	0.971441	0.970341	0.96768	0.911603	0.964356	1.0023	0.936995	0.951722	0.879193	0.971766	0.932555	0.959357	0.785404	1.0066	0.922493	0.854032	0.968742	1.01436	0.971486	0.931454	1.05068	0.902337	0.904493
	bus	0.907406	0.802338	0.854456	0.906395	0.912315	1.05322	0.898146	0.829921	1.04133	0.899808	0.673978	0.842619	1.0121	0.927068	1.00804	0.875934	0.957609	1.02865	0.838986	1.05912	0.89025	0.851788	0.740945	0.910347	0.776155	0.878486	0.955376	1.005	0.776629	0.919812	0.964039	0.969354	0.913586	1.00539	0.870681	0.877237	0.933249	0.677236	1.02249	0.92441	0.798316	1.0369	0.975099	0.940395	0.920882	0.972041	0.917654	0.833955
		0.953747	0.874445	0.828689	0.891545	0.89379	0.994007	0.902402	0.826201	1.02474	0.901622	0.720365	0.873243	0.972103	0.919555	1.0119	0.776369	0.961948	0.981876	0.813716	1.03424	0.785677	0.897479	0.778334	0.890013	0.773296	0.895954	0.899299	0.936653	0.789356	0.942697	0.874441	0.899699	0.915154	0.854673	0.922739	0.826192	0.83223	0.723791	1.02754	0.803877	0.888357	0.972236	0.969241	0.973654	0.943461	0.958259	0.943095	0.80418
40. A science	biology	1.01972	0.977745	0.988845	1.01687	0.833352	0.672606	0.834068	1.05308	0.843178	0.997509	0.875534	0.936594	0.790948	0.948226	0.917718	0.967122	1.00908	1.0167	0.942458	1.06277	0.852576	0.94137	1.01721	0.894343	0.928653	0.949192	0.866159	0.949593	1.02669	0.920102	0.912399	0.886438	0.921649	1.02036	1.02993	1.01321	0.964681	0.999422	2.22045e-16	0.846018	1.16167	0.7556	0.907967	0.959418	0.866309	0.915598	1.10958	0.985102
	chemistry	0.989672	1.01035	0.915409	1.05949	0.818283	0.766398	0.905684	0.862217	0.826462	0.79798	0.866708	0.873839	0.697466	1.05741	0.916101	0.920049	0.958975	1.12361	0.930911	0.968652	0.858182	0.879385	0.952242	0.801707	0.858878	0.924484	0.900768	0.992366	1.00941	0.885121	0.840009	0.91491	0.788817	0.935854	1.05356	0.929713	0.804355	0.834003	0.573439	0.81933	1.01661	0.811134	0.936331	0.994635	0.919569	0.875093	0.995661	0.860367
	psychology	0.960431	1.02689	1.11649	0.968056	0.919905	0.830077	1.01606	0.901958	0.953391	1.0988	0.858443	1.04235	0.977751	1.02374	0.919141	0.827383	0.952853	1.07079	0.905779	1.03082	0.87562	1.00143	1.06464	0.973365	1.04646	1.06521	0.941391	0.97185	0.967461	1.07195	1.02773	0.982203	0.915063	0.98637	0.900465	1.02688	0.871862	0.942702	0.744516	0.807674	0.998057	0.869234	0.957618	1.05984	0.925289	1.05046	0.997811	0.916626
	sociology
	anthropology
		0.989941	1.005	1.00691	1.01481	0.85718	0.75636	0.918605	0.939086	0.874344	0.964763	0.866895	0.950929	0.822055	1.00979	0.917654	0.904852	0.973635	1.07037	0.926383	1.02075	0.862126	0.940727	1.01136	0.889805	0.944663	0.979628	0.902773	0.97127	1.00119	0.959059	0.926712	0.92785	0.875177	0.980861	0.994651	0.989935	0.880299	0.925375	0.658977	0.824341	1.05878	0.811989	0.933972	1.00463	0.903722	0.94705	1.03435	0.920699
41. A toy	doll	1.05248	1.0374	0.903486	0.980977	0.855842	0.794531	1.05354	0.827682	0.993811	0.940868	0.789164	0.829841	0.869954	0.866615	1.01582	0.690578	0.89214	0.707877	0.778894	1.02984	0.591472	0.787568	0.860567	0.984114	0.778611	0.940853	0.897372	0.873969	0.804767	1.05095	0.842504	0.928634	0.693039	0.877882	0.87465	0.930632	0.838912	0.688187	0.846018	4.44089e-16	0.883265	0.874644	0.978484	0.827637	0.899374	1.03374	1.00315	0.734272
	lego	0.977594	0.967924	0.915009	0.930444	1.02139	0.902244	0.935666	0.824009	0.823497	0.937605	0.917412	0.968168	0.909857	0.897747	0.856812	0.997589	0.883297	0.898964	0.903048	0.890594	0.945194	0.816604	0.907415	0.957424	0.896463	0.830002	0.868114	1.07035	0.826941	0.914671	0.898945	0.960856	0.865297	1.00793	0.945574	0.937638	0.909197	0.923407	0.933565	0.92703	0.989527	0.973057	0.980288	1.06092	0.949781	0.999652	1.03253	0.891101
	nintendo	0.92039	0.892455	0.993333	0.939222	0.927626	0.967764	0.964527	0.807795	0.805979	0.96079	0.97524	0.984632	0.868998	0.88858	0.828317	0.929895	0.953825	0.864559	1.02739	0.879917	0.826243	0.790881	0.874696	0.941724	0.933378	0.935076	0.858206	0.944098	0.983945	0.947982	0.892744	0.957994	0.954239	1.01584	1.04399	0.861431	0.912231	0.97147	0.928026	0.91903	0.91648	0.953727	0.965351	1.00005	0.966561	0.773249	0.933672	0.800001
	barbie
	puzzle	1.04128	1.03404	0.937804	0.853548	0.873865	0.846783	0.969974	0.985577	1.0069	0.873241	0.928838	0.996487	1.03489	0.857978	1.06094	0.996816	1.09385	1.03246	0.900446	1.15271	0.952248	0.981631	0.981772	0.942029	1.08609	0.981905	0.896158	0.918177	0.931476	0.909712	0.941846	0.895796	0.941038	0.871879	0.842929	0.874482	0.982752	1.03622	0.760761	0.901407	0.950123	0.914587	1.01219	1.03353	0.927968	0.906511	0.981851	0.935134
		0.997937	0.982954	0.937408	0.926047	0.91968	0.87783	0.980928	0.861266	0.907548	0.928126	0.902663	0.944782	0.920924	0.87773	0.940473	0.90372	0.955778	0.875964	0.902445	0.988267	0.828789	0.844171	0.906112	0.956323	0.923636	0.921959	0.879963	0.951648	0.886782	0.955829	0.89401	0.93582	0.863403	0.943383	0.926785	0.901046	0.910773	0.904821	0.867093	0.915822	0.934849	0.929004	0.984078	0.980535	0.935921	0.928288	0.987802	0.840127
42. A type of dance	ballet
	jazz	0.929932	0.950925	0.924916	0.907712	0.890453	0.896088	1.02022	0.89027	0.926167	0.96982	0.928731	0.934517	0.979598	0.960255	0.973739	1.03239	0.987686	1.04256	0.963138	1.02199	1.00964	1.05874	0.881904	0.748463	1.09043	0.997489	0.772847	0.653459	0.897838	0.979665	0.922134	1.03198	0.953383	0.908344	0.914584	0.865114	0.922833	1.00705	0.997739	0.94559	1.08472	0.87517	0.951379	0.94979	0.990192	0.905743	0.903148	0.932995
	tap	0.979368	1.02589	1.00714	1.01528	0.907633	0.943355	0.936797	0.974044	0.99073	0.7877	0.982177	0.962709	0.949191	0.783273	0.759066	0.886077	1.0546	0.919374	0.891742	0.97275	0.77181	0.877296	0.908421	0.790278	0.882887	1.04805	0.775188	0.840003	0.924491	0.885055	0.941156	0.838256	0.990692	0.856183	0.990315	0.727393	0.768354	0.895274	0.866919	0.930564	0.853588	0.984746	0.974054	1.06891	0.980385	0.661893	0.921709	0.80757
	break	1.05281	0.971977	0.972447	0.809976	0.944579	0.854452	0.936853	0.99282	1.0053	0.909166	0.91493	0.972372	0.953184	0.930961	1.06371	0.963396	0.97118	0.922475	0.977594	0.919552	0.88436	0.892101	0.933813	0.946808	0.931933	0.949553	0.965493	0.857426	0.868899	0.905941	0.909627	0.996906	1.07606	1.08671	0.991127	0.884273	0.973466	0.879226	0.92843	0.977377	0.986666	1.027	1.00151	0.934758	0.915777	0.949765	0.956223	0.857223
	line	0.919906	0.711409	0.872306	0.601455	1.02772	1.02008	0.917236	0.990785	1.0453	0.90771	0.876204	0.926102	0.987321	0.9212	0.975042	0.911399	0.983938	0.967266	1.01538	0.987706	0.93168	0.978521	0.815053	1.01283	0.918498	0.794202	0.857123	1.00467	0.841571	0.975756	0.765848	0.929535	0.964835	0.897314	0.911354	0.890652	0.948547	0.912463	1.03746	0.86374	0.905643	0.93037	0.990916	0.997882	0.907539	0.969736	0.744414	0.809739
		0.970503	0.91505	0.944201	0.833606	0.942595	0.928493	0.952776	0.96198	0.991875	0.893599	0.925511	0.948925	0.967324	0.898922	0.94289	0.948315	0.99935	0.962918	0.961964	0.975499	0.899372	0.951663	0.884798	0.874596	0.955936	0.947323	0.842663	0.83889	0.8832	0.936604	0.884691	0.949169	0.996244	0.937137	0.951845	0.841858	0.9033	0.923503	0.957637	0.929318	0.957653	0.954321	0.979464	0.987834	0.948473	0.871784	0.881373	0.851882
43. A vegetable	carrot
	lettuce
	onions	0.880725	0.975807	0.846982	0.908407	0.964411	0.955333	0.974135	0.858456	0.88788	0.949955	0.771636	0.90378	0.945933	0.982946	1.04579	0.793399	0.943324	0.998873	0.698122	1.04444	0.716984	0.872394	0.846761	0.856543	0.838309	0.885664	0.886481	1.07748	0.913531	0.965294	0.867689	0.802289	0.883261	0.836937	0.95827	0.878969	0.634659	0.773616	0.913171	0.742108	0.942409	0.977217	0.963502	1.05838	0.936003	0.956004	0.948679	0.725856
	broccoli
	tomato
		0.880725	0.975807	0.846982	0.908407	0.964411	0.955333	0.974135	0.858456	0.88788	0.949955	0.771636	0.90378	0.945933	0.982946	1.04579	0.793399	0.943324	0.998873	0.698122	1.04444	0.716984	0.872394	0.846761	0.856543	0.838309	0.885664	0.886481	1.07748	0.913531	0.965294	0.867689	0.802289	0.883261	0.836937	0.95827	0.878969	0.634659	0.773616	0.913171	0.742108	0.942409	0.977217	0.963502	1.05838	0.936003	0.956004	0.948679	0.725856
44. A type of footwear	sandals
	clogs
	heels	1.04218	0.964028	0.959663	0.86779	0.890864	0.875796	0.939315	0.989668	0.992988	0.874555	0.847224	0.945168	0.879927	0.890559	0.850491	0.759031	0.861138	0.896486	0.97148	1.04917	0.900276	0.80139	0.975404	1.02053	0.888243	0.950335	0.738978	0.942342	0.86585	0.916476	0.843513	0.891668	0.943957	0.896239	0.867775	0.827601	0.900187	0.917241	0.880507	0.767665	0.868059	0.850541	0.81825	0.955716	1.0814	0.895921	0.992913	0.854668
	shoes	0.966605	0.945527	0.852607	0.912122	0.948102	0.990024	0.946301	0.760673	0.71504	0.772825	0.858279	0.904327	0.959829	0.940858	0.887198	0.992123	0.972953	0.874401	0.880442	0.862693	0.8236	0.881946	0.844307	0.931813	0.775529	0.98796	0.862266	1.02488	0.796624	0.754268	0.871392	0.970431	0.971237	0.848182	1.01515	0.733011	0.802876	0.752487	1.08432	0.881332	0.873364	1.03196	1.06463	1.0824	0.980558	1.02537	0.970052	0.882338
	boots	0.960066	0.872366	1.1014	0.96352	0.861974	0.89736	1.09738	0.841001	0.752399	0.985259	0.893841	1.01193	0.896886	1.0323	0.743318	0.811049	0.973678	0.921451	0.865375	1.01338	0.736378	0.795184	0.953232	0.951386	0.827803	0.935687	0.883923	1.05649	0.964796	0.844082	0.885749	0.913345	0.804728	0.921121	0.952691	0.960168	0.833665	0.830209	0.867942	0.727202	0.91212	0.933443	0.964618	0.934526	1.03921	0.944036	1.00768	0.776025
		0.989619	0.927307	0.971224	0.914477	0.900313	0.92106	0.994332	0.863781	0.820142	0.877546	0.866448	0.95381	0.912214	0.954571	0.827002	0.854068	0.935923	0.897446	0.905766	0.975081	0.820084	0.826173	0.924315	0.96791	0.830525	0.957994	0.828389	1.0079	0.875757	0.838276	0.866885	0.925148	0.906641	0.888514	0.945206	0.84026	0.845576	0.833312	0.944257	0.792066	0.884514	0.938647	0.949167	0.990879	1.03372	0.955108	0.990214	0.837677
45. An insect	fly	0.879893	0.902442	0.99178	0.999703	1.02	0.950689	0.897359	0.80702	0.982716	0.698699	0.999632	1.01759	1.04696	0.916727	1.02635	0.902168	0.970551	0.969188	0.853698	1.02763	0.873726	0.961682	1.01241	0.992016	0.876868	1.05109	0.876755	0.933532	0.779582	0.983067	0.932204	0.862437	1.14107	1.05413	0.92462	0.883536	0.944273	0.9502	1.16167	0.883265	3.33067e-16	1.05305	1.03816	0.967849	0.961656	1.03494	0.84032	0.824948
	spider	0.966583	0.946872	0.929185	0.941259	0.882023	0.902312	0.938804	0.947131	0.892906	0.935288	1.03003	0.938022	0.870243	0.861299	0.963292	0.970531	0.980582	1.02793	0.923252	1.03942	0.796706	0.940693	0.930322	0.922082	1.01501	0.854729	1.00662	1.10991	0.94834	0.985729	0.992048	0.79539	0.733931	0.954418	0.927709	0.834352	0.908771	0.871891	0.736375	0.922921	1.0201	0.907029	1.00435	1.05684	0.843688	0.902403	1.04185	0.951799
	bee	0.949645	0.992637	0.884349	0.908957	0.985534	0.969701	1.02369	0.910148	0.839533	0.967215	0.85462	0.838671	0.994043	1.01579	0.851534	0.938371	0.926835	1.0307	0.863953	0.97432	0.855233	0.846559	0.816149	0.810245	0.766972	0.973101	0.878817	1.03188	0.900236	0.756645	0.978689	1.05395	0.798102	0.796799	0.790689	0.760733	0.763892	0.781141	1.01062	0.995276	0.992007	0.963083	0.943716	0.999119	1.01067	0.878298	0.928475	0.854015
	bug	0.971861	0.87404	0.97289	0.9762	0.932474	0.931317	1.02874	0.904585	0.834148	0.959873	0.880487	1.00389	0.968309	0.948921	0.911024	0.932149	0.990768	0.871669	0.781633	0.882935	0.834078	0.951107	0.81214	0.961899	0.968897	1.01435	0.998649	1.02178	0.965094	0.869429	0.905526	0.829772	0.972655	0.907246	0.862815	0.943708	0.805585	0.94032	0.914102	0.817741	0.97601	1.13411	0.952852	0.941955	0.898897	0.997989	0.986083	0.839692
	worm	0.995756	1.15761	1.00004	0.967752	0.81638	0.769796	0.943329	0.981531	0.755503	0.860302	1.00394	1.00245	0.86319	0.930643	1.00356	0.916533	0.958568	1.011	0.873082	0.994602	0.81016	0.978694	1.01912	0.944202	0.903947	0.998707	0.855097	0.970709	0.94591	0.987999	1.09164	0.913781	0.938491	0.977584	1.00174	0.931449	0.883535	0.885183	0.684873	0.82172	1.01991	0.797822	1.01544	1.02024	0.781158	0.793549	0.944714	0.92235
		0.952747	0.97472	0.95565	0.958774	0.927283	0.904763	0.966384	0.910083	0.860961	0.884275	0.953742	0.960125	0.94855	0.934675	0.951151	0.93195	0.965461	0.982097	0.859124	0.983783	0.833981	0.935747	0.918027	0.926089	0.906339	0.978396	0.923188	1.01356	0.907833	0.916574	0.980022	0.891066	0.916849	0.938035	0.901515	0.870756	0.861211	0.885747	0.901528	0.888185	1.00201	0.97102	0.990902	0.997201	0.899213	0.921437	0.948289	0.878561
46. A female first name	sarah	1.07815	1.10146	0.895314	1.0429	0.769161	0.792868	0.901497	0.920242	0.880207	1.09119	0.910008	0.888107	0.888582	1.03231	0.972368	0.980717	0.85801	0.947873	1.02519	1.12285	0.899936	0.988547	0.979966	0.867219	0.986932	0.857869	0.933311	0.926955	1.04806	0.92417	0.965456	1.0015	0.934179	0.92086	1.07119	1.01068	0.914852	0.992989	0.7556	0.874644	1.05305	8.88178e-16	0.92973	1.08909	0.915979	0.951508	1.01172	1.02206
	mary	0.910848	0.907953	0.949039	0.912996	0.982095	1.00282	0.891368	0.949597	1.02372	0.823715	0.860086	0.93033	0.897683	0.805421	0.976168	0.846393	0.851018	0.896665	0.89029	1.07269	0.867399	0.89525	0.900801	1.02318	0.991389	0.849082	0.879604	0.956259	0.857268	0.970195	0.84447	0.874263	0.872063	0.904821	1.02457	0.888203	0.956488	0.791252	0.994168	0.867499	0.992372	0.887356	0.8303	0.873634	0.905124	1.03611	0.98233	0.872858
	jessica	0.760226	0.865111	0.908316	0.950039	0.986336	1.03689	0.756408	0.828899	0.797634	0.880274	0.849275	0.898538	0.890521	0.915187	0.905194	0.897369	1.04018	0.994165	0.925946	1.13885	0.82855	0.787236	0.790706	0.890347	0.797378	0.860671	0.861865	0.917287	0.808793	0.888316	0.984749	0.817268	0.793913	0.963209	0.93472	0.8096	0.810949	0.7362	0.925346	0.929736	0.958308	0.846525	0.791014	0.982715	0.890991	0.797416	0.773438	0.935996
	annie	0.962724	0.912296	0.749783	0.944395	0.907829	0.953062	0.821399	0.898269	0.843342	0.911913	0.819227	0.863399	0.765572	0.74382	0.987371	0.767945	0.88631	0.923898	0.849321	1.09146	0.764032	0.713751	0.84648	0.950651	0.892505	0.82859	0.933018	1.00133	0.853777	0.93989	0.949831	0.865566	0.830562	0.871791	0.956072	0.855316	0.960792	0.8102	0.850386	0.780495	1.00629	0.83862	0.574153	0.902238	0.942704	1.00956	1.00579	0.985853
	jennifer	0.907192	0.923887	0.786164	0.964612	0.921688	0.9342	0.840784	1.02375	0.935636	1.0219	0.911984	0.995746	0.966536	0.774611	1.01499	0.900631	1.0036	1.00131	0.957044	0.920192	0.820249	0.921336	0.848527	0.865771	1.08415	0.747061	0.887045	0.850367	0.896099	1.02344	0.871864	0.962428	0.874848	0.888572	0.98646	0.968171	0.945724	0.933183	0.809895	0.873075	1.09126	0.718507	0.789978	0.953694	0.90897	0.737217	0.986037	1.04709
		0.923828	0.942141	0.857723	0.962988	0.913422	0.943967	0.842291	0.924152	0.896107	0.945799	0.870116	0.915224	0.881779	0.854269	0.971218	0.878611	0.927823	0.952781	0.929558	1.06921	0.836033	0.861224	0.873296	0.919433	0.950471	0.828654	0.898968	0.930439	0.892799	0.949202	0.923274	0.904205	0.861113	0.909851	0.994602	0.906393	0.917761	0.852765	0.867079	0.86509	1.02026	0.822752	0.783035	0.960274	0.912753	0.906362	0.951863	0.972773
47. A male first name	john	0.932649	0.870498	0.940349	0.961478	0.968126	0.967757	0.987357	0.96666	0.903958	0.928211	0.963431	0.964054	0.903554	0.883707	0.850894	0.942146	0.943372	0.982872	1.06638	0.983744	0.96061	0.921742	0.903612	0.955639	0.950497	0.945747	0.938789	0.938822	1.06607	1.00525	1.02821	0.967918	1.05991	0.910048	0.932939	0.983582	1.03891	0.969924	0.907967	0.978484	1.03816	0.92973	2.22045e-16	0.894577	1.00152	1.02878	0.989241	1.03436
	mike	0.917835	0.998445	0.979205	1.04289	1.01572	0.917986	0.950062	0.96605	0.835342	0.920596	0.971858	0.895266	0.818072	0.98899	0.909714	0.923332	0.625902	0.736331	0.936897	0.879003	0.948552	0.852747	0.986691	0.939161	0.940976	0.951609	0.97672	0.935521	0.974712	0.99457	1.0405	1.03758	0.980497	1.00438	1.05162	0.821708	0.944991	1.13277	1.03605	0.994258	0.963219	0.881137	0.948448	0.855618	0.923146	0.948918	0.974821	1.0319
	bob	0.90738	1.0276	0.930237	1.04006	1.00358	1.03467	0.858616	0.894212	0.827633	1.01155	1.00677	1.00043	0.902355	0.789414	0.9468	0.917777	0.818782	0.893759	0.936999	1.01974	0.8037	0.842022	1.01422	0.894505	1.04313	1.00432	0.803105	0.933339	0.950902	0.919299	1.01039	0.980172	0.892725	0.988253	0.859449	0.848788	0.8656	0.94686	0.954338	0.991955	0.822621	0.889361	0.956075	0.867821	1.03292	0.798974	0.958158	0.898165
	fred	0.973162	1.03432	0.941308	0.844264	0.86284	0.908606	0.859556	0.880455	0.811847	0.893596	0.863076	0.984991	0.89141	0.816951	0.997615	0.905761	1.0513	1.04543	0.901017	0.968727	0.976863	0.937647	0.961818	0.844232	1.03927	0.97684	0.812598	0.708422	0.923587	0.916074	0.968718	1.09363	0.966006	0.952665	1.02129	0.870691	0.947524	0.98687	0.805106	0.882559	0.917935	0.871936	0.82677	0.965243	0.9431	0.829881	1.01383	0.962329
	joe	0.952986	0.946409	0.928837	0.960263	1.04123	0.996236	0.99427	0.938089	0.968259	0.924849	0.97494	1.01579	0.835924	0.832321	0.948254	0.911806	0.787999	0.912156	0.996872	1.05442	0.87585	0.903187	0.94242	1.09315	0.888526	0.973936	0.951791	0.944369	0.896621	0.888302	1.11372	0.981064	0.8748	0.835325	1.00384	0.852147	1.10341	1.02898	0.973533	0.907912	0.98395	0.959063	0.860022	0.844618	0.948771	0.983991	0.999099	0.986709
		0.936802	0.975454	0.943987	0.96979	0.978299	0.965051	0.929972	0.929093	0.869408	0.935761	0.956015	0.972107	0.870263	0.862276	0.930655	0.920164	0.845472	0.91411	0.967634	0.981126	0.913115	0.891469	0.961751	0.945338	0.97248	0.970491	0.896601	0.892095	0.962378	0.944699	1.03231	1.01207	0.954788	0.938134	0.973828	0.875383	0.980087	1.01308	0.935399	0.951034	0.945176	0.906245	0.897829	0.885575	0.969891	0.918109	0.987031	0.982692
48. A flower	rose	0.801098	0.826569	1.03332	1.09417	1.06058	0.892333	1.01198	1.05677	0.976464	0.966221	0.84821	0.911839	0.793575	0.918651	0.975804	0.930917	0.867676	0.818325	1.11756	0.998676	0.899317	0.958286	0.917397	1.00877	1.02324	0.931569	0.98389	0.893061	0.89362	1.02209	0.953648	0.908271	0.818171	1.03333	1.02631	0.965901	1.10127	0.950235	0.959418	0.827637	0.967849	1.08909	0.894577	7.77156e-16	0.932433	0.971909	0.894919	1.00631
	daisy	0.925151	0.920094	1.0527	0.977966	0.900257	1.01251	1.04178	1.03992	0.945326	0.986072	0.998253	1.02356	1.06674	0.904223	0.941286	0.870952	1.00267	1.03052	0.771724	1.02747	0.918973	0.968408	1.02539	0.999239	0.888144	1.06449	0.898356	0.947009	0.887773	0.844424	1.02479	0.866918	0.918575	0.995648	0.806546	0.921481	0.787531	0.794229	0.914463	0.911939	0.935707	0.857307	1.04059	0.981445	0.937883	0.928334	0.870607	0.814498
	iris
	sun	0.891429	0.966764	0.947366	0.860356	0.87566	0.870022	0.961646	0.877079	0.883742	0.85222	1.0073	0.751943	0.875112	0.933364	1.00216	0.929164	0.961994	1.01614	0.924826	1.09972	0.860615	0.94113	0.844067	0.814807	0.874577	1.11883	0.887367	0.976782	0.846228	0.89214	0.723061	0.951241	0.970827	1.03143	0.88235	0.910054	0.844989	0.951368	0.997497	0.848991	0.805339	0.994315	0.888594	0.932956	0.996419	0.970114	0.896187	0.745948
	lydia
		0.872559	0.904475	1.01113	0.977498	0.9455	0.924954	1.00514	0.991259	0.935177	0.934838	0.951254	0.895781	0.911809	0.918746	0.973084	0.910344	0.944112	0.954998	0.938038	1.04195	0.892968	0.955941	0.928951	0.940939	0.928654	1.0383	0.923204	0.938951	0.875874	0.919551	0.900499	0.90881	0.902524	1.02014	0.905069	0.932479	0.911263	0.89861	0.957126	0.862856	0.902965	0.980237	0.941254	0.957201	0.955579	0.956786	0.887237	0.855586
49. A disease	cancer	0.931747	0.917068	0.696558	0.896454	1.01446	0.905146	1.00784	0.965393	1.01279	0.960306	1.03419	0.957076	0.966042	0.916175	0.989106	0.934662	1.09628	0.916515	0.978959	0.989053	0.943304	1.01717	0.850911	1.03811	0.934065	0.632659	0.982993	0.969864	0.73139	1.02857	0.934366	0.716054	0.933418	0.939939	1.05031	0.982517	0.960885	0.903056	0.866309	0.899374	0.961656	0.915979	1.00152	0.932433	8.88178e-16	0.904381	0.966334	1.04006
	diabetes	0.991505	1.0024	0.901805	1.00009	0.925779	0.979886	1.01406	0.998406	1.0118	0.966621	1.01529	1.00515	1.03797	0.837783	0.946987	0.946651	0.978751	0.943951	0.944989	0.92051	0.93435	1.01054	0.907866	1.01167	0.9582	0.863749	1.00706	1.05321	0.864417	1.03708	1.03792	0.813653	0.977209	1.00331	0.99356	0.956987	0.94092	0.910731	0.887861	0.924356	0.96506	0.964594	0.861313	0.997227	0.578266	1.04613	1.02007	1.11745
	hiv	0.990196	1.03161	0.883473	1.02894	0.843221	0.848593	0.983461	1.00684	1.00159	1.06287	0.912502	1.04663	0.955369	1.01082	0.927504	0.879232	0.887275	0.992476	0.899552	1.05097	0.915127	1.05205	1.04125	0.913052	0.940675	0.798149	1.00549	0.985491	0.983724	0.927964	0.998828	0.854607	0.995934	0.823687	0.970406	1.01161	0.906027	0.988271	0.766932	0.84906	1.05191	0.869874	0.936298	0.949494	0.629098	0.832176	1.01477	0.974934
	leukemia	0.892349	0.986092	0.542789	0.907986	0.921981	0.921972	0.83756	0.90999	0.906076	0.878087	0.767037	0.823677	0.997543	0.762889	0.989269	0.817461	0.922016	0.95654	0.948382	1.06706	0.763753	0.920893	0.731719	0.855664	0.854655	0.766663	0.817831	0.725371	0.722177	0.999438	0.807872	0.892008	0.878345	0.889385	0.951923	0.803082	0.96521	0.820596	0.919322	0.8603	0.922138	0.909762	0.927209	0.899061	0.680559	0.743029	0.893819	0.925461
	alzheimer's	1.05616	0.92893	0.875393	0.919102	1.0062	1.04947	0.973182	0.994693	1.17771	0.966929	1.01777	0.956023	0.957294	0.820742	1.07525	0.988247	1.03159	1.03066	1.04089	0.948793	1.01645	0.942795	0.970377	1.0347	1.06056	0.864847	0.872595	0.984618	0.769146	1.11886	0.965298	0.776009	0.958698	1.10843	0.999732	1.04678	0.946492	0.821986	0.884733	0.855388	0.998473	0.984966	1.04315	0.896322	0.731688	0.948393	1.07713	1.05232
		0.972391	0.97322	0.780004	0.950514	0.942329	0.941013	0.963222	0.975065	1.02199	0.966962	0.949359	0.957713	0.982844	0.869682	0.985624	0.913251	0.983183	0.968028	0.962555	0.995276	0.914597	0.988689	0.900424	0.970639	0.949632	0.785214	0.937193	0.943711	0.814171	1.02238	0.948856	0.810466	0.948721	0.952952	0.993187	0.960194	0.943907	0.888928	0.865031	0.877696	0.979848	0.929035	0.953897	0.934907	0.654903	0.894822	0.994426	1.02204
50. A tree	oak	0.918526	1.0292	0.832629	0.952852	0.946334	1.00615	0.891441	1.04297	0.95175	1.0752	0.912657	0.869291	0.945628	0.950509	0.924822	0.95196	1.05331	1.04096	0.941708	0.997071	0.804078	0.851946	0.859644	0.8842	1.00023	0.929765	0.812236	0.830357	0.883959	0.925502	1.00591	1.01983	0.971728	0.968074	0.889121	0.866347	0.953373	0.99575	0.915598	1.03374	1.03494	0.951508	1.02878	0.971909	0.904381	5.55112e-16	0.896686	0.977839
	maple	0.932759	0.83534	0.886637	0.842157	0.942637	1.00235	0.886399	0.77636	0.881732	0.908605	0.917388	0.987375	0.867146	0.819103	1.00766	1.00077	0.952226	1.03199	0.910461	0.85509	1.00882	0.899394	0.909457	0.912289	0.92455	1.02354	0.74552	0.880312	0.906503	0.922578	0.942041	0.982899	0.834689	0.840779	0.849769	0.711122	0.921722	0.92159	1.02385	0.944846	0.980752	0.997271	0.861772	0.954336	1.07167	0.879931	0.980323	0.880995
	apple	1.03082	0.899402	1.06232	0.99175	0.905771	0.92381	1.01535	0.99662	0.886649	0.969495	1.00753	0.964554	0.985624	0.92849	5.55112e-16	0.90805	1.01926	0.927745	0.932545	0.905445	0.928032	0.840563	0.944843	0.969776	0.94143	1.01748	0.898782	1.05681	1.01065	0.962855	1.02644	1.02179	0.881563	0.909235	1.01745	0.847937	0.934476	0.934992	0.917718	1.01582	1.02635	0.972368	0.850894	0.975804	0.989106	0.924822	1.05255	0.959684
	palm	1.02193	0.902546	0.941224	0.876733	1.00643	1.00715	0.893676	0.988373	0.932995	0.848766	1.0773	0.734804	0.916241	0.908601	1.04759	0.800854	0.953816	0.943641	1.03414	0.945973	0.955814	0.993638	0.834527	0.876633	0.871337	0.990403	0.911535	0.995694	0.877944	0.982676	0.918155	0.926525	0.905374	0.973114	0.899541	0.736101	0.955589	0.94978	1.06256	0.958204	0.932587	1.02946	1.00711	0.900393	0.937151	0.915786	0.918217	0.976296
	cedar	0.98245	0.947995	1.0147	0.860144	0.888982	0.955117	0.836057	1.04351	0.983153	0.878257	0.948121	1.01043	0.959972	0.847239	0.860689	0.92479	0.972222	0.993647	0.932323	1.01413	1.01383	0.88992	0.971766	0.820783	0.938252	0.913037	0.787455	0.831543	0.916148	0.912126	0.957931	0.805515	1.02952	0.909571	1.0369	0.810743	0.930583	0.921609	0.946132	0.946405	0.909712	0.874899	1.00661	1.02006	0.966924	0.78702	0.954103	0.980542
		0.977297	0.922896	0.947504	0.904727	0.938031	0.978913	0.904585	0.969568	0.927256	0.936065	0.972598	0.913291	0.934922	0.890788	0.768153	0.917285	0.990168	0.987596	0.950235	0.943542	0.942115	0.895092	0.904047	0.892736	0.935159	0.974845	0.831106	0.918943	0.919042	0.941148	0.970095	0.951311	0.924574	0.920155	0.938555	0.79445	0.939149	0.944744	0.973171	0.979803	0.976869	0.9651	0.951034	0.9645	0.973847	0.87689	0.960375	0.955071
51. A type of ship/boat	cruise	0.331562	0.951284	0.972372	0.908857	0.935293	0.953134	0.936766	1.02396	0.954949	0.947977	0.944471	0.957967	1.05378	0.98093	1.05255	0.939233	1.04523	1.03341	0.976146	1.14728	0.983621	1.00614	0.965958	1.05535	1.05767	1.00166	0.850089	0.926121	1.00169	0.992472	0.94169	0.997558	1.02886	0.986143	0.930476	1.00531	0.979341	0.957193	1.10958	1.00315	0.84032	1.01172	0.989241	0.894919	0.966334	0.896686	2.22045e-16	0.774573
	yacht	0.880388	0.8781	0.863346	0.80623	0.892786	0.864505	0.989948	0.852548	0.873043	0.871288	0.751677	0.894452	0.958954	0.885	0.826543	0.925491	1.09723	0.882796	0.882631	0.961164	0.819676	0.815387	0.782586	0.84759	0.771497	0.925692	0.812516	0.935414	0.869527	0.877936	0.776019	0.987238	0.695252	0.792463	0.90676	0.769316	0.84863	0.763655	0.844302	0.70854	0.880952	0.885941	0.966662	0.8862	0.854887	0.987604	0.796681	0.714361
	kayak
	ski	0.898587	1.00957	0.992358	0.910325	0.96024	0.927638	0.957686	0.969463	0.911305	0.925481	0.99417	1.04617	0.923464	0.921792	0.987294	1.03281	0.925452	1.02299	1.0545	0.990347	0.895265	1.07547	0.83899	0.926743	0.948159	0.995797	0.790024	0.862268	0.95634	0.999771	0.929996	1.03555	1.07378	0.971165	1.08072	0.849621	0.952963	0.865881	1.02167	0.998115	0.950687	0.956518	0.977587	0.903983	1.03712	0.920562	0.895133	0.862975
	steamer	0.97184	0.918222	0.939589	0.871749	0.934463	1.06949	0.957359	0.940146	0.946065	1.00518	0.888047	0.910913	0.893968	0.860422	1.01439	0.9523	0.91319	1.00676	0.949756	0.960243	0.889588	0.901613	0.992992	0.923925	0.89536	0.967224	0.84436	1.04266	1.01321	0.861432	0.993887	1.0772	0.978462	0.908099	0.847018	0.881777	0.960014	0.980264	0.936861	0.93964	1.00954	0.988776	0.871078	1.01855	1.04963	0.863207	0.984129	0.859566
		0.770594	0.939293	0.941916	0.87429	0.930696	0.953692	0.96044	0.946529	0.92134	0.937481	0.894591	0.952376	0.957543	0.912036	0.970192	0.962459	0.995274	0.986488	0.965759	1.01476	0.897038	0.949653	0.895132	0.938402	0.918172	0.972594	0.824247	0.941615	0.960193	0.932903	0.910398	1.02439	0.944088	0.914468	0.941242	0.876506	0.935237	0.891748	0.978103	0.912362	0.920376	0.96074	0.951142	0.925914	0.976992	0.917015	0.891981	0.802869
52. A fish	tuna	0.876928	0.855614	0.888669	0.775955	0.83674	0.93899	1.02381	0.919725	0.915742	0.916019	0.768179	0.954415	0.893301	0.884373	0.959684	0.896395	0.916472	1.03136	0.805019	1.0783	0.795326	0.927643	0.918993	0.92639	0.742147	1.047	0.778591	1.00011	0.90852	0.842911	0.719309	0.936655	0.972148	0.885193	0.917952	0.949066	0.759664	0.82538	0.985102	0.734272	0.824948	1.02206	1.03436	1.00631	1.04006	0.977839	0.774573	5.55112e-16
	shark	1.02601	1.0256	0.705323	0.978675	1.02442	0.926794	0.897384	0.892098	0.960698	0.919629	0.899198	0.949085	0.995011	0.865658	0.963425	0.910027	0.994031	1.01177	0.915194	1.06603	0.841736	0.879257	0.830015	0.94849	0.8741	0.889537	0.926895	1.02429	0.924832	0.905004	1.04279	0.952185	0.829561	0.861259	0.892433	0.875347	0.870574	0.778441	0.948383	0.867992	1.13987	0.958002	0.938299	0.946155	0.989188	0.881743	0.930971	0.971811
	bass	0.966551	0.943715	0.958523	0.994319	0.831631	0.751224	1.01843	0.852444	0.947804	0.768098	0.778774	1.00039	0.931042	0.89743	0.771847	0.884029	0.844488	0.904174	0.861495	0.952486	0.796364	0.800917	0.866097	0.940773	0.914515	0.925089	0.767416	0.828621	0.914855	0.953821	0.913538	0.931625	0.685325	0.872197	0.907137	0.791445	0.8781	0.797141	0.915521	0.724899	0.911532	0.862654	1.02314	0.890104	0.980136	0.995092	0.989313	0.851297
	beta	0.927803	1.00248	0.949293	0.961384	0.894748	0.951966	1.04022	0.96174	0.864324	0.934361	1.0518	1.0359	0.962564	1.03999	0.838367	0.987968	1.01724	1.0575	0.949751	0.995974	0.959769	0.933098	1.04858	0.880482	0.947965	1.00077	1.05882	1.02954	1.03135	0.910153	1.07979	0.907696	0.829783	1.00479	1.01836	0.870379	0.867194	0.968716	0.907634	0.95842	1.04272	0.81424	0.849508	1.05027	0.825141	0.907612	0.942176	0.91149
	cod	0.849233	0.984707	0.914057	0.909373	0.876162	0.920631	0.948521	0.882324	1.0304	0.897242	0.883152	0.879322	1.02308	1.00344	0.898217	0.914934	0.866412	0.918684	0.879618	0.953011	1.00808	0.971862	0.979261	0.974233	0.989836	1.03049	0.86864	0.969487	0.944933	1.04293	0.973561	1.08787	0.831619	1.12207	0.897414	0.945147	0.925647	0.983475	0.924426	0.952217	0.97596	0.945485	1.00154	0.944251	1.07575	0.754034	0.860129	0.886349
		0.929304	0.962423	0.883173	0.923942	0.892741	0.897921	0.985674	0.901666	0.943793	0.88707	0.876221	0.963822	0.961	0.938178	0.886308	0.918671	0.927728	0.984697	0.882215	1.00916	0.880256	0.902555	0.92859	0.934074	0.893713	0.978577	0.880072	0.970409	0.944898	0.930965	0.945798	0.963206	0.829687	0.949102	0.92666	0.886277	0.860236	0.870631	0.936213	0.84756	0.979007	0.920489	0.969371	0.967418	0.982054	0.903264	0.899432	0.905237
53. A snake	python	1.01968	0.942432	0.879704	1.06154	1.00573	0.873729	1.00165	1.01898	0.945822	0.87954	0.929643	0.972325	1.01961	0.959119	0.773526	1.03527	1.01601	0.953063	0.899963	0.850508	0.879533	0.796726	0.926379	0.964524	0.936856	0.847969	0.997839	1.0399	0.937752	0.832536	0.967045	0.992668	0.721117	0.899687	0.889757	0.74767	0.958899	0.868352	0.875125	0.904656	1.03369	0.886992	0.916674	0.991384	0.993676	0.887106	1.10546	1.06109
	cobra	1.02108	0.961294	1.00407	0.994022	1.07571	0.974776	0.898499	0.992677	1.01905	1.15277	0.943054	0.931678	0.745119	0.980042	0.975922	0.991912	0.973	1.00614	0.960614	0.966722	1.02052	1.14481	0.906529	0.954556	0.982238	1.00143	0.881609	1.00672	0.999846	1.01337	1.01815	0.889275	1.08955	0.968248	1.11439	0.950096	0.958193	1.00963	1.00351	0.977591	1.06894	0.981301	0.946656	0.963628	0.996884	0.849543	1.05839	0.904317
	boa
	garden	0.886418	0.765191	0.85732	0.853766	1.07375	0.923014	0.990168	0.8697	0.891546	0.997794	0.854984	0.798105	0.917109	0.861903	0.930949	0.939761	0.95959	0.868635	1.03388	1.20663	0.797529	0.821996	0.838857	0.996796	0.958177	1.01583	0.842305	0.943573	0.79943	0.855797	0.833041	0.982007	0.871674	0.915112	0.963965	0.881054	0.989195	0.924012	1.00258	0.802743	1.02529	0.999311	1.02446	0.591216	1.02379	0.80831	0.917746	0.842159
	poison	0.96211	0.903582	0.964484	1.02431	0.803984	0.931511	0.933692	0.949423	0.897467	1.03361	0.905963	0.852072	0.895309	0.908512	0.951765	0.851837	0.793219	0.973404	0.77856	1.05268	0.796587	0.911295	0.879225	0.924017	0.784302	0.970368	0.994837	1.08843	0.958171	0.901988	0.937355	0.860178	0.824246	0.89079	0.964353	0.850638	0.71837	0.862624	0.971512	0.830892	1.05146	0.895304	1.00824	0.850197	0.89526	1.00772	0.998788	0.83851
		0.972322	0.893125	0.926394	0.98341	0.989793	0.925757	0.956002	0.957695	0.938471	1.01593	0.908411	0.888545	0.894287	0.927394	0.90804	0.954694	0.935453	0.95031	0.918254	1.01914	0.873542	0.918707	0.887747	0.959973	0.915393	0.9589	0.929148	1.01965	0.9238	0.900924	0.938897	0.931032	0.876647	0.918459	0.983116	0.857364	0.906164	0.916154	0.963181	0.878971	1.04484	0.940727	0.97401	0.849106	0.977404	0.888171	1.0201	0.911518
54. A city	chicago	0.936023	0.802625	0.888159	0.745538	1.0501	1.02596	0.921653	0.968954	0.937475	0.944376	1.05265	0.794457	0.949944	1.00763	0.871929	0.905866	1.09098	0.829795	0.927085	0.934773	0.937842	0.902907	0.785729	0.91619	0.960573	0.849043	0.858623	0.913769	0.802406	0.899045	0.794019	0.975648	1.03046	0.98336	0.932887	0.819821	0.833232	0.884594	1.05785	0.961415	0.886022	1.00335	1.00195	0.95745	0.769678	0.770662	0.987377	0.925081
	nyc	1.00196	0.703714	0.878194	0.857159	0.928263	0.987063	0.841982	0.934211	0.968849	1.00851	0.965713	0.986663	1.01174	0.918923	0.970189	0.915214	1.03346	0.858083	1.0093	0.879909	0.876998	0.80321	0.878201	0.892242	0.928124	0.649345	0.928582	1.01822	0.808174	0.884934	0.741273	0.768227	0.906223	1.0489	0.897712	0.94368	0.925954	0.767466	1.1688	0.960592	0.921144	1.0151	1.00252	0.940624	0.863447	0.868186	0.996035	0.981484
	boston	0.918177	0.877544	1.01037	0.838742	0.92137	0.915908	0.93041	0.986721	0.896821	0.95926	1.04313	0.944143	0.918089	1.02617	0.953546	0.972122	1.07271	0.9157	0.925735	0.929372	1.13244	1.01644	0.945585	0.931969	1.04209	0.893045	0.785068	0.797609	0.887463	0.925235	0.855122	1.04713	1.06807	1.05923	0.929874	0.89334	0.940769	0.957651	0.942379	1.04795	0.861517	0.967508	1.01079	0.943006	0.852554	0.771477	0.975148	0.986965
	denver	0.981841	0.789406	0.926542	0.818934	0.977645	1.01466	0.8741	0.915946	0.98725	0.844103	0.9338	0.92683	0.881298	0.923584	0.9518	0.873369	0.888049	1.00215	0.961114	0.906207	0.946929	0.872408	0.879975	0.896606	0.88622	0.923712	0.80383	0.953894	0.879355	0.865139	0.862353	1.04393	1.01365	1.01679	1.00816	0.84584	0.910273	0.872155	1.01763	0.947029	0.919255	0.946107	0.998415	0.837971	0.932601	0.736335	0.983573	0.897747
	baltimore	0.912792	0.967813	0.918197	0.925497	0.868233	0.987668	0.816947	0.865972	1.00625	0.90287	0.937387	0.925971	0.900233	0.872581	1.10802	0.896813	0.946333	1.02389	0.911084	1.03717	0.997245	0.921171	0.979719	0.823825	1.01412	0.981135	0.953881	0.838111	0.966617	0.887945	0.882628	0.888496	1.04409	0.948294	0.916358	0.997645	0.920298	0.925661	0.954101	0.979068	0.97234	0.925777	0.84214	0.938088	1.01266	0.807538	0.990189	0.936336
		0.950159	0.82822	0.924293	0.837174	0.949122	0.986251	0.877018	0.934361	0.959328	0.931823	0.986536	0.915613	0.932261	0.949777	0.971097	0.912677	1.00631	0.925923	0.946864	0.937486	0.97829	0.903226	0.893842	0.892166	0.966226	0.859256	0.865997	0.90432	0.868803	0.89246	0.827079	0.944687	1.0125	1.01131	0.936998	0.900065	0.906105	0.881505	1.02815	0.97921	0.912055	0.971569	0.971162	0.923428	0.886187	0.79084	0.986464	0.945523
55. A state	california	1.03341	0.937615	0.912429	0.848263	0.975693	1.009	0.840879	1.06207	1.08946	0.96708	0.993967	0.793038	0.987333	0.950625	0.826132	0.767598	0.918919	0.904785	0.908214	0.924241	0.898339	0.814985	0.979764	0.845037	0.97957	0.893183	0.884109	1.01966	0.953294	1.04919	0.952289	0.908575	0.898498	0.903769	0.92241	0.819486	0.843491	0.776438	1.02976	0.98603	1.07739	1.01109	1.01117	1.01587	0.954744	0.889298	0.958294	1.09697
	texas	1.02295	0.991622	0.896439	0.886151	1.06335	0.922937	0.900854	1.05962	0.999243	0.867714	1.08101	0.805707	0.901169	0.921339	0.999183	0.802134	0.985392	0.900202	0.923495	0.802722	0.992054	0.92068	0.933118	0.936711	0.983461	0.924129	0.912528	0.87735	0.857045	0.951625	0.900384	0.920814	0.950062	0.974539	0.932526	0.771493	0.95708	0.925359	1.05108	0.968632	1.00597	0.979502	1.03242	0.938613	0.892415	0.939131	0.998102	1.17602
	florida	0.998853	0.987639	0.815459	0.927301	0.917803	1.04582	0.911887	1.06154	1.08654	0.873605	1.03172	0.827592	1.03365	0.962539	1.06468	0.822717	0.938342	0.865535	1.01317	0.843397	1.00969	0.898353	0.908654	0.931298	0.972167	0.872179	1.02849	0.884403	0.92621	1.03635	0.920687	0.957844	1.01534	1.01641	0.95094	0.838652	0.958585	0.891277	1.12501	0.969038	1.03561	1.01968	0.97261	0.968306	0.957374	0.971555	0.846023	1.11572
	alabama	0.968828	0.977498	0.932868	0.992408	0.903859	0.924608	0.968941	1.00961	0.977553	0.904978	0.984084	0.837721	0.920824	0.913707	1.02072	0.895399	1.01499	0.906641	0.912773	0.928466	1.04667	0.937578	0.954712	0.788915	0.975971	1.01538	0.902507	0.765547	0.827267	0.878904	0.922047	0.858471	1.08679	1.03312	0.975507	0.734371	0.994626	1.03341	1.02251	0.916916	0.967311	0.933959	0.986278	0.924072	0.963206	0.880072	1.03667	1.13969
	louisiana	0.920154	0.900474	0.837547	0.953242	1.01525	1.01454	0.906141	0.945863	1.02195	0.883745	1.10387	0.523404	0.927946	0.946652	0.972573	0.931916	0.909744	0.787128	0.985133	0.860806	0.976834	0.954438	0.700557	0.933195	0.990538	0.920732	1.0958	0.924757	0.895499	0.956267	0.975806	1.05417	0.981776	0.936324	0.958592	0.761902	1.06756	0.927312	1.13651	1.00523	0.994074	0.979121	0.801699	0.849801	0.935053	0.933156	0.913996	1.12418
		0.988838	0.95897	0.878949	0.921473	0.975191	0.98338	0.90574	1.02774	1.03495	0.899425	1.03893	0.757492	0.954184	0.938972	0.976658	0.843953	0.953478	0.872858	0.948556	0.871926	0.984716	0.905207	0.895361	0.887031	0.980341	0.925121	0.964686	0.894344	0.891863	0.974468	0.934243	0.939975	0.986494	0.972831	0.947995	0.785181	0.964268	0.91076	1.07297	0.969168	1.01607	0.984671	0.960834	0.939333	0.940558	0.922642	0.950617	1.13052
56. A college or university	harvard	0.926099	1.06195	0.991089	0.985531	0.755537	0.780551	0.835471	0.983001	0.850621	0.981814	1.00024	0.984235	0.737981	1.00875	1.00647	0.980063	0.901645	0.961895	0.975775	0.952614	0.964553	1.00016	1.01991	0.954733	1.02889	0.829181	0.908497	0.917158	1.02744	0.894877	0.893613	1.03795	1.01047	1.00289	1.01841	1.03298	1.0666	1.05502	0.652964	1.03014	0.984601	0.729913	0.889459	1.03008	0.900856	0.944572	0.963394	1.07978
	stanford	0.969611	1.0128	1.03458	0.863896	0.822659	0.846565	0.850221	1.02799	0.91858	1.02369	0.922698	0.896511	0.912208	0.946561	0.990996	0.972779	0.879891	1.05751	0.935083	1.0882	1.06703	0.930343	1.085	0.962641	1.05991	0.847636	0.914289	0.925373	1.01416	0.885884	1.00896	1.03529	1.03912	1.02134	1.01191	1.03173	1.00865	1.056	0.6821	0.983082	1.01763	0.75818	0.755248	1.00292	0.89531	0.866013	0.984074	1.10567
	mit	0.954485	0.912394	0.946957	0.9906	0.718431	0.760036	0.870616	0.963905	0.777023	0.958656	0.914009	1.03251	0.879885	0.939746	0.841592	0.98223	1.00077	1.06494	0.942499	1.02152	0.977722	0.923698	1.00337	0.909353	0.922241	0.882808	0.944859	0.959644	0.922442	0.848436	0.94005	0.826405	0.967947	1.09441	0.993524	0.901676	0.984603	0.839512	0.745299	1.01079	0.940021	0.847555	0.876583	1.02116	0.916739	0.930556	0.913759	0.983424
	berkeley	0.957857	1.07945	1.10494	0.920156	0.986709	0.960678	0.908251	1.13826	0.834017	1.07006	0.913389	0.979555	0.924878	1.05788	0.950828	1.00508	1.03422	1.09661	0.966143	1.00303	1.0202	0.893741	0.98049	0.955453	0.981581	1.06935	0.906847	0.907224	0.996542	0.865508	0.927347	1.03928	0.92863	1.02187	1.00896	0.982097	0.964174	1.01367	0.812082	1.00746	1.04056	0.88847	1.01078	1.04745	0.931756	0.798534	0.990121	1.02727
	michigan	1.02868	0.918766	0.854714	0.982765	0.83586	1.00107	0.893987	0.98647	1.0584	0.918678	0.892413	0.78335	0.87017	0.890105	0.982142	0.78125	0.938303	0.870658	0.891527	0.871038	0.802789	0.814534	0.928858	0.830353	0.912308	0.881544	0.997191	1.03203	0.867754	0.945304	0.883292	0.924239	1.03216	0.901486	1.02317	0.771892	1.05066	0.905011	0.97451	0.91527	0.982345	1.00636	1.00286	0.919947	0.929917	0.80892	1.02963	1.12309
		0.967346	0.997071	0.986456	0.94859	0.823839	0.869779	0.871709	1.01993	0.887729	0.99058	0.92855	0.935233	0.865024	0.968609	0.954406	0.944281	0.950966	1.01032	0.942205	0.98728	0.966458	0.912496	1.00353	0.922507	0.980986	0.902103	0.934337	0.948285	0.965667	0.888002	0.930652	0.972633	0.995666	1.0084	1.0112	0.944076	1.01494	0.973842	0.773391	0.989349	0.99303	0.846097	0.906987	1.00431	0.914915	0.869719	0.976196	1.06385
57. A drug	marijuana	1.02909	1.01421	0.917997	0.905796	0.810868	1.04105	0.890861	0.9356	1.03739	0.906106	0.902529	0.876231	1.07556	1.00381	0.886007	0.641616	0.957789	0.956675	0.659383	0.967561	0.954567	0.940093	0.949549	0.947038	0.819883	0.905629	0.935944	0.913968	0.916282	0.911521	0.91234	0.930169	0.906559	0.904669	0.891298	0.87752	0.884147	0.836107	0.978171	0.80883	0.8498	0.964737	1.01441	1.07684	0.892093	0.909052	0.938371	0.891108
	heroin	1.0699	0.91305	0.869984	0.882564	0.768205	0.796547	0.892839	0.857565	0.816682	0.892882	0.921241	1.01037	0.862073	0.896293	0.91807	0.799357	0.881375	0.965539	0.822234	1.03299	0.689647	0.748904	0.862265	0.853053	0.789306	0.833732	0.909189	1.02984	0.76569	0.883099	0.779394	0.818476	0.771662	0.879505	0.904951	0.811082	0.823483	0.733928	0.853787	0.679106	0.800995	0.877589	0.958724	0.96904	0.855494	1.00859	1.01269	0.853589
	morphine	1.04741	0.884025	0.900478	0.878847	0.859271	0.96729	1.00421	0.962276	1.07951	0.886866	0.993606	0.937222	0.980165	0.941166	0.965041	0.926115	0.983572	1.01201	0.906742	1.02439	0.977877	0.97306	0.83211	0.993287	0.960178	0.90576	0.877634	0.921245	0.871801	1.10338	0.915583	0.792366	1.02635	1.00805	1.01198	0.938445	0.851393	0.809711	0.870746	0.805237	0.93468	1.00861	0.955521	0.959114	0.751469	0.985517	0.954277	0.938214
	lsd
	opioid	0.989394	1.00412	0.976482	1.02972	0.856369	0.880143	1.007	1.08674	1.08576	0.99799	1.02456	0.957158	0.923988	0.917193	1.04408	0.838518	1.00549	1.11034	0.960481	1.01267	0.971707	0.852091	0.965771	0.978446	1.07182	0.901723	0.977618	0.938044	0.909399	1.07146	0.962857	0.843401	0.953968	1.09357	1.00253	1.00381	0.881563	0.812467	0.833691	0.836246	1.0685	0.975784	0.981092	0.902369	0.791954	1.08044	0.983386	1.15148
		1.03395	0.953851	0.916235	0.924231	0.823678	0.921257	0.948726	0.960544	1.00484	0.920961	0.960484	0.945244	0.960445	0.939615	0.953299	0.801402	0.957057	1.01114	0.83721	1.0094	0.898449	0.878537	0.902424	0.942956	0.910296	0.886711	0.925096	0.950775	0.865793	0.992364	0.892543	0.846103	0.914635	0.971446	0.952691	0.907714	0.860147	0.798053	0.884099	0.782355	0.913494	0.956681	0.977436	0.976841	0.822752	0.995899	0.972182	0.958597
58. A type of car	toyota	0.90824	0.924999	1.06989	0.837901	0.840405	0.915784	0.931691	0.930181	0.871808	0.857721	0.951913	0.945292	0.966791	0.995936	0.820773	0.893599	1.06422	1.01867	0.752029	0.958254	0.890092	0.712358	0.935972	0.857944	0.887381	0.997975	0.883413	0.952881	1.03786	0.820114	0.842462	0.979504	0.879051	0.850305	0.935584	0.756644	0.930909	0.847648	0.951365	0.963204	0.958893	0.969319	1.09678	0.940589	1.04916	0.824903	0.845526	0.849858
	ford	1.01263	1.00002	0.926347	0.968859	0.873487	0.967098	0.916474	0.920049	1.01642	0.831735	1.02469	0.919356	0.955772	0.921384	0.888874	0.941527	0.90995	0.991191	0.935042	0.96424	0.944103	0.928763	0.895514	0.963333	0.898115	0.916684	1.0213	0.918921	0.932132	1.03435	0.997938	0.918841	1.03241	0.862028	1.02302	0.867526	1.04762	0.765653	1.10512	0.99046	1.00896	1.07278	0.960378	1.03083	1.04718	0.859792	0.983133	1.05593
	honda	1.03765	0.922215	0.937859	0.995403	0.887669	1.07896	0.934327	0.855193	0.974236	0.882085	0.845394	0.891724	0.986598	0.849292	0.794217	0.799374	0.933898	0.941571	0.747325	0.998829	0.710647	0.890115	0.768199	0.837901	0.781204	0.877994	0.859752	0.902899	0.919887	1.0111	0.900205	0.910124	0.927995	0.774096	0.922189	0.782506	0.890518	0.669279	1.05674	0.881141	0.913716	1.00361	0.974219	0.941021	1.02161	0.791382	0.996307	0.927124
	bmw	0.856402	0.817114	1.07769	0.948652	0.91068	1.04993	0.918363	0.84695	0.952971	0.949673	0.908823	0.916589	0.880536	0.918437	0.842378	0.923244	0.989504	1.07251	0.94463	0.953739	0.977021	0.972007	0.775501	0.911682	0.946077	0.97275	0.975171	1.00538	1.01935	1.04215	0.903676	0.964789	0.941809	0.988088	1.01405	0.853997	0.913283	0.833006	1.04171	1.0317	1.00555	0.964421	0.945987	0.856822	1.02158	0.818547	0.888309	0.922834
	volkswagen	1.12608	0.99521	1.11274	1.08328	0.891856	0.957056	0.996542	1.02759	1.00788	0.912442	1.06794	0.985966	0.953654	0.964793	0.889787	1.00084	0.878292	0.975374	0.851608	0.956404	0.871066	0.85464	0.97169	0.957434	0.957522	0.950928	0.998506	0.983243	1.10077	0.983917	1.04978	0.867444	0.95954	0.931691	1.04657	0.96015	0.928361	0.747976	0.894893	0.929302	1.02958	0.790997	1.05768	1.01144	1.03803	0.771648	1.06179	0.928896
		0.9882	0.931911	1.0249	0.966819	0.880819	0.993765	0.939479	0.915993	0.964662	0.886731	0.959751	0.931786	0.94867	0.929968	0.847206	0.911717	0.955173	0.999863	0.846127	0.966293	0.878586	0.871577	0.869375	0.905659	0.89406	0.943266	0.947628	0.952665	1.002	0.978326	0.938812	0.92814	0.948161	0.881242	0.988284	0.844164	0.942138	0.772713	1.00997	0.959161	0.983338	0.960226	1.00701	0.956141	1.03551	0.813254	0.955014	0.936928
59. A liquid	water	0.988036	0.942865	0.901389	1.04908	0.825555	0.97343	0.986283	0.820236	0.865608	1.04546	0.913291	0.851898	1.00934	1.0765	0.934476	0.894649	0.943456	0.964643	0.704742	0.976892	0.835276	0.924332	0.862143	0.722436	0.811783	1.00282	0.727625	1.00956	0.902548	0.929973	0.861682	0.836159	0.888724	0.897294	0.881708	0.938857	6.66134e-16	0.787844	0.964681	0.838912	0.944273	0.914852	1.03891	1.10127	0.960885	0.953373	0.979341	0.759664
	juice	0.921343	1.00405	0.983086	0.994571	0.776763	0.966952	0.950666	0.896974	0.853231	0.867515	0.853223	1.01246	0.921405	0.947248	1.01945	0.849589	0.904543	0.994287	0.699265	1.00946	0.80542	0.989209	0.867271	0.814037	0.81358	0.954492	0.894678	0.976579	0.930101	0.902765	0.887013	0.865463	0.807575	0.891709	0.836986	0.871415	0.577301	0.807757	0.923463	0.843539	1.00939	0.876839	0.979779	1.04483	0.909647	0.997729	0.930005	0.798507
	tea	1.08594	0.964671	0.887473	0.964588	0.787724	0.962024	0.951956	0.915674	0.897337	0.918743	0.960148	1.02744	0.916791	0.951322	0.951232	0.802405	0.959087	1.03203	0.835017	0.972268	0.871924	0.973361	1.01479	0.911137	0.774142	0.992531	1.03348	1.04529	0.95865	0.880141	1.01951	0.893106	0.974235	0.860885	0.968882	0.895875	0.783637	0.86513	0.803182	0.840676	1.00453	0.942358	1.0176	1.01818	0.956673	0.906799	1.02329	0.787505
	beer	1.04371	0.934788	0.827003	0.918703	0.799985	0.941484	0.969339	0.840671	1.01566	0.928783	0.784243	0.948894	1.01646	0.949498	0.932545	0.679709	0.929462	0.966758	1.11022e-15	0.96143	0.804739	0.872634	0.958794	0.838242	0.744755	1.02579	0.935746	0.904111	0.910475	0.780304	0.937372	0.94297	0.935381	0.890703	0.770021	0.804881	0.704742	0.785829	0.942458	0.778894	0.853698	1.02519	1.06638	1.11756	0.978959	0.941708	0.976146	0.805019
	coffee	1.03733	0.72828	0.872983	0.902778	0.962573	1.01699	0.963298	0.890818	0.937064	0.851414	0.768388	0.967455	1.0688	0.97012	0.860427	0.697371	0.931422	0.926526	0.729404	1.07082	0.829492	0.837829	0.915167	0.897196	0.705041	0.913928	0.900444	1.03839	0.861055	0.813261	0.831638	0.940068	0.881912	0.909746	0.957046	0.794206	0.812303	0.769112	0.940262	0.863764	0.868809	1.00756	0.95284	0.977713	0.964037	0.968071	1.05263	0.789592
		1.01527	0.91493	0.894387	0.965943	0.83052	0.972176	0.964308	0.872875	0.913779	0.922382	0.855859	0.961628	0.986559	0.978938	0.939627	0.784745	0.933594	0.97685	0.593686	0.998175	0.82937	0.919473	0.923634	0.83661	0.76986	0.977912	0.898394	0.994787	0.912566	0.861289	0.907443	0.895553	0.897565	0.890067	0.882929	0.861047	0.575596	0.803134	0.914809	0.833157	0.93614	0.953359	1.0111	1.05191	0.95404	0.953536	0.992282	0.788057
60. A thing women wear	bra	0.949679	0.937801	0.708675	0.937796	0.931738	0.890323	0.828213	0.905396	0.792496	0.794276	0.744905	0.939337	1.05311	1.02239	0.970762	0.924544	1.08262	0.979537	0.775289	0.902854	0.816987	0.805117	0.791418	0.785963	0.71109	0.768875	0.995906	0.96923	0.767782	0.71092	0.681005	0.902322	0.863676	0.852403	0.857555	0.743288	0.857804	0.742665	0.965379	0.919472	0.864078	1.02359	1.01507	1.08687	0.874199	0.927499	0.976315	0.82303
	skirt	0.938472	0.877741	0.996177	0.889588	0.921753	0.914951	0.991177	0.88971	0.981194	0.903107	0.881749	0.845032	0.972556	0.870137	0.892161	0.825633	0.872958	0.951216	0.881943	1.17539	0.793324	0.815299	0.934257	0.899943	0.866664	0.998644	0.901504	0.943128	0.84312	0.870393	1.01205	0.882759	0.952815	1.08884	0.828074	0.748846	0.91751	0.850396	0.981481	0.789719	0.745208	0.855289	1.02046	0.959173	0.947276	0.837576	0.869598	0.82036
	dress	1.06819	0.911453	0.895852	0.959613	1.02164	1.06086	0.808803	1.01022	0.938415	0.797236	0.811362	0.782232	0.751289	0.967195	1.01233	0.81283	0.896966	0.950017	1.00051	0.953315	0.721483	0.6497	0.805732	0.911889	0.777984	0.939297	0.89725	0.925693	0.855893	0.894648	0.80006	0.976338	0.844789	0.847002	0.918117	0.684929	0.914931	0.784526	1.02274	0.784555	0.861888	1.06176	1.01117	1.00339	1.0499	0.775669	1.02122	0.825765
	blouse
	panties
		0.985448	0.908998	0.866901	0.928999	0.958377	0.955378	0.876064	0.935109	0.904035	0.83154	0.812672	0.855534	0.92565	0.953241	0.958419	0.854336	0.950848	0.960257	0.885915	1.01052	0.777265	0.756705	0.843803	0.865932	0.785246	0.902272	0.931554	0.946017	0.822265	0.82532	0.831039	0.920473	0.887093	0.929415	0.867916	0.725688	0.896748	0.792529	0.989865	0.831248	0.823725	0.980214	1.01557	1.01648	0.957126	0.846915	0.955712	0.823051
61. A thing that flies	bird	0.960811	1.05122	1.01873	1.02687	0.982296	0.828083	1.01657	0.907135	0.882274	0.954075	0.992066	1.01971	0.927944	1.05106	0.995525	0.943548	0.968191	1.04287	0.898139	1.02281	0.877523	1.01074	1.01114	0.771884	0.837153	0.994795	0.906525	0.960959	0.993092	0.931046	0.946689	0.908551	0.96898	0.947211	0.867238	0.956269	0.854358	0.934519	0.927539	0.815082	0.922744	1.07989	1.04213	0.960416	0.910759	0.973603	1.0537	0.823726
	plane	0.804346	0.868531	0.977614	1.04575	0.982603	0.940058	0.80026	0.927808	0.964922	0.77379	0.824505	0.96326	0.9564	0.859329	1.0947	0.978606	0.909862	0.95353	0.931014	0.890486	0.846627	1.01485	0.862058	0.921716	0.825033	0.888112	0.792193	0.924461	0.799484	0.974321	0.929191	0.835179	0.999628	0.949847	0.988895	0.942801	0.918586	0.81571	1.0322	0.928354	0.502533	1.02622	1.04981	0.867848	0.992436	1.02695	0.793367	0.816839
	fly	0.879893	0.902442	0.99178	0.999703	1.02	0.950689	0.897359	0.80702	0.982716	0.698699	0.999632	1.01759	1.04696	0.916727	1.02635	0.902168	0.970551	0.969188	0.853698	1.02763	0.873726	0.961682	1.01241	0.992016	0.876868	1.05109	0.876755	0.933532	0.779582	0.983067	0.932204	0.862437	1.14107	1.05413	0.92462	0.883536	0.944273	0.9502	1.16167	0.883265	3.33067e-16	1.05305	1.03816	0.967849	0.961656	1.03494	0.84032	0.824948
	helicopter	0.915235	0.974943	0.932934	0.945084	0.944117	0.970373	0.925418	0.850676	1.03565	0.962548	0.903126	0.814223	0.990102	0.862701	0.991149	0.903054	0.88132	1.06618	0.920094	0.968458	0.785062	0.88806	0.8252	0.835579	0.947735	0.935285	0.874143	0.972693	0.727678	0.955012	0.947933	0.909388	0.959263	1.05119	0.931644	0.868317	0.814058	0.850638	1.04527	0.869167	0.88983	0.952582	1.08331	1.01184	0.951133	0.833943	0.801508	0.742523
	airplane	0.83481	0.899102	0.967716	0.97609	0.903637	0.953038	0.980775	0.834927	0.91138	0.884475	0.790777	0.964803	0.999188	0.926612	1.01648	0.944528	0.941147	0.954343	0.967579	1.02187	0.940794	0.99483	0.870803	0.846183	0.809629	0.983396	0.813749	0.890725	0.725735	0.962576	0.880429	0.907314	0.973862	0.947686	0.959638	0.963163	0.780856	0.719156	1.01915	0.87886	0.601886	0.902466	1.07497	0.932864	0.868569	0.992362	0.78441	0.81754
		0.879019	0.939248	0.977756	0.9987	0.966532	0.928448	0.924077	0.865513	0.955387	0.854717	0.902021	0.955916	0.984119	0.923286	1.02484	0.934381	0.934214	0.997223	0.914105	0.986252	0.864746	0.974033	0.916322	0.873476	0.859284	0.970536	0.852673	0.936474	0.805114	0.961204	0.927289	0.884574	1.00856	0.990012	0.934407	0.922817	0.862426	0.854045	1.03717	0.874945	0.583399	1.00284	1.05768	0.948164	0.936911	0.97236	0.854661	0.805115
62. A thing that makes noise	alarm	0.941138	0.968737	0.975026	1.05978	0.967186	1.02369	0.870876	1.02771	1.01234	0.943397	0.97917	0.938995	0.949015	0.915771	1.12126	0.921886	0.87807	1.00269	1.01803	1.03409	0.904173	0.887386	0.978648	1.06755	0.971602	0.837025	1.00281	0.988909	0.983648	0.915363	0.91348	0.803165	0.954855	1.02228	0.903939	0.990499	1.04202	1.132	0.877863	0.916173	0.889955	0.964364	0.987107	0.862587	0.916674	0.978776	0.854835	1.04926
	bell	0.888567	0.855779	0.933974	0.784927	0.837401	0.931737	0.896623	1.0223	0.95092	0.979383	0.89123	0.790863	0.947975	0.878828	0.917295	0.857519	1.02053	1.06279	0.832026	1.04045	0.945694	0.857262	0.878272	0.929494	0.97636	1.03126	0.89022	0.883737	1.02032	0.785954	0.863735	0.99101	0.950449	0.865574	0.869074	0.935244	0.868893	0.898333	0.85938	0.919201	1.00368	0.801748	0.736126	1.04818	1.02322	0.814812	0.934872	0.885321
	stereo
	drum	1.02905	0.982915	0.965506	0.972249	0.919493	0.845891	0.945741	1.01923	0.852801	0.917907	0.797717	0.939993	0.90283	0.948575	0.881563	0.860305	0.914578	0.871704	0.935381	0.888506	0.795619	0.734718	0.865805	0.91436	0.884872	0.901211	0.974978	0.981724	0.89844	0.942077	0.927117	1.10896	1.11022e-15	0.727021	0.804021	0.836429	0.888724	0.840863	0.921649	0.693039	1.14107	0.934179	1.05991	0.818171	0.933418	0.971728	1.02886	0.972148
	instrument	1.00981	0.817376	0.935748	0.894919	0.820837	0.877611	1.03751	0.906771	0.935879	0.884694	0.934981	0.878195	1.03957	0.937988	0.878083	0.771931	0.971917	0.990935	0.81346	1.09728	0.91541	0.792321	0.881826	0.890497	0.900618	1.00247	0.843969	0.918519	0.92617	0.913872	0.827651	0.967888	0.85556	0.842619	0.949431	0.764106	0.820877	0.816594	0.885775	0.713892	0.939777	0.887996	0.93434	1.00206	1.04097	0.985696	0.985545	0.877294
		0.967141	0.906202	0.952564	0.927969	0.886229	0.919733	0.937687	0.994004	0.937985	0.931345	0.900774	0.887012	0.959847	0.920291	0.949551	0.85291	0.946273	0.982028	0.899724	1.01508	0.890224	0.817922	0.901138	0.950476	0.933363	0.942991	0.927995	0.943222	0.957145	0.889316	0.882996	0.967756	0.690216	0.864375	0.881616	0.881569	0.905129	0.921947	0.886167	0.810576	0.99362	0.897072	0.929371	0.932749	0.97857	0.937753	0.951027	0.946005
63. A thing that is green	grass	0.982744	0.818466	0.888234	0.760539	0.937203	0.968214	0.869337	0.875645	1.05536	0.902671	0.842353	0.913585	0.960749	0.815462	0.943098	0.722702	0.823816	0.977659	0.801582	1.15338	0.72898	0.757507	0.865494	0.948207	0.838467	0.962224	0.696678	0.887835	0.743198	0.954449	0.807146	0.890356	0.884489	0.971226	0.831138	0.899576	0.676309	0.703965	0.937997	0.803378	0.904202	1.02386	0.991638	0.989429	1.07429	0.900338	0.929758	0.696731
	broccoli
	lettuce
	frog	0.959212	0.969879	0.902967	0.982891	0.869825	0.904198	1.13334	0.751465	0.846114	0.868896	0.866578	1.03263	0.959707	0.968443	0.956661	0.893598	0.900279	0.954292	0.678565	1.00171	0.743605	0.970276	0.904773	0.872701	0.7095	0.961642	0.869553	0.995749	0.928867	0.840112	0.918498	0.884807	0.850256	0.854699	0.871033	0.842992	0.671239	0.777608	0.920944	0.761229	0.934558	0.980046	0.898534	1.04515	0.921847	1.02907	1.00096	0.752358
	pot	0.959962	0.939828	0.741685	0.972596	0.780746	0.909392	0.875041	0.929369	1.01108	0.94012	0.797542	0.921245	0.932361	0.870488	0.968544	0.652466	1.02042	0.998575	0.700615	1.04951	0.747707	0.871174	0.866505	0.884532	0.709988	0.888027	0.88408	0.91516	0.805136	0.965135	0.800734	0.890719	0.902676	0.801925	0.782425	0.807681	0.738916	0.770044	0.83876	0.730917	0.931783	0.916326	0.95384	1.05595	0.899312	0.787756	0.93113	0.797529
		0.967306	0.909391	0.844295	0.905342	0.862591	0.927268	0.95924	0.85216	0.970853	0.903896	0.835491	0.955821	0.950939	0.884798	0.956101	0.756255	0.914837	0.976842	0.726921	1.0682	0.740098	0.866319	0.878924	0.901813	0.752652	0.937297	0.81677	0.932915	0.825734	0.919899	0.842126	0.888627	0.87914	0.87595	0.828198	0.850083	0.695488	0.750539	0.899234	0.765175	0.923514	0.973413	0.948004	1.03018	0.965151	0.90572	0.953951	0.748872
64. A thing made of wood	table	0.915493	0.903603	0.990447	0.918756	0.950386	0.859075	1.00519	1.05114	0.938837	0.880532	0.854256	0.963937	0.916016	0.991464	0.948565	0.953873	1.00942	0.98415	1.01165	0.945375	0.957919	1.00873	0.955109	0.88165	1.03163	1.0044	0.851252	0.844805	0.933456	0.981331	0.852794	1.0813	0.909827	0.925941	1.0492	1.01768	0.948862	0.900255	0.942644	0.816919	0.935567	0.912694	0.955799	0.962306	1.07977	1.09933	0.907963	0.853075
	chair	0.959149	1.00744	1.03564	1.04617	0.941503	0.841002	0.795148	0.991897	0.808801	0.962908	0.818155	0.940064	5.55112e-16	1.02963	0.985624	0.875616	0.817429	0.827608	1.01646	0.95466	0.878776	0.924591	0.977224	0.937947	0.802508	0.911453	0.853978	1.00078	0.918087	0.993247	0.886283	0.905381	0.90283	0.797274	1.11669	0.918706	1.00934	0.911184	0.790948	0.869954	1.04696	0.888582	0.903554	0.793575	0.966042	0.945628	1.05378	0.893301
	desk	0.950965	0.906239	0.938462	0.915946	0.973908	0.886052	0.974445	0.91078	0.763987	0.941385	0.876529	0.915773	0.708843	1.00759	0.940236	0.915398	0.918933	0.70674	0.865059	0.983953	0.814173	0.731415	0.869921	0.866499	0.746407	0.994794	0.722613	0.97085	0.872835	0.86395	0.84862	1.02369	0.759027	0.707193	1.01445	0.687105	0.750778	0.848737	0.848973	0.800208	0.995158	0.939096	0.917406	0.920823	1.05435	0.911398	0.950439	0.805887
	door	1.09935	0.884012	0.770509	0.78741	1.00029	0.979398	0.906217	0.837788	1.1096	0.938625	0.861027	0.893915	0.939824	1.05594	1.01198	0.868182	0.946913	0.999272	0.893309	1.06941	0.753633	1.01328	0.735358	0.92213	0.763099	0.872678	0.914049	0.934159	0.794368	0.921534	0.824389	0.920282	1.02175	0.885803	0.967854	0.862144	0.783635	0.721399	0.957868	0.804646	0.796623	0.885827	0.962385	1.03916	0.916705	0.877643	1.03511	0.734755
	bed	0.873025	0.716251	0.899702	0.901455	0.985175	1.09616	0.906242	0.99676	1.08644	0.958841	0.946919	1.04635	0.93207	0.937781	0.914326	0.948072	1.04103	0.977492	0.824436	0.917548	0.987479	0.925101	1.07809	0.967742	0.921165	0.76525	0.944594	0.975811	0.797849	0.832929	0.834676	0.574107	1.01809	0.990635	0.973725	0.92587	0.931931	0.847054	0.933938	1.0108	0.910723	1.05051	1.04914	0.982042	0.824169	0.934444	0.94291	0.913607
		0.959597	0.883509	0.926952	0.913947	0.970252	0.932337	0.917449	0.957672	0.941533	0.936458	0.871377	0.952007	0.69935	1.00448	0.960146	0.912228	0.946746	0.899052	0.922182	0.974188	0.878396	0.920623	0.92314	0.915194	0.852962	0.909714	0.857297	0.945281	0.863319	0.918598	0.849352	0.900951	0.922303	0.861369	1.02439	0.882301	0.884908	0.845726	0.894874	0.860505	0.937006	0.935341	0.957656	0.939581	0.968207	0.953688	0.978042	0.840125
65. A thing taken from a burning home	money	0.99714	0.984433	0.879267	0.965612	0.961751	0.967462	1.0093	0.95404	0.927378	0.880102	0.96573	0.90298	0.941761	0.890787	0.894255	0.965711	1.01775	0.868168	0.815169	0.950189	0.770656	0.782124	0.950241	1.07712	0.893084	0.94584	0.87323	0.956355	0.90375	0.748303	0.834845	0.922298	0.835439	0.782024	0.839	0.779453	0.913173	0.880614	0.989426	0.796102	0.881116	0.965228	1.0218	1.0118	0.943236	0.957541	0.94219	0.762749
	children	0.986112	0.927224	0.698855	0.881625	0.995184	0.892762	0.923532	0.890653	1.00755	0.958164	0.929161	0.902674	0.957186	0.943676	1.06756	1.00369	1.04406	0.997818	0.93978	1.07412	1.06012	0.984097	0.959851	1.07298	1.00165	0.887043	0.934819	0.97764	0.882457	1.01077	0.961637	0.901101	0.955799	1.00729	0.986961	0.97341	0.998821	0.855751	0.969316	0.928891	0.962126	0.9008	0.990722	0.944066	0.787909	1.07465	0.930287	1.01235
	pictures	0.889894	0.884435	0.913832	0.931014	1.09035	0.950177	0.94507	0.94278	0.883465	0.941264	0.874105	0.980341	0.912249	0.991127	0.980176	0.977681	0.954007	0.993623	1.0112	0.976767	0.921062	0.811646	0.934487	0.896511	0.841648	0.883429	0.832939	1.00565	0.760448	0.982871	0.814693	0.930386	0.978129	0.946797	0.856987	1.06258	0.884399	0.931377	0.996273	0.904275	0.893622	0.918226	0.883452	0.90562	0.933189	0.870173	0.929858	0.782246
	pets	0.9565	0.985244	0.923506	1.01454	1.0092	0.980898	1.07351	0.419036	0.876878	1.00834	0.951833	1.05295	0.981876	0.956578	0.954913	0.947527	0.959751	0.927618	0.888666	0.954625	0.92373	1.01015	0.960769	1.01424	0.942053	1.04237	0.888491	1.03931	0.888112	0.945948	1.00096	1.09577	0.932147	0.960198	0.939682	0.936504	0.787734	0.928183	1.07079	0.859031	0.891872	1.02089	0.964104	1.03616	0.949829	1.14973	1.01545	0.932078
	jewelry	1.14051	1.0556	0.898941	0.979391	0.734399	0.826645	0.885724	1.02116	0.909392	0.810239	0.818172	0.833345	0.859074	0.780774	0.974299	0.81526	0.912134	0.832057	0.823283	1.00567	0.621955	0.820405	0.823247	0.832871	0.777982	0.920592	0.849851	0.927236	0.764047	0.879922	0.863316	0.913411	0.691693	0.855972	0.948321	0.766767	0.899461	0.784221	0.69719	0.622302	0.973249	0.779517	1.00901	0.993776	0.940771	0.872051	1.0787	0.784556
		0.994031	0.967388	0.86288	0.954436	0.958176	0.923589	0.967426	0.845534	0.920933	0.919622	0.9078	0.934458	0.930429	0.912588	0.97424	0.941974	0.97754	0.923857	0.89562	0.992276	0.859504	0.881685	0.925719	0.978744	0.891283	0.935855	0.875866	0.981239	0.839763	0.913563	0.895091	0.952592	0.878641	0.910457	0.91419	0.903743	0.896717	0.876029	0.944599	0.822121	0.920397	0.916933	0.973818	0.978283	0.910987	0.984828	0.979299	0.854795
	b(i)	0.770594	0.82822	0.721347	0.833606	0.820567	0.75636	0.830163	0.826201	0.820142	0.83154	0.720365	0.617708	0.69935	0.827737	0.768153	0.730171	0.839749	0.758158	0.593686	0.827103	0.716984	0.756705	0.771149	0.804861	0.752652	0.774544	0.803381	0.81623	0.789356	0.798008	0.790353	0.802289	0.690216	0.826187	0.828198	0.725688	0.575596	0.750539	0.764347	0.741733	0.583399	0.811989	0.783035	0.849106	0.774166	0.79084	0.55663	0.725856
	a(i)	0.664904	0.823659	0.483948	0.799233	0.825925	0.763966	0.714126	0.749057	0.804591	0.690985	0.865552	0.897168	0.923955	0.894059	0.940353	0.844775	0.829797	0.935853	0.696994	0.777415	0.737997	0.896149	0.694621	0.849788	0.675362	0.664392	0.824124	0.412019	0.881758	0.772352	0.847107	0.820014	0.73244	0.865594	0.874981	0.846565	0.648032	0.723791	0.658977	0.915822	1.00201	0.822752	0.897829	0.957201	0.654903	0.87689	0.891981	0.905237
	s(i)	0.158956	0.00550758	0.329105	0.0412337	-0.00648791	-0.0100552	0.139776	0.0933724	0.0189613	0.169029	-0.201546	-0.311492	-0.24309	-0.0741803	-0.183123	-0.135662	0.0118517	-0.234378	-0.14822	0.060075	-0.0284721	-0.155603	0.0992387	-0.0558198	0.114443	0.142215	-0.0258185	0.495217	-0.104793	0.0321505	-0.0718084	-0.0216152	-0.0576486	-0.0476977	-0.0534673	-0.142786	-0.111778	0.0356381	0.137856	-0.190091	-0.417771	-0.0132548	-0.127857	-0.112927	0.154053	-0.0981311	-0.375962	-0.198159
	a>b?	FALSE	FALSE	FALSE	FALSE	TRUE	TRUE	FALSE	FALSE	FALSE	FALSE	TRUE	TRUE	TRUE	TRUE	TRUE	TRUE	FALSE	TRUE	TRUE	FALSE	TRUE	TRUE	FALSE	TRUE	FALSE	FALSE	TRUE	FALSE	TRUE	FALSE	TRUE	TRUE	TRUE	TRUE	TRUE	TRUE	TRUE	FALSE	FALSE	TRUE	TRUE	TRUE	TRUE	TRUE	FALSE	TRUE	TRUE	TRUE
	s(i)	0.158956	0.00550758	0.329105	0.0412337	-0.00648791	-0.0100552	0.139776	0.0933724	0.0189613	0.169029	-0.201546	-0.311492	-0.24309	-0.0741803	-0.183123	-0.135662	0.0118517	-0.234378	-0.14822	0.060075	-0.0284721	-0.155603	0.0992387	-0.0558198	0.114443	0.142215	-0.0258185	0.495217	-0.104793	0.0321505	-0.0718084	-0.0216152	-0.0576486	-0.0476977	-0.0534673	-0.142786	-0.111778	0.0356381	0.137856	-0.190091	-0.417771	-0.0132548	-0.127857	-0.112927	0.154053	-0.0981311	-0.375962	-0.198159
	s(i)	0.137154	0.00550758	0.329105	0.0412337	-0.00648791	-0.00995511	0.139776	0.0933724	0.0189613	0.169029	-0.167739	-0.311492	-0.24309	-0.0741803	-0.183123	-0.135662	0.0118517	-0.189875	-0.14822	0.060075	-0.0284721	-0.155603	0.0992387	-0.0528686	0.102691	0.142215	-0.0251687	0.495217	-0.104793	0.0321505	-0.0669974	-0.0216152	-0.0576486	-0.0455262	-0.0534673	-0.142786	-0.111778	0.0356381	0.137856	-0.190091	-0.417771	-0.0130814	-0.127857	-0.112927	0.154053	-0.0981311	-0.375962	-0.198159
		0.137154	0.00550758	0.329105	0.0412337	-0.00648791	-0.00995511	0.139776	0.0933724	0.0189613	0.169029	-0.167739	-0.311492	-0.24309	-0.0741803	-0.183123	-0.135662	0.0118517	-0.189875	-0.14822	0.060075	-0.0284721	-0.155603	0.0992387	-0.0528686	0.102691	0.142215	-0.0251687	0.495217	-0.104793	0.0321505	-0.0669974	-0.0216152	-0.0576486	-0.0455262	-0.0534673	-0.142786	-0.111778	0.0356381	0.137856	-0.190091	-0.417771	-0.0130814	-0.127857	-0.112927	0.154053	-0.0981311	-0.375962	-0.198159
[truncated: 13 more columns]

## Sheet: ordered list
s(i)	term	Category
0.495217	football	29. A sport
0.329105	mother	3. A relative
0.233972	chicago	54. A city
0.231685	california	55. A state
0.169029	blue	10. A color
0.163029	toyota	58. A type of car
0.154053	cancer	49. A disease
0.142215	doctor	27. An occupation or profession
0.139776	officer	7. A military title
0.137856	biology	40. A science
0.137154	diamond	1. A precious stone
0.102691	gas	26. A fuel
0.0992387	priest	24. A member of the clergy
0.0943196	harvard	56. A college or university
0.0933724	dog	8. A four-footed animal
0.060075	usa	21. A country
0.0412337	mile	4. A unit of distance
0.0356381	car	39. A transportation vehicle
0.0321505	shirt	31. An article of clothing
0.0189613	cotton	9. A type of fabric
0.0118517	president	18. An elective office
0.00550758	hour	2. A unit time
-0.00346689	grass	63. A thing that is green
-0.00648791	silver	5.A metal
-0.00995511	magazine	6. A type of reading material
-0.0130814	sarah	46. A female first name
-0.0216152	oxygen	33. A chemical element
-0.0251687	mountain	28. A natural earth formation
-0.0284721	robbery	22. A crime
-0.0455262	dollar	35. A kind of money
-0.0485987	bra	60. A thing women wear
-0.0528686	salt	25. A substance for flavoring food
-0.0534673	rap	36. A type of music
-0.0572162	marijuana	57. A drug
-0.0576486	drum	34. A musical instrument
-0.0669974	window	32. A part of a building
-0.0741803	leg	15. A part of the human body
-0.0981311	oak	50. A tree
-0.104793	tornado	30. A weather phenomenon
-0.111778	water	38. A non-alcoholic beverage
-0.112556	money	65. A thing taken from a burning home
-0.112927	rose	48. A flower
-0.127857	john	47. A male first name
-0.130082	bird	61. A thing that flies
-0.135662	gun	17. A weapon
-0.142786	eagle	37. A bird
-0.14822	beer	20. An alcoholic beverage
-0.155603	hammer	23. A carpenter's tool
-0.161191	python	53. A snake
-0.167739	knife	11. A kitchen utensil
-0.183123	apple	16. A fruit
-0.189875	house	19. A type of human dwelling
-0.190091	doll	41. A toy
-0.192209	alarm	62. A thing that makes noise
-0.198159	tuna	52. A fish
-0.225438	table	64. A thing made of wood
-0.24309	chair	14. An article of furniture
-0.27946	water	59. A liquid
-0.311492	church	12. A building for religious services
-0.375962	cruise	51. A type of ship/boat
-0.417771	fly	45. An insect
